# Supplementary material for: Evidence for efficient anchoring in nitroxyl radical thin films: an experimental XPS/NEXAFS and theoretical DFT/TD-DFT study
Source: Royal Society of Chemistry journal article supplement (doi:10.1039/d4tc00427b), 2024-01-01
Supplement: d4tc00427b1.pdf [file d4tc00427b1.pdf]

## Electronic Supplementary Information

### Evidence for Efficient Anchoring in Nitroxyl Radical Thin Films: an Experimental XPS/NEXAFS and Theoretical DFT/TD-DFT Study

Roberta Totani,\* Ivan Ljubić,\* Sascha L. Mehl, Viacheslav Kalinovich, Matteo Jugovac, Gabriele Bonano, Alessandra Ciavardini, Cesare Grazioli, Federico Galdenzi, Sergio D'Addato, Monica de Simone, Polina M. Sheverdyayeva, Paolo Moras, Nataliya Tsud, and Marcello Coreno

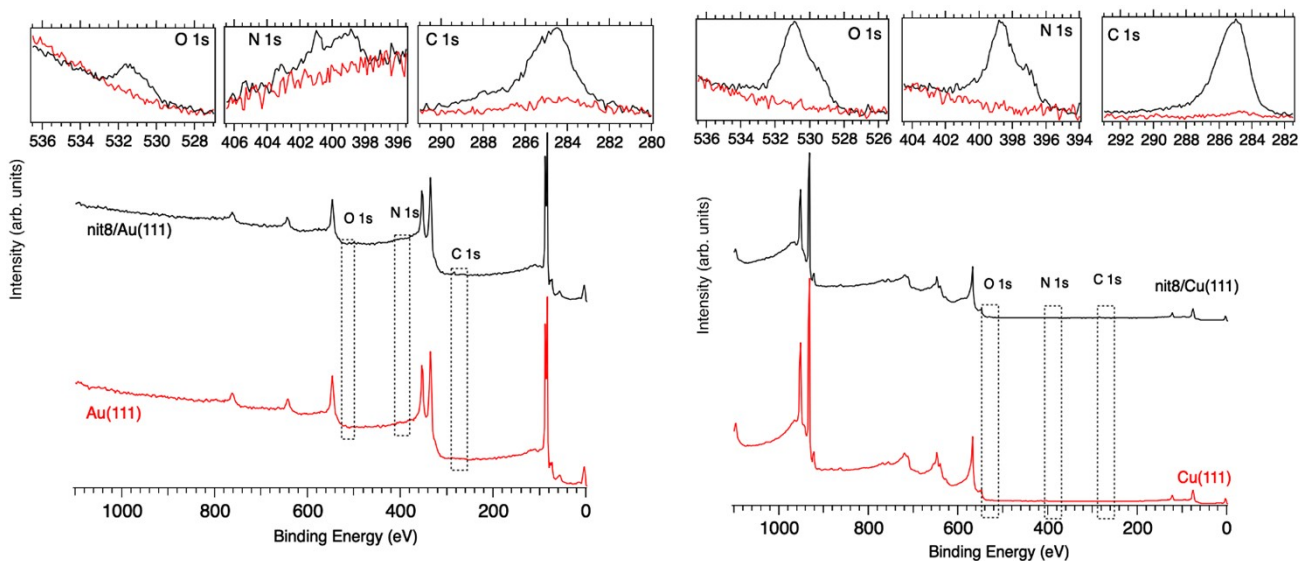

**Figure S1:** The overviews and core levels acquired before and after nit8 deposition on Au(111) and Cu(111) with  $h\nu = 1486.61$  eV (Al  $K_{\alpha}$ ). After deposition, no further elements were detected besides O, N and C.

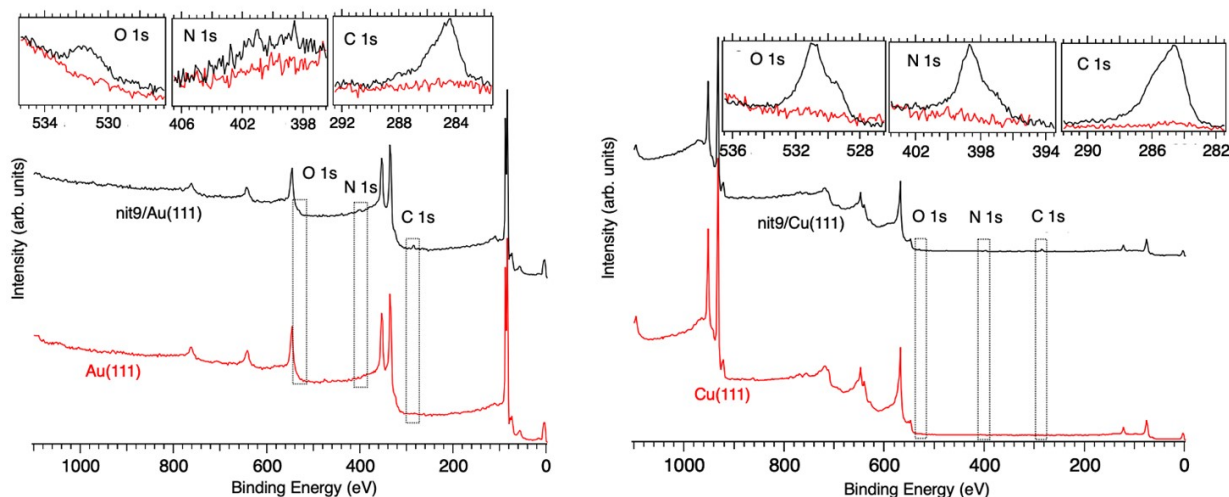

**Figure S2:** The overviews and core levels acquired before and after nit9 deposition on Au(111) and Cu(111) with  $h\nu = 1486.61$  eV (Al  $K_{\alpha}$ ). After deposition, no further elements were detected besides O, N and C.

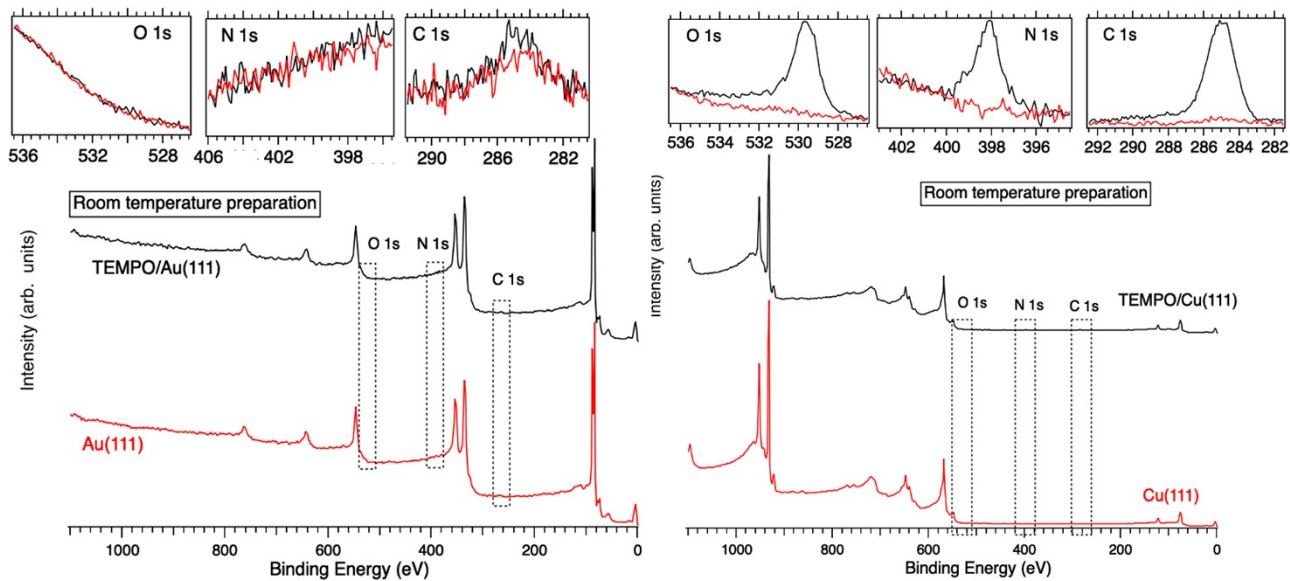

**Figure S3:** The overviews and core levels acquired before and after TEMPO deposition on Au(111) and Cu(111) with  $h\nu = 1486.61$  eV (Al  $K_{\alpha}$ ). A proper and neat film was achieved on Cu(111) whereas no appreciable signal from TEMPO core levels could be detected on Au(111).

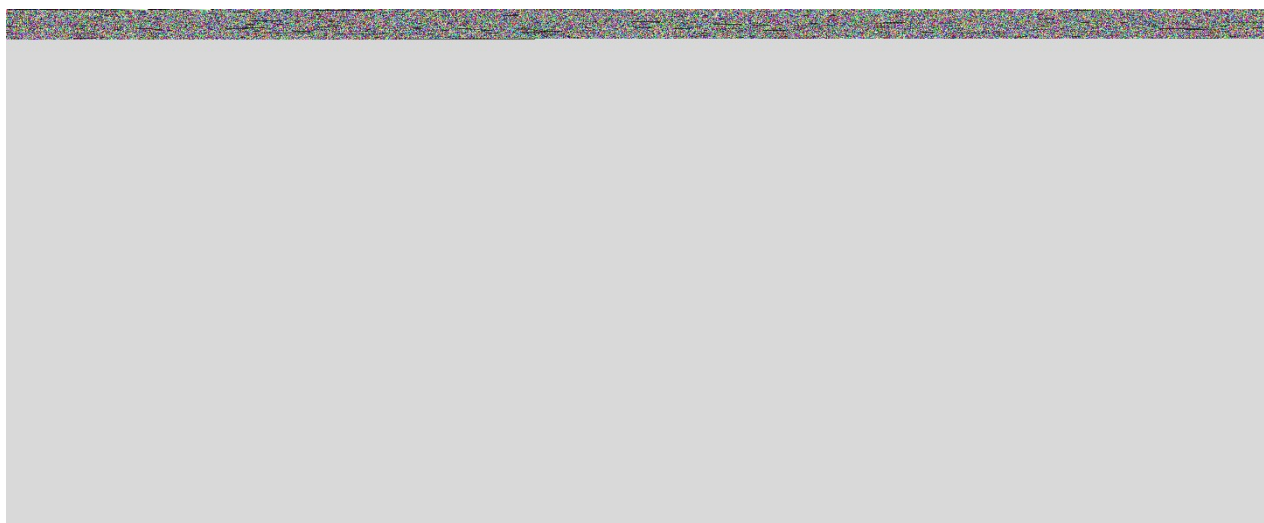

**Figure S4:** The overviews and core levels acquired before and after TEMPO deposition on Au(111) and Cu(111) cooled down by means of  $\text{LN}_2$ . The overview and O 1s:  $h\nu = 660$  eV; N 1s and C 1s:  $h\nu = 515$  eV. The preparation was successful on both substrates. After deposition no further elements were detected besides O, N and C. The Au 4f peaks are cut to allow O, N and C 1s spectra visualization.

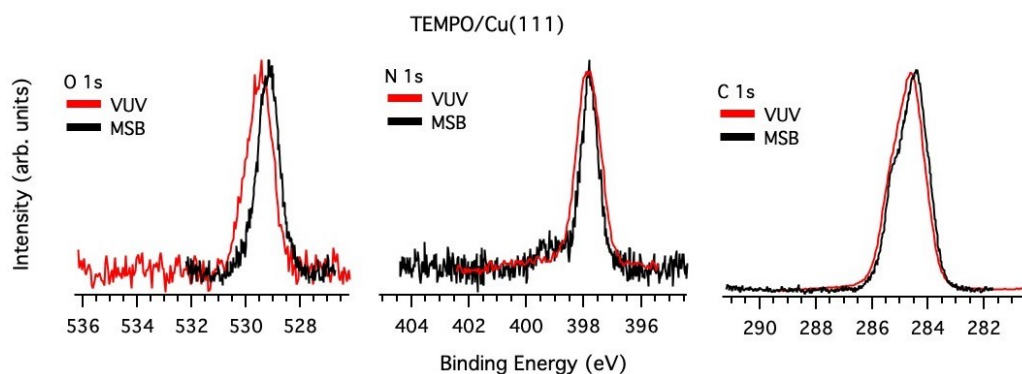

**Figure S5.** Comparison of TEMPO on Cu(111) XPS spectra as obtained at the VUV and MSB beamlines. At the VUV, the Cu substrate was cooled down by means of LN<sub>2</sub> whereas at the MSB, the film growth was performed at room temperature.

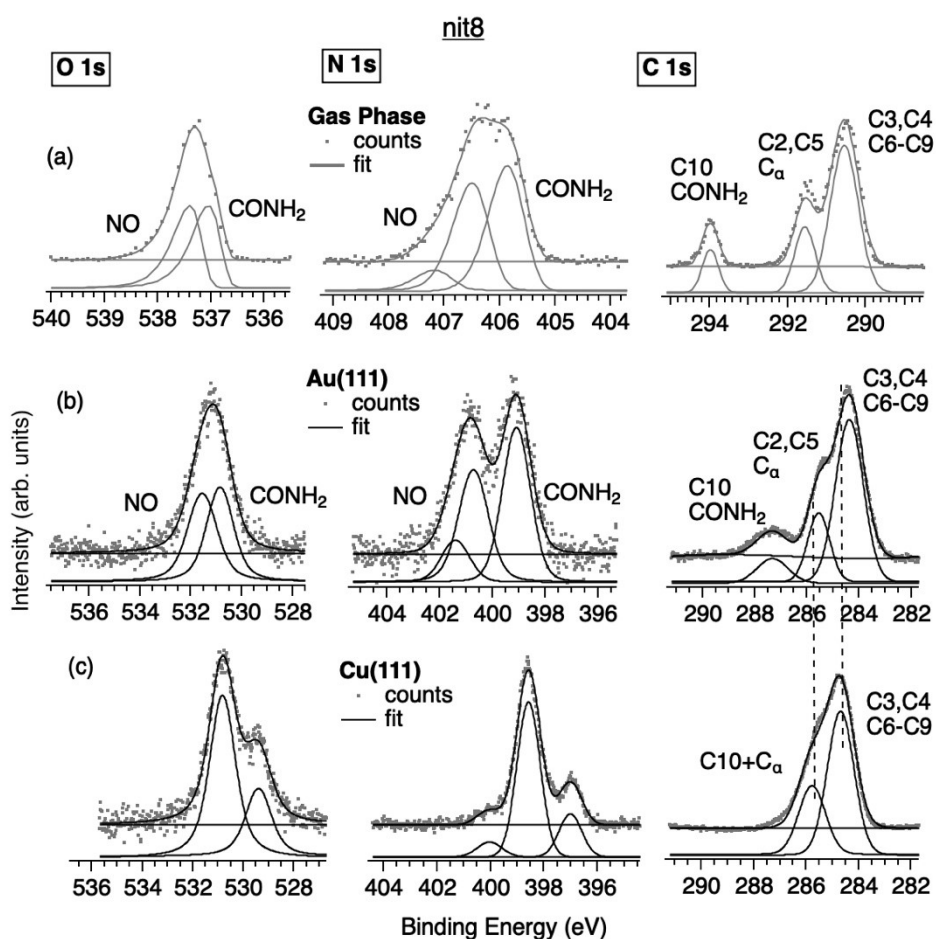

**Figure S6.** Comparison of nit8 O, N and C 1s core levels in (a) gas phase, and as thin films deposited onto the (b) Au(111) and (c) Cu(111) surface. For each spectrum, the fitting analysis is also shown. Note that different BE scales are employed to display the gas-phase and film results. Vertical dashed lines are added as a guide for better visualization of the peak alignment.

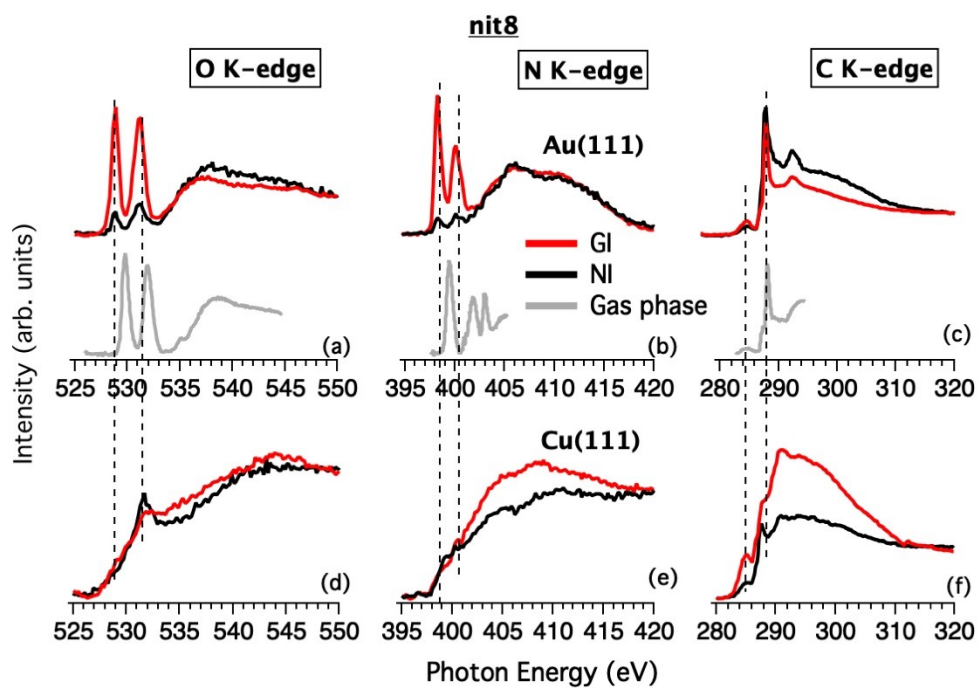

**Figure S7.** NEXAFS spectra of nit8 in the gas phase and adsorbed onto the Au(111) and Cu(111) surfaces at O K-edge (a and d), N K-edge (b and e) and C K-edge (c and f). Vertical dashed lines are added as line guide for a better visualization of peak alignment.

**Table S1:** Comparison between the BE positions (eV) of the C, N and O 1s core levels of nit8 and nit9 deposited on Au(111) and Cu(111) and the proposed spectral assignments: (i)  $C_{\alpha}$  = C2 and C5, i.e. the C atoms bonded to N; (ii) **NO**,  $CONH_2$  is largely due to NO, with possibly a minor contribution due to  $CONH_2$ ; (iii)  $CONH_2 \cdots Cu$  is due to the fragments of  $CONH_2$  on the Cu surface; (iv) **NO(weak)** is due to the S-T splitting in the final core-ionized states.

|         |                          |                 |              |       |                    |       |                                             |      |                                      |      |
|---------|--------------------------|-----------------|--------------|-------|--------------------|-------|---------------------------------------------|------|--------------------------------------|------|
|         | Nit8                     | Nit9            | Nit8         | Nit9  | Nit8               | Nit9  | Nit8                                        | Nit9 | Nit8                                 | Nit9 |
| C 1s    | C10                      |                 | $C_{\alpha}$ |       | C3, C4, C6-C9      |       | $\Delta(C10 - C_{\alpha})$                  |      | $\Delta(C_{\alpha} - C3, C4, C6-C9)$ |      |
| Au(111) | 287.3                    | 287.6           | 285.5        | 285.8 | 284.4              | 284.5 | 1.8                                         | 1.8  | 1.1                                  | 1.3  |
| Gas     | 294.0                    |                 | 291.6        |       | 290.5 290.4        |       | 2.4                                         |      | 1.1                                  | 1.2  |
| N 1s    | NO,<br>NO( <i>weak</i> ) |                 | $CONH_2$     |       |                    |       | $\Delta(NO - CONH_2)$                       |      |                                      |      |
| Au(111) | 400.7,<br>401.4          | 400.8,<br>401.4 | 399.1        | 398.7 |                    |       | 1.6                                         | 2.1  |                                      |      |
| Gas     | 406.5,<br>407.2          | 406.7,<br>407.2 | 405.9        |       |                    |       | 0.6                                         | 0.8  |                                      |      |
| O 1s    | NO                       |                 | $CONH_2$     |       |                    |       | $\Delta(NO - CONH_2)$                       |      |                                      |      |
| Au(111) | 531.6                    | 531.7           | 530.9        | 530.8 |                    |       | 0.7                                         | 0.9  |                                      |      |
| Gas     | 537.2                    | 537.3           | 536.8        | 536.9 |                    |       | 0.4                                         | 0.4  |                                      |      |
| C 1s    | C10                      |                 | $C_{\alpha}$ |       | C3, C4, C6-C9      |       | $\Delta(C10 - C_{\alpha})$                  |      | $\Delta(C_{\alpha} - C3, C4, C6-C9)$ |      |
| Cu(111) | -                        | -               | 285.8        | 285.6 | 284.7              | 284.4 | -                                           | -    | 1.1                                  | 1.2  |
| N 1s    | NO ( <i>weak</i> )       |                 | NO, $CONH_2$ |       | $CONH_2 \cdots Cu$ |       | $\Delta[(NO, CONH_2) - (CONH_2 \cdots Cu)]$ |      |                                      |      |
| Cu(111) | 400.0                    | 400.3           | 398.7        | 398.7 | 397.0              | 397.0 | 1.7                                         | 1.7  |                                      |      |
| O 1s    | NO                       |                 | NO, $CONH_2$ |       | $CONH_2 \cdots Cu$ |       | $\Delta[(NO, CONH_2) - (CONH_2 \cdots Cu)]$ |      |                                      |      |
| Cu(111) | -                        | -               | 530.8        | 530.7 | 529.4              |       | 1.4                                         | 1.3  |                                      |      |

**Table S2:** The stoichiometry extracted from the XPS data of nit9 and nit8 on Au(111) and Cu(111).

|                            |       |       |       |
|----------------------------|-------|-------|-------|
| nit9 ( $C_9H_{15}N_2O_2$ ) | C (%) | N (%) | O (%) |
| Theoretical values         | 69.2  | 15.4  | 15.4  |
| Au(111)                    | 68.7  | 16.1  | 15.2  |
| Cu(111)                    | 74.1  | 13.8  | 12.1  |
| nit8 ( $C_9H_{17}N_2O_2$ ) | C (%) | N (%) | O (%) |
| Theoretical values         | 69.2  | 15.4  | 15.4  |
| Au(111)                    | 68.8  | 15    | 16.2  |
| Cu(111)                    | 72.4  | 15.1  | 12.6  |

**Table S3:** The stoichiometry extracted from the XPS data of TEMPO on Au(111) and Cu(111).

| TEMPO            | C (%) | N (%) | O (%) |
|------------------|-------|-------|-------|
| Reference values | 81.8  | 9.1   | 9.1   |
| Au(111)          | 78    | 13    | 9     |
| Cu(111)          | 78.5  | 13.5  | 8     |

**Table S4:** The XPS data fitting parameters. Gas phase spectra were simulated by employing Gaussian fit functions. A “shape” parameter was included in the fit, in order to obtain skewed curves.<sup>1</sup> These reproduced the characteristic asymmetric tail of gas phase photoemission peaks, due to the contribution of the intramolecular vibrations.<sup>2,3,4</sup> Differently from TEMPO, skewness was not needed for nit8 and nit9 C 1s gas phase spectra, where intramolecular vibrational modes get likely frustrated by the presence of the amide functional group. Peak positions and main spectral components were deduced from previous gas phase results.<sup>5</sup> Film data were simulated by employing Voigt fit functions. Considering the resemblance between gas phase and NRs/Au(111) results, for the film data the distances in BE between peaks, as well as the ratio between the peak areas, were kept fixed according to the gas phase values, while these constraints were kept slacker or not employed at all for Cu(111) data. For each peak, the Gaussian and the Lorentzian full width at half maximum (G. fwhm and L. fwhm, respectively) are indicated separately. Whenever possible, fwhm values were constrained to have the same value for the components of the same spectrum.

**Nit8***Gas phase*

| Core level | Peak              | BE (eV) | G. fwhm (eV) | Shape parameter |
|------------|-------------------|---------|--------------|-----------------|
| C 1s       | C 10              | 294     | 0.5          | -               |
|            | C <sub>α</sub>    | 291.6   | 0.6          | -               |
|            | C3, C4, C6 – C9   | 290.5   | 0.8          | -               |
| N 1s       | NO (weak)         | 407.2   | 0.8          | 0.2             |
|            | NO                | 406.5   | 0.8          | 0.2             |
|            | CONH <sub>2</sub> | 405.9   | 0.8          | 0.2             |
| O 1s       | NO                | 537.2   | 0.7          | 0.4             |
|            | CONH <sub>2</sub> | 536.8   | 0.7          | 0.4             |

*Au(111)*

| Core level | Peak              | BE (eV) | G. fwhm (eV) | L. fwhm (eV) |
|------------|-------------------|---------|--------------|--------------|
| C 1s       | C 10              | 287.3   | 1.4          | -            |
|            | C <sub>α</sub>    | 285.5   | 1.0          | -            |
|            | C3, C4, C6 – C9   | 284.4   | 1.3          | -            |
| N 1s       | NO (weak)         | 401.4   | 1.2          | 0.3          |
|            | NO                | 400.7   | 1.2          | 0.3          |
|            | CONH <sub>2</sub> | 399.1   | 1.2          | 0.3          |
| O 1s       | NO                | 531.6   | 1.1          | 0.5          |
|            | CONH <sub>2</sub> | 530.9   | 1.0          | 0.5          |

*Cu(111)*

| Core level | Peak                     | BE (eV) | G. fwhm (eV) | L. fwhm (eV) |
|------------|--------------------------|---------|--------------|--------------|
| C 1s       | C <sub>α</sub>           | 285.8   | 1.1          | 0.1          |
|            | C3, C4, C6 – C9          | 284.7   | 1.1          | 0.1          |
| N 1s       | NO (weak)                | 400.0   | 0.7          | 0.5          |
|            | NO, CONH <sub>2</sub>    | 398.7   | 0.7          | 0.5          |
|            | CONH <sub>2</sub> ... Cu | 397.0   | 0.7          | 0.5          |
| O 1s       | NO, CONH <sub>2</sub>    | 530.8   | 0.8          | 0.7          |
|            | CONH <sub>2</sub> ... Cu | 529.4   | 0.8          | 0.7          |

**Nit9***Gas phase*

| Core level | Peak              | BE (eV) | G. fwhm (eV) | Shape parameter |
|------------|-------------------|---------|--------------|-----------------|
| C 1s       | C 10              | 294.0   | 0.5          | -               |
|            | C <sub>α</sub>    | 291.6   | 0.6          | -               |
|            | C3, C4, C6 – C9   | 290.4   | 0.8          | -               |
| N 1s       | NO (weak)         | 407.2   | 0.8          | 0.2             |
|            | NO                | 406.7   | 0.6          | 0.2             |
|            | CONH <sub>2</sub> | 405.9   | 0.7          | 0.2             |
| O 1s       | NO                | 537.3   | 0.7          | 0.2             |
|            | CONH <sub>2</sub> | 536.9   | 0.7          | 0.3             |

*Au(111)*

| Core level | Peak              | BE (eV) | G. fwhm (eV) | L. fwhm (eV) |
|------------|-------------------|---------|--------------|--------------|
| C 1s       | C 10              | 287.6   | 0.9          | 0.4          |
|            | C <sub>α</sub>    | 285.8   | 0.7          | 0.4          |
|            | C3, C4, C6 – C9   | 284.5   | 0.9          | 0.4          |
| N 1s       | NO (weak)         | 401.4   | 0.5          | 0.5          |
|            | NO                | 400.7   | 0.5          | 0.4          |
|            | CONH <sub>2</sub> | 398.7   | 0.9          | 0.3          |
| O 1s       | NO                | 531.7   | 0.7          | 0.6          |
|            | CONH <sub>2</sub> | 530.8   | 0.7          | 0.6          |

*Cu(111)*

| Core level | Peak              | BE (eV) | G. fwhm (eV) | L. fwhm (eV) |
|------------|-------------------|---------|--------------|--------------|
| C 1s       | C 10              | 287.6   | 0.9          | 0.4          |
|            | C <sub>α</sub>    | 285.8   | 0.7          | 0.4          |
|            | C3, C4, C6 – C9   | 284.5   | 0.9          | 0.4          |
| N 1s       | NO (weak)         | 401.4   | 0.5          | 0.5          |
|            | NO                | 400.7   | 0.5          | 0.4          |
|            | CONH <sub>2</sub> | 398.7   | 0.9          | 0.3          |
| O 1s       | NO                | 531.7   | 0.7          | 0.6          |
|            | CONH <sub>2</sub> | 530.8   | 0.7          | 0.6          |

**TEMPO***Gas phase*

| Core level | Peak   | BE (eV) | G. fwhm (eV) | Shape parameter |
|------------|--------|---------|--------------|-----------------|
| C 1s       | C2, C6 | 291.3   | 0.5          | 0.2             |
|            | C4     | 290.7   | 0.5          | 0.2             |

|      |                |       |     |     |
|------|----------------|-------|-----|-----|
|      | C8, C9, C3, C5 | 290.4 | 0.5 | 0.2 |
|      | C7, C10        | 290.1 | 0.5 | 0.2 |
| N 1s | NO             | 406.4 | 0.6 | 0.2 |
|      | NO (weak)      | 407.0 | 0.6 | 0.2 |
| O 1s | NO             | 537.0 | 0.6 | 0.3 |

*Au(111)*

| Core level | Peak           | BE (eV) | G. fwhm (eV) | L. fwhm (eV) |
|------------|----------------|---------|--------------|--------------|
| C 1s       | C <sub>α</sub> | 285.5   | 1.0          | 0.1          |
|            | C3-C5, C7-C10  | 284.3   | 1.0          | 0.3          |
| N 1s       | NO             | 400.8   | 1.1          | 0.3          |
| O 1s       | NO             | 531.4   | 1.0          | 0.2          |

*Cu(111)*

| Core level | Peak           | BE (eV) | G. fwhm (eV) | L. fwhm (eV) |
|------------|----------------|---------|--------------|--------------|
| C 1s       | C <sub>α</sub> | 285.2   | 0.9          | 0.1          |
|            | C3-C5, C7-C10  | 284.3   | 1.0          | 0.1          |
| N 1s       | NO             | 397.8   | 0.8          | 0.2          |
| O 1s       | NO             | 529.5   | 1.1          | 0.0          |



## Additional computational details

**Siesta.** Siesta<sup>6</sup> is a first-principles periodic DFT code and method that combines the norm-conserving pseudopotential approach with linearly combined atomic-centred orbitals (LCAO) basis functions of finite support, i.e. each AO is exactly zero beyond a chosen cut-off radius. This method was used for the fully unconstrained optimizations of the unit cells consisting of one NR molecule adsorbed on a 3-layer  $4 \times 4$  Cu (111) or 4-layer  $3 \times 3$  Au (111) slab. Taking care that the minimum distance of the adsorbates from neighbouring unit cells is not unphysically small, we found that the  $4 \times 4$  Cu and  $3 \times 3$  Au unit cells with one adsorbed NR molecule (i.e. 1/16 and 1/9 coverages) are of suitable size to represent the fully saturated NR monolayers on the Cu (lattice constant 3.6 Å) and Au (lattice constant 4.1 Å) slabs, in accordance with the experimental conditions. For these large and computationally expensive unit cells, the  $k$ -point grid cut-off parameter<sup>7</sup> was limited to 10 Å, which gave rise to 5  $k$ -points for the Au slabs, and 2  $k$ -points for the larger Cu slabs. The vacuum space between the apex atom of NR and the lowest layer of the metal slab was always kept larger than 11 Å, which was sufficient to prevent undesired artificial interactions between the adjacent slab copies.

For the exchange-correlation (XC) density functional, we used the Hammer-Hansen-Nørskov revised version of the generalized gradient approximation (GGA) XC functional of Perdew, Burke, and Ernzerhof (PBE), denoted by RPBE.<sup>8</sup> Relative to PBE, the RPBE functional resulted in the improved adsorption energies on metal surfaces while also rectifying certain deficiencies in the earlier proposed Zhang-Yang revision of PBE.<sup>9</sup> The double- $\zeta$  polarized (DZP) basis sets of the hard-confined numerical orbitals of the Sankey–Niklewski type were used in all cases.<sup>10</sup>

Using the auxiliary program Atom 4.2.0 supplied with Siesta, we generated hard pseudopotentials (PPs) of the improved Troullier–Martins flavor<sup>11,12</sup> for the H, C, N, O, Cu, and Au atoms based on the RPBE functional.<sup>8</sup> The PPs were non-relativistic for H, C, N, and O, and relativistic and in addition core-corrected<sup>13</sup> for Cu and Au. The thus-generated PPs showed a good transferability in the subsequently performed tests with various electron configurations. The excitation energy determining the orbital confinement radii<sup>14</sup> (the PAO.EnergyShift parameter in Siesta) was set to 0.01 Ry, which allowed for the more extended atomic orbitals than the default value of 0.02 Ry. We observed this parameter to be crucial for satisfactorily reproducing the lattice constants and cohesive energies of the Cu and Au bulk metals. The plane wave equivalent energy cut-off for the 3D grid was set to 300 Ry, which was sufficient to curb the numerical noise due to the “egg-box” effect (the oscillations in the energy and forces when translating the atoms in the unit cell). The electronic temperature for the Fermi-Dirac smearing during the SCF procedure was set to 300 K; hence the reported adsorption energies concern the differences in the electronic free energies.<sup>15</sup> The periodic calculations on the unit cells containing NRs (i.e. the NR adsorbed on the surface as well as the bare radical) were performed as spin-polarized (the collinear polarization) with the spin value fixed at 1.0 (doublet) while those containing only the metal slabs were spin-non-polarized.

The FIRE<sup>16</sup> and modified Broyden search algorithms were used interchangeably during the geometry optimizations. All the atoms in the unit cells together with the lattice vectors were allowed to relax until the forces on each atom fell below 0.05-0.06 eV/Å, corresponding to <0.01 eV accuracy in the final energies. This is sufficient for the purpose of obtaining a set of reasonable structures for the subsequent single-point DFT and TD-DFT computations using the Orca code.

The obtained final energies were used to compute the adsorption energies ( $E_{\text{ads}}$ ) of the two NRs on the Cu and Au surfaces for the various tested adsorption sites according to:

$$E_{\text{ads}} = E(\text{NR}\cdots\text{slab}) - (E(\text{NR}) + E(\text{slab})) \quad (1)$$

All the energy terms pertain to the fully relaxed unit cells. In the optimization of the isolated NR molecules, for the starting lattice vectors we used the final lattice vectors from the corresponding NR $\cdots$ slab unit cell and retained the same  $k$ -grid cut-off parameter.

**Orca.** We next switched to the Orca<sup>17,18</sup> code, version 5.0.3, and all-electron basis sets to retrieve the information about the C, N, and O 1s core electrons. To this end, single-point DFT and restricted single excitation space (RSES) TD-DFT computations<sup>19</sup> were performed for the structures consisting of one NR molecule bonded onto two-layer Cu or Au clusters. These structures are cut-out portions of the Siesta optimized unit cells, and were used as such without further optimization. For the DFT and RSES-TD-DFT single-point calculations, the long-range corrected hybrid CAM-B3LYP density functional<sup>20</sup> was used, which showed superior performance for the diffuse and charge-transfer excited states relative to the parent B3LYP.<sup>20</sup> To describe the scalar relativistic effects important for the transition metal atoms, the zeroth-order regular approximation (ZORA) was employed.<sup>21</sup> For the H, C, N, O, and Cu atoms we used the re-contracted versions of the all-electron Karlsruhe def2-TZVP basis sets<sup>22,23</sup> suitable for ZORA computations, and denoted by ZORA-def2-TZVP, while SARC-ZORA-TZVP was used for the Au atoms.<sup>24</sup> For the systems of TEMPO (nit9) adsorbed on the 14-atom Cu or Au cluster this choice led to 1230 (1276) and 2014 (2060) basis functions, respectively. The preliminary tests indicated only a minor effect of adding the diffuse functions via the minimal augmentation (ma-), and so to save time we omitted them from the basis set. To speed-up these expensive calculations by means of the density fitting, the segmented all-electron relativistically contracted (SARC) Coulomb-fitting auxiliary sets were adopted, denoted by SARC/J. Also, the RIJCOSX approach was used whereby the Coulomb term is evaluated using the resolution of identity (RI) approximation while the exchange term is evaluated via the semi-numerical (“chain-of-spheres”) integration.<sup>25,26</sup> The used Orca tight “DEFGRID3” DFT integration grid consisted of the M3-mapped Gauss-Chebyshev radial grids and 302-points Lebedev angular grids resulting on average in ca. 7,000 (11,000) grid points per atom for the Cu (Au) clusters. The reason for using the simple Koopmans' approximation to model the XPS spectra instead of the preferred  $\Delta$ DFT approach, which allows for the orbital relaxation effects, is that the core-hole states were found to be unfeasibly difficult to converge for the systems of this complexity.

## References

1. A. Azzalini, A. Dalla Valle, *Biometrika* **1996**, *83*, 715.
2. J. Lüder, M. de Simone, R. Totani, M. Coreno, C. Grazioli, B. Sanyal, O. Eriksson, B. Brena, C. Puglia, *J. Chem. Phys.*, **2015**, *142*, 074305.
3. I. Minkov, F. Gel'mukhanov, H. Ågren, R. Friedlein, C. Suess, W. R. Salanek, *J. Phys. Chem. A* **2005**, *109*, 1330.
4. O. Kwon, V. Coropceanu, N. E. Gruhn, J. C. Durivage, J. G. Laquindanum, H. E. Katz, J. Cornil and J. L. Brédas, *J. Chem. Phys.*, **2004**, *120*, 8186.
5. Kovač, B.; Ljubić, I.; Kivimäki, A.; Coreno, M.; Novak, I. *Phys. Chem. Chem. Phys.*, **2014**, *16*, 10734.
6. Soler, J. M.; Artacho, E.; Gale, J. D.; Garcia, A.; Junquera, J.; Ordejon, P.; Sanchez-Portal, D. *J. Phys.: Condens. Matter* **2002**, *14*, 2745.
7. Moreno, J.; Soler, J. M., *Phys. Rev. B* **1992**, *45*, 13891.

8. Hammer, B.; Hansen, L. B.; Norskov, J. *Phys. Rev. B* **1999**, *59*, 7413.
9. Y. Zhang, W. Yang, *Phys. Rev. Lett.*, 1998, *80*, 890.
10. O. F. Sankey, D. J. Niklewski, *Phys. Rev. B*, 1989, *40*, 3979.
11. Troullier, N.; Martins, J. L. *Phys. Rev. B* **1991**, *43*, 1993.
12. Troullier, N.; Martins, J. L. *Phys. Rev. B* **1991**, *43*, 8861.
13. Louie, S. G.; Froyen, S.; Cohen, M. L. *Phys. Rev. B* **1982**, *26*, 1738.
14. Sánchez-Portal, D.; Artacho, E.; Soler, J. M. *J. Phys.: Condens. Matter* **1996**, *8*, 3859.
15. Wentzcovitch, R. M.; Martins, J. L.; Allen, P. B. *Phys. Rev. B* **1992**, *45*, 11372.
16. Bitzek, E.; Koskinen, P.; Gähler, F.; Moseler, M.; Gumbusch, P. *Phys. Rev. Lett.* **2006**, *97*, 170201.
17. F. Neese, *Wiley Interdisciplinary Reviews: Comput. Mol. Sci.*, **2012**, *2*, 73.
18. F. Neese, *Wiley Interdisciplinary Reviews: Comput. Mol. Sci.*, **2017**, *8*, 1327.
19. N. A. Besley, *Chem. Phys. Lett.*, **2004**, *390*, 124.
20. T. Yanai, D. P. Tew, N. C. Handy, *Chem. Phys. Lett.*, **2004**, *393*, 51.
21. E. van Lenthe, E. J. Baerends, J. G. Snijders, *J. Chem. Phys.*, **1993**, *99*, 4597.
22. F. Weigend, R. Ahlrichs, *Phys. Chem. Chem. Phys.*, **2005**, *7*, 3297.
23. F. Weigend, F. *Phys. Chem. Chem. Phys.*, **2006**, *8*, 1057.
24. D. A. Pantazis, X. -Y. Chen, C. R. Landis, F. Neese, *J. Chem. Theory. Comput.*, **2008**, *4*, 908.
25. Neese, F., *J. Comput. Chem.* **2003**, *24*, 1740.
26. Neese, F.; Wennmohs, F.; Hansen, A.; Becker, U., *Chem. Phys.* **2009**, *356*, 98.

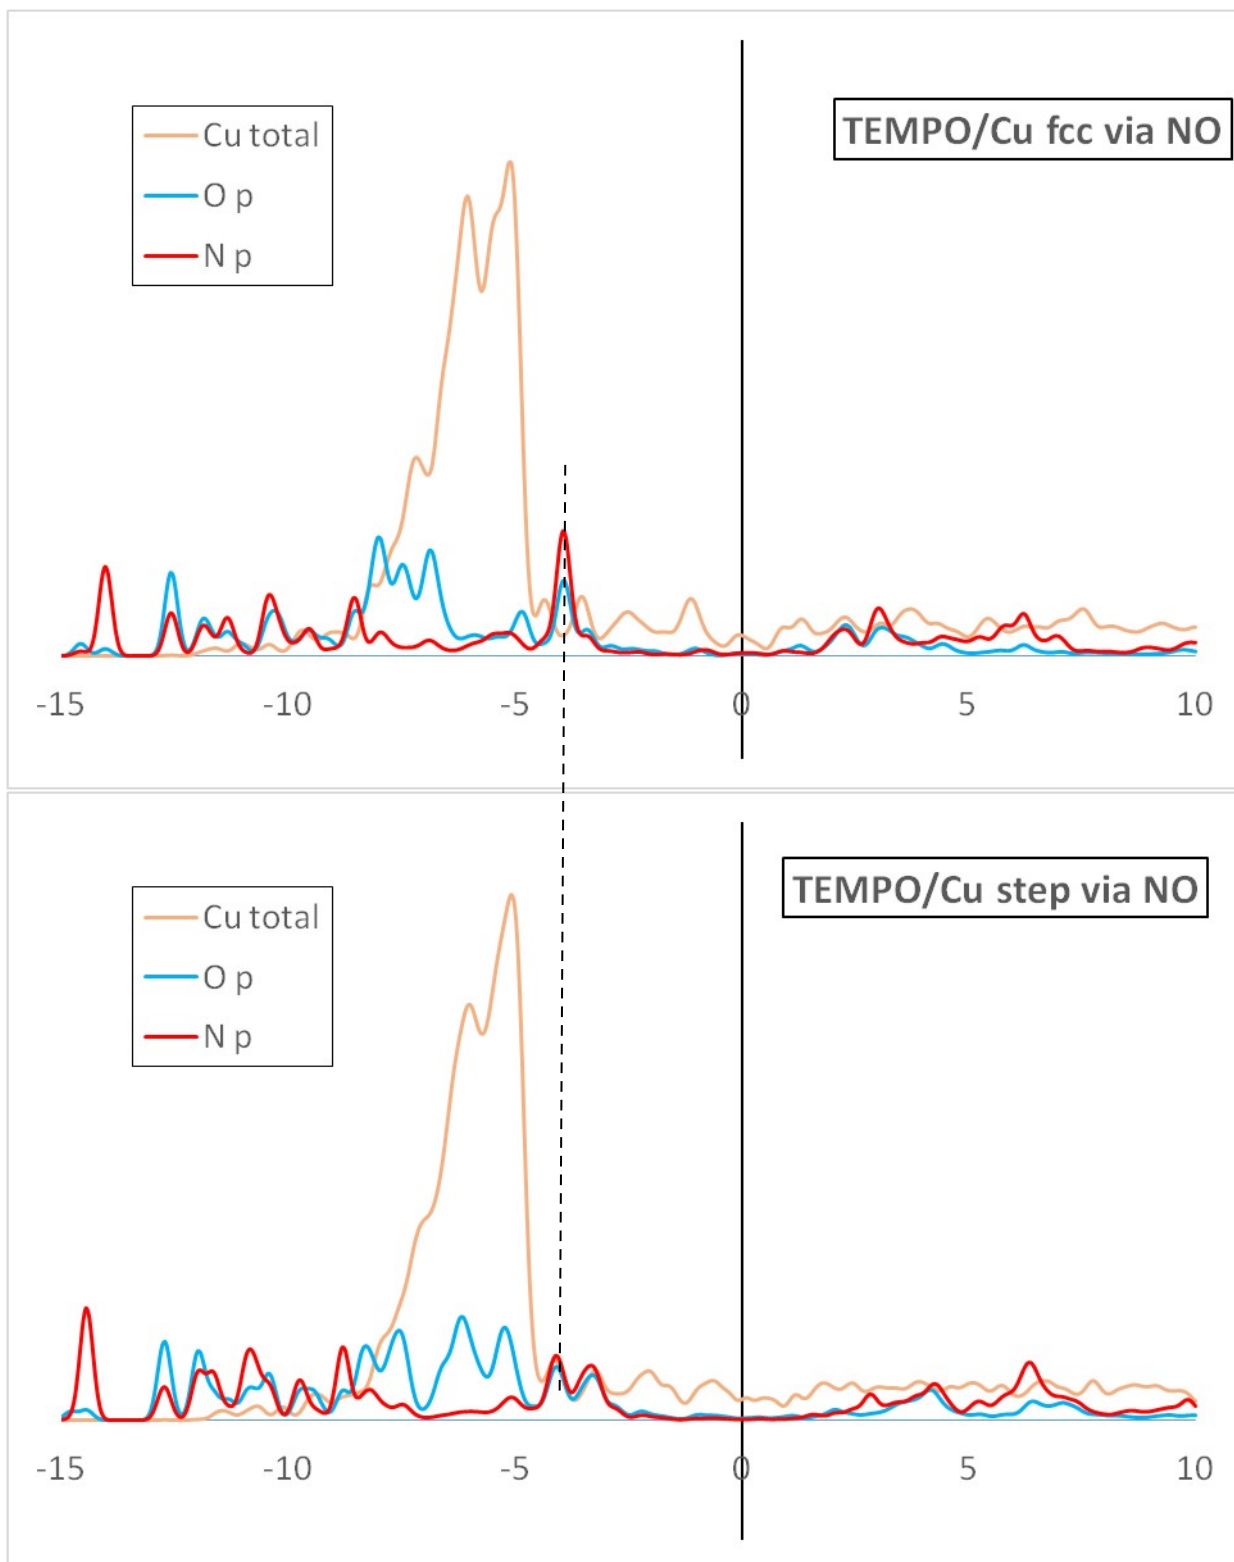

**Figure S8.** Partial density of states (PDOS) plots (energy in eV) for the two types of adsorption in the TEMPO/Cu system (O p = 2p-orbitals on the O atom etc.). The  $\pi$ (N-O) spike (dashed vertical rule) is higher in case of the adsorption on the flat Cu owing to the larger charge donation from the Cu surface.

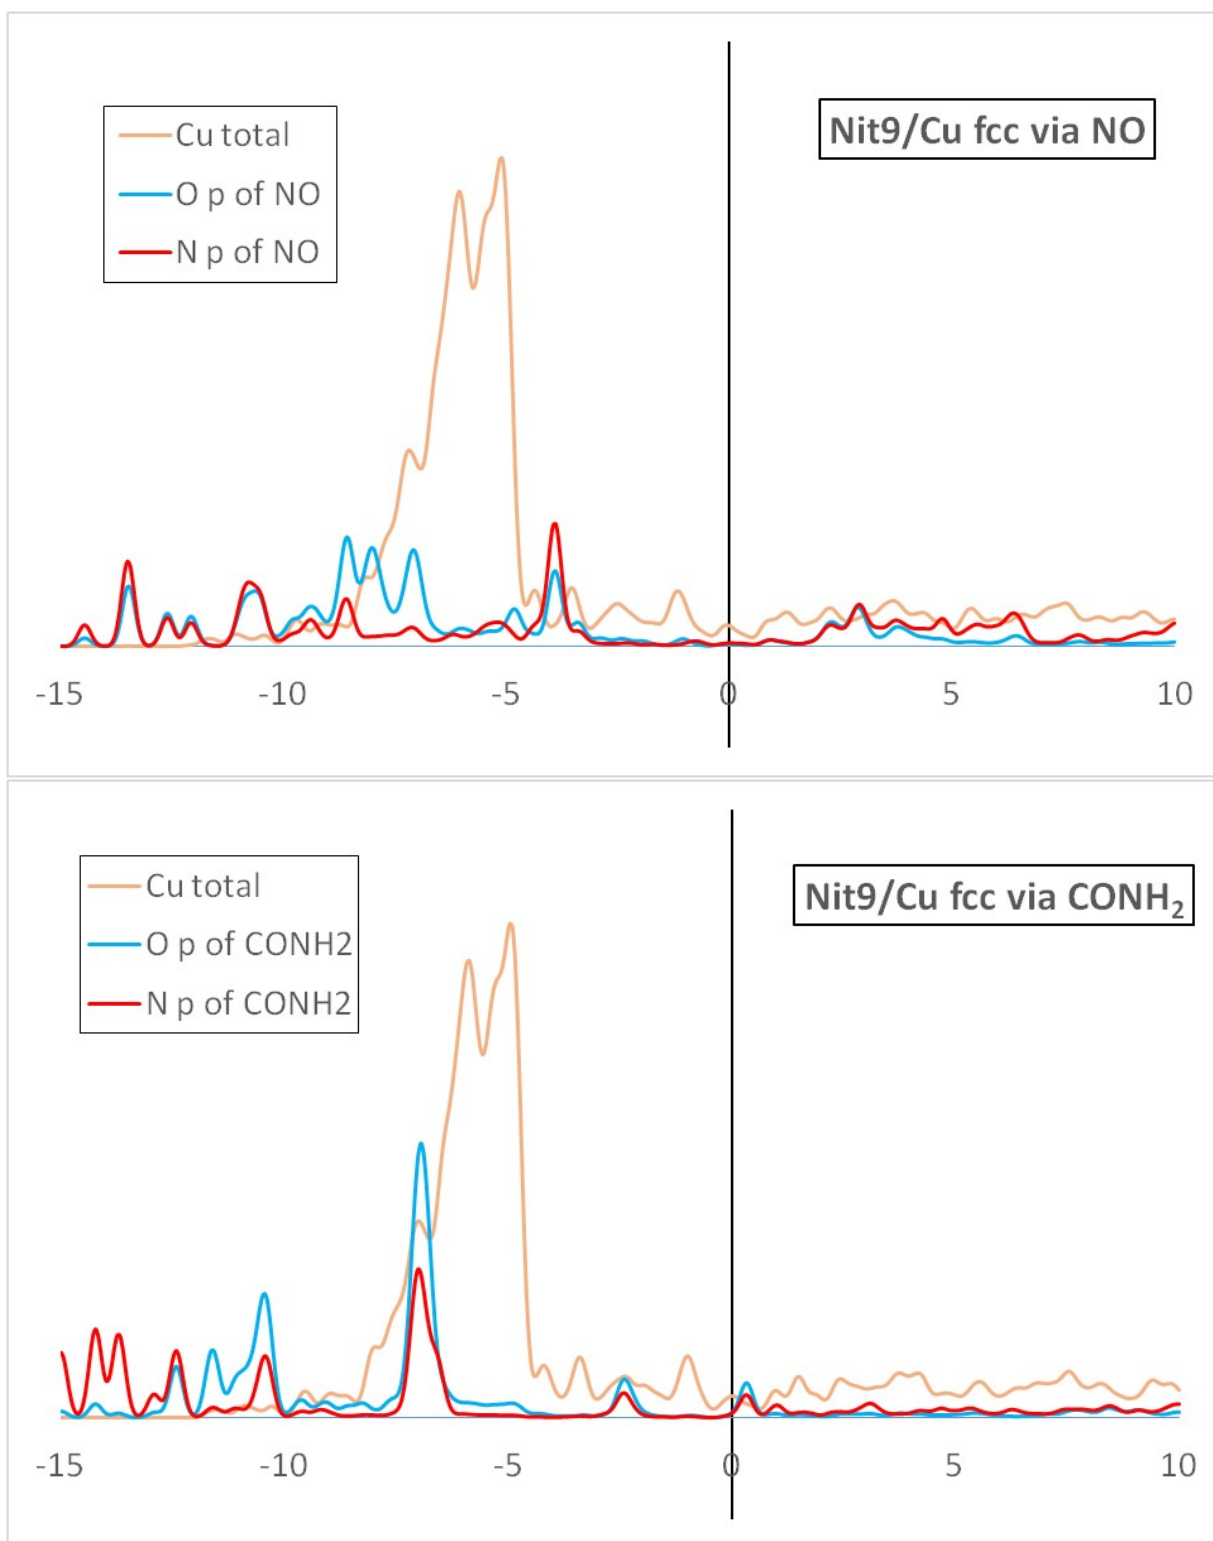

**Figure S9.** Partial density of states (PDOS) plots (energy in eV) for the two types of adsorption in the nit9/Cu system (O p = 2p-orbitals on the O atom etc.). The interaction of the NO and CONH<sub>2</sub> 2p states with the Cu surface states is clearly visible in both cases.

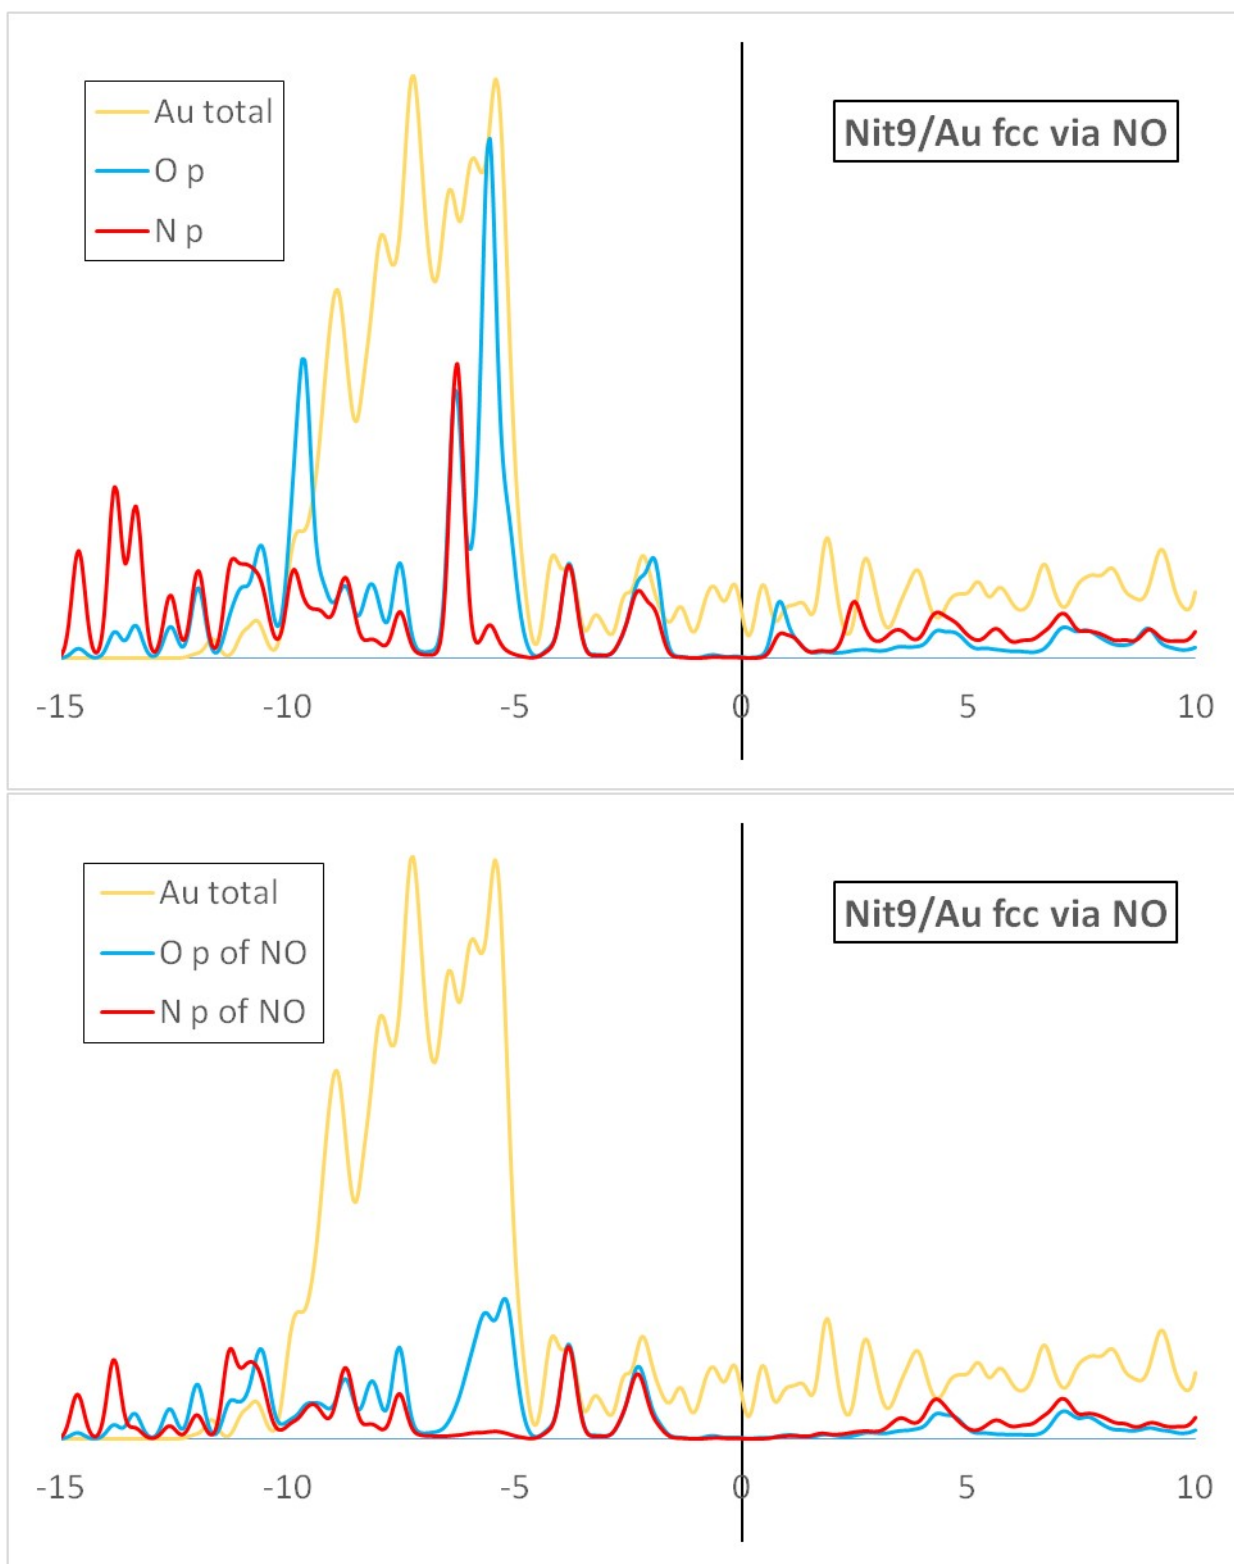

**Figure S10.** Partial density of states (PDOS) plots (energy in eV) for the adsorption of nit9 via the NO group onto the flat Au(111) surface. The upper panel shows the total (NO + CONH<sub>2</sub>) 2*p* states, and the lower panel only the 2*p* states of the NO group.

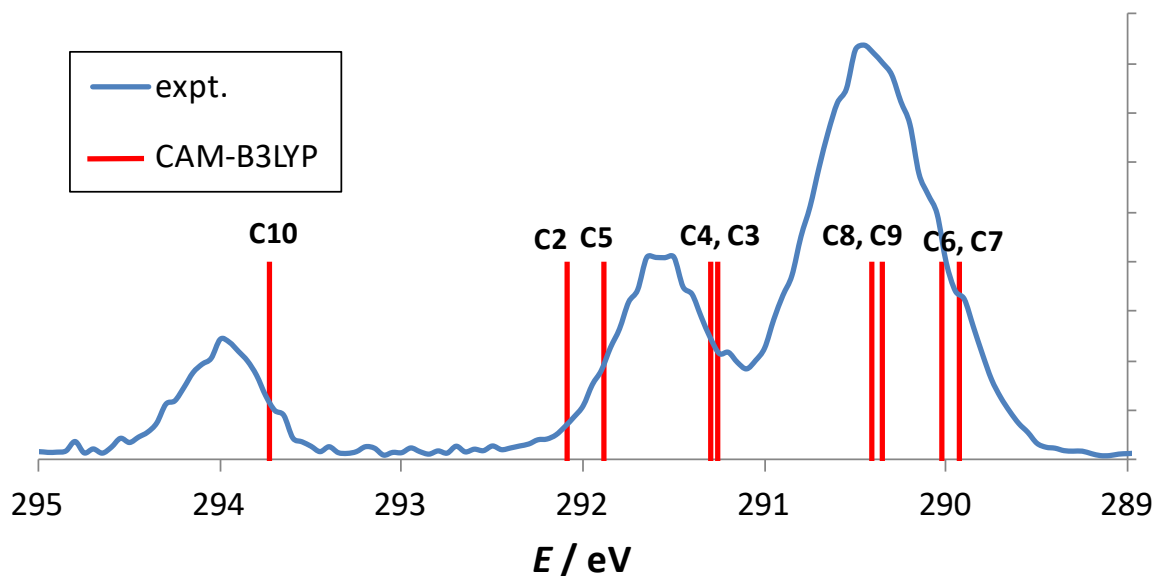

**Figure S11.** The calibration of the computational methods against the experimental gas phase C 1s XPS spectrum of nit9 (blue line). The red vertical rules show the positions of the CAM-B3LYP/ZORA-def2-TZVP C 1s orbital energies (the  $\beta$  spin set) with the numbering of the C atoms according to Figure 1. The orbital energies are shifted upwards by 11 eV.

**Table S5.** The calibration of the computational methods against the experimental gas phase N 1s and O 1s XPS spectra of nit9. The CAM-B3LYP/ZORA-def2-TZVP N 1s and O 1s orbital energies (the  $\beta$  spin set in eV) are given;  $\Delta$  = difference between the N and O atoms of the CONH<sub>2</sub> and NO groups.

| N 1s XPS expt.        |       | $\Delta$ expt. | CAM-B3LYP/<br>ZORA-def2-TZVP |           | $\Delta$ calc. |
|-----------------------|-------|----------------|------------------------------|-----------|----------------|
| CONH <sub>2</sub>     | NO    |                | CONH <sub>2</sub>            | NO        |                |
| 405.9                 | 406.7 | 0.8            | -393.1347                    | -394.2605 | 1.1            |
| <b>O 1s XPS expt.</b> |       |                |                              |           |                |
| 536.9                 | 537.3 | 0.4            | -522.8794                    | -523.1376 | 0.3            |

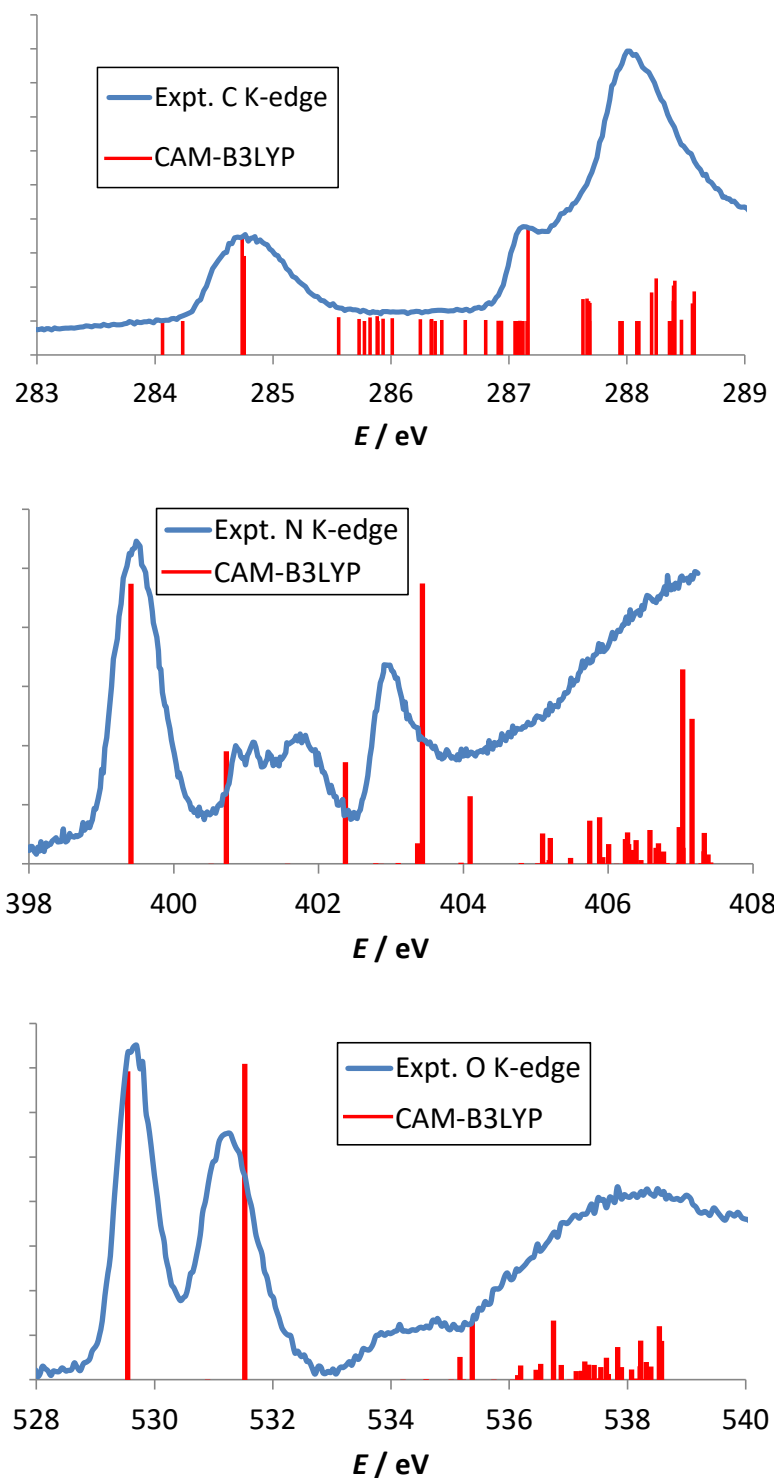

**Figure S12.** The calibration of the computational methods against the experimental gas phase NEXAFS spectra of nit9 (blue lines). The red vertical rules show the positions of the TD-CAM-B3LYP/ZORA-def2-TZVP excitation energies and oscillator strengths. The excitation energies were shifted upwards by 10.2 eV (C 1s), 12.2 eV (N 1s), and 13.8 eV (O 1s).



**Table S6.** The Voronoi charges for the nit9/Cu system and different modes of adsorption ( $\Delta$  = difference in charges on O or N atoms with respect to the isolated nit9: “+” sign = nit9 donates the charge to the surface; “-” sign = nit9 accepts the charge from the surface)

|                         |        | FLAT   |        |        | STEP   |        |                 |
|-------------------------|--------|--------|--------|--------|--------|--------|-----------------|
| O atoms                 | nit9   | hcp    | fcc    | CO     | CO     | NO     | NH <sub>2</sub> |
| NO                      | -0.214 | -0.264 | -0.264 | -0.219 | -0.220 | -0.234 | -0.211          |
| CONH <sub>2</sub>       | -0.265 | -0.262 | -0.263 | -0.253 | -0.230 | -0.264 | -0.242          |
| $\Delta(\text{NO})$     |        | -0.050 | -0.050 | -0.005 | -0.006 | -0.020 | 0.003           |
| $\Delta(\text{CONH}_2)$ |        | 0.003  | 0.002  | 0.012  | 0.035  | 0.001  | 0.023           |
| N atoms                 |        |        |        |        |        |        |                 |
| NO                      | 0.096  | -0.005 | -0.002 | 0.094  | 0.096  | 0.087  | 0.094           |
| CONH <sub>2</sub>       | -0.118 | -0.122 | -0.115 | -0.099 | -0.100 | -0.115 | -0.099          |
| $\Delta(\text{NO})$     |        | -0.101 | -0.098 | -0.002 | 0.000  | -0.009 | -0.002          |
| $\Delta(\text{CONH}_2)$ |        | -0.004 | 0.003  | 0.019  | 0.018  | 0.003  | 0.019           |

**Table S7.** The Voronoi charges for the nit9/Au system and different modes of adsorption ( $\Delta$  = difference in charges on O or N atoms with respect to the isolated nit9: “+” sign = nit9 donates the charge to the surface; “-” sign = nit9 accepts the charge from the surface)

| O atoms                 | nit9   | hcp    | fcc    | CO     | recline |
|-------------------------|--------|--------|--------|--------|---------|
| NO                      | -0.212 | -0.231 | -0.231 | -0.231 | -0.198  |
| CONH <sub>2</sub>       | -0.268 | -0.265 | -0.268 | -0.276 | -0.271  |
| $\Delta(\text{NO})$     |        | -0.019 | -0.019 | -0.019 | 0.014   |
| $\Delta(\text{CONH}_2)$ |        | 0.003  | 0.000  | -0.008 | -0.003  |
| N atoms                 |        |        |        |        |         |
| NO                      | 0.095  | 0.110  | 0.111  | 0.097  | 0.111   |
| CONH <sub>2</sub>       | -0.118 | -0.117 | -0.116 | -0.107 | -0.115  |
| $\Delta(\text{NO})$     |        | 0.015  | 0.016  | 0.002  | 0.016   |
| $\Delta(\text{CONH}_2)$ |        | 0.001  | 0.002  | 0.011  | 0.003   |

**Table S8.** Mulliken spin densities on the N and O atoms for the nit9/Cu system and different modes of adsorption ( $\Delta$  = difference between the  $\alpha$  and  $\beta$  spin densities)

|          | <b>nit9</b>                |              |                   |              | <b>hcp NO</b>                |              |                   |              |
|----------|----------------------------|--------------|-------------------|--------------|------------------------------|--------------|-------------------|--------------|
|          | NO                         |              | CONH <sub>2</sub> |              | NO                           |              | CONH <sub>2</sub> |              |
|          | N                          | O            | N                 | O            | N                            | O            | N                 | O            |
| $\alpha$ | 2.675                      | 3.310        | 2.216             | 3.017        | 2.467                        | 3.131        | 2.212             | 3.017        |
| $\beta$  | 2.239                      | 2.812        | 2.215             | 3.017        | 2.467                        | 3.129        | 2.211             | 3.017        |
| $\Delta$ | <b>0.436</b>               | <b>0.498</b> | <b>0.001</b>      | <b>0.000</b> | <b>0.000</b>                 | <b>0.002</b> | <b>0.001</b>      | <b>0.000</b> |
|          | <b>fcc NO</b>              |              |                   |              | <b>flat CONH<sub>2</sub></b> |              |                   |              |
|          | NO                         |              | CONH <sub>2</sub> |              | NO                           |              | CONH <sub>2</sub> |              |
|          | N                          | O            | N                 | O            | N                            | O            | N                 | O            |
| $\alpha$ | 2.461                      | 3.133        | 2.212             | 3.017        | 2.676                        | 3.313        | 2.194             | 3.013        |
| $\beta$  | 2.457                      | 3.130        | 2.212             | 3.017        | 2.245                        | 2.814        | 2.194             | 3.013        |
| $\Delta$ | <b>0.004</b>               | <b>0.003</b> | <b>0.000</b>      | <b>0.000</b> | <b>0.431</b>                 | <b>0.499</b> | <b>0.000</b>      | <b>0.000</b> |
|          | <b>step CO</b>             |              |                   |              | <b>step NO</b>               |              |                   |              |
|          | NO                         |              | CONH <sub>2</sub> |              | NO                           |              | CONH <sub>2</sub> |              |
|          | N                          | O            | N                 | O            | N                            | O            | N                 | O            |
| $\alpha$ | 2.675                      | 3.311        | 2.193             | 3.010        | 2.622                        | 3.213        | 2.212             | 3.016        |
| $\beta$  | 2.237                      | 2.817        | 2.193             | 3.009        | 2.247                        | 2.928        | 2.212             | 3.016        |
| $\Delta$ | <b>0.438</b>               | <b>0.494</b> | <b>0.000</b>      | <b>0.001</b> | <b>0.375</b>                 | <b>0.285</b> | <b>0.000</b>      | <b>0.000</b> |
|          | <b>step NH<sub>2</sub></b> |              |                   |              |                              |              |                   |              |
|          | NO                         |              | CONH <sub>2</sub> |              |                              |              |                   |              |
|          | N                          | O            | N                 | O            |                              |              |                   |              |
| $\alpha$ | 2.674                      | 3.309        | 2.249             | 3.000        |                              |              |                   |              |
| $\beta$  | 2.240                      | 2.810        | 2.249             | 3.000        |                              |              |                   |              |
| $\Delta$ | <b>0.434</b>               | <b>0.499</b> | <b>0.000</b>      | <b>0.000</b> |                              |              |                   |              |

**Table S9.** Mulliken spin densities on the N and O atoms for the nit9/Au system and different modes of adsorption ( $\Delta$  = difference between the  $\alpha$  and  $\beta$  spin densities)

|          | nit9         |              |                   |              |  | hcp NO                 |              |                   |              |
|----------|--------------|--------------|-------------------|--------------|--|------------------------|--------------|-------------------|--------------|
|          | NO           |              | CONH <sub>2</sub> |              |  | NO                     |              | CONH <sub>2</sub> |              |
|          | N            | O            | N                 | O            |  | N                      | O            | N                 | O            |
| $\alpha$ | 2.674        | 3.310        | 2.215             | 3.019        |  | 2.670                  | 3.263        | 2.212             | 3.019        |
| $\beta$  | 2.238        | 2.811        | 2.215             | 3.019        |  | 2.216                  | 2.832        | 2.212             | 3.018        |
| $\Delta$ | <b>0.436</b> | <b>0.499</b> | <b>0.000</b>      | <b>0.000</b> |  | <b>0.454</b>           | <b>0.431</b> | <b>0.000</b>      | <b>0.001</b> |
|          | fcc NO       |              |                   |              |  | flat CONH <sub>2</sub> |              |                   |              |
|          | NO           |              | CONH <sub>2</sub> |              |  | NO                     |              | CONH <sub>2</sub> |              |
|          | N            | O            | N                 | O            |  | N                      | O            | N                 | O            |
| $\alpha$ | 2.669        | 3.261        | 2.212             | 3.019        |  | 2.678                  | 3.317        | 2.201             | 3.004        |
| $\beta$  | 2.217        | 2.834        | 2.212             | 3.018        |  | 2.233                  | 2.828        | 2.201             | 3.004        |
| $\Delta$ | <b>0.452</b> | <b>0.427</b> | <b>0.000</b>      | <b>0.001</b> |  | <b>0.445</b>           | <b>0.489</b> | <b>0.000</b>      | <b>0.000</b> |
|          | parallel     |              |                   |              |  |                        |              |                   |              |
|          | NO           |              | CONH <sub>2</sub> |              |  |                        |              |                   |              |
|          | N            | O            | N                 | O            |  |                        |              |                   |              |
| $\alpha$ | 2.670        | 3.281        | 2.215             | 3.022        |  |                        |              |                   |              |
| $\beta$  | 2.216        | 2.826        | 2.215             | 3.022        |  |                        |              |                   |              |
| $\Delta$ | <b>0.454</b> | <b>0.455</b> | <b>0.000</b>      | <b>0.000</b> |  |                        |              |                   |              |

**Table S10.** The computed (TD-CAM-B3LYP/ZORA-def2-TZVP) C, N, and O 1s core-excited spectra (the excitation energies and corresponding oscillator strengths ( $f$ )) of the gas-phase monomer (M) and dimer (D) of nit9. The key difference is seen in the O 1s spectra (highlighted in red) where the strongest excitations to  $\pi^*(\text{NO})$  and  $\pi^*(\text{CONH}_2)$  are by 0.22 eV more separated in the dimer than in the monomer.

| C 1s    |      |         |      | N 1s    |      |         |      | O 1s    |      |         |      |
|---------|------|---------|------|---------|------|---------|------|---------|------|---------|------|
| M       | $f$  | D       | $f$  | M       | $f$  | D       | $f$  | M       | $f$  | D       | $f$  |
| 273.803 | 0.00 | 273.810 | 0.00 | 387.310 | 0.02 | 387.309 | 0.02 | 515.819 | 0.03 | 515.821 | 0.02 |
| 273.985 | 0.00 | 273.810 | 0.00 | 388.407 | 0.00 | 387.309 | 0.03 | 517.168 | 0.00 | 515.821 | 0.03 |
| 274.484 | 0.07 | 274.001 | 0.00 | 388.616 | 0.01 | 387.984 | 0.00 | 517.793 | 0.03 | 517.477 | 0.00 |
| 274.494 | 0.00 | 274.001 | 0.00 | 389.430 | 0.00 | 387.985 | 0.00 | 520.464 | 0.00 | 517.477 | 0.00 |
| 275.335 | 0.00 | 274.492 | 0.04 | 390.201 | 0.01 | 388.241 | 0.01 | 520.852 | 0.00 | 518.020 | 0.00 |
| 275.497 | 0.00 | 274.493 | 0.07 | 390.692 | 0.00 | 388.241 | 0.02 | 520.852 | 0.00 | 518.020 | 0.04 |
| 275.540 | 0.00 | 274.514 | 0.01 | 390.701 | 0.00 | 389.610 | 0.00 | 521.173 | 0.00 | 520.504 | 0.00 |
| 275.590 | 0.00 | 274.514 | 0.02 | 391.005 | 0.00 | 389.610 | 0.00 | 521.322 | 0.00 | 520.504 | 0.00 |
| 275.679 | 0.00 | 275.370 | 0.00 | 391.224 | 0.02 | 390.293 | 0.02 | 521.450 | 0.00 | 520.565 | 0.00 |
| 275.694 | 0.00 | 275.370 | 0.00 | 391.284 | 0.01 | 390.293 | 0.01 | 521.598 | 0.01 | 520.565 | 0.00 |

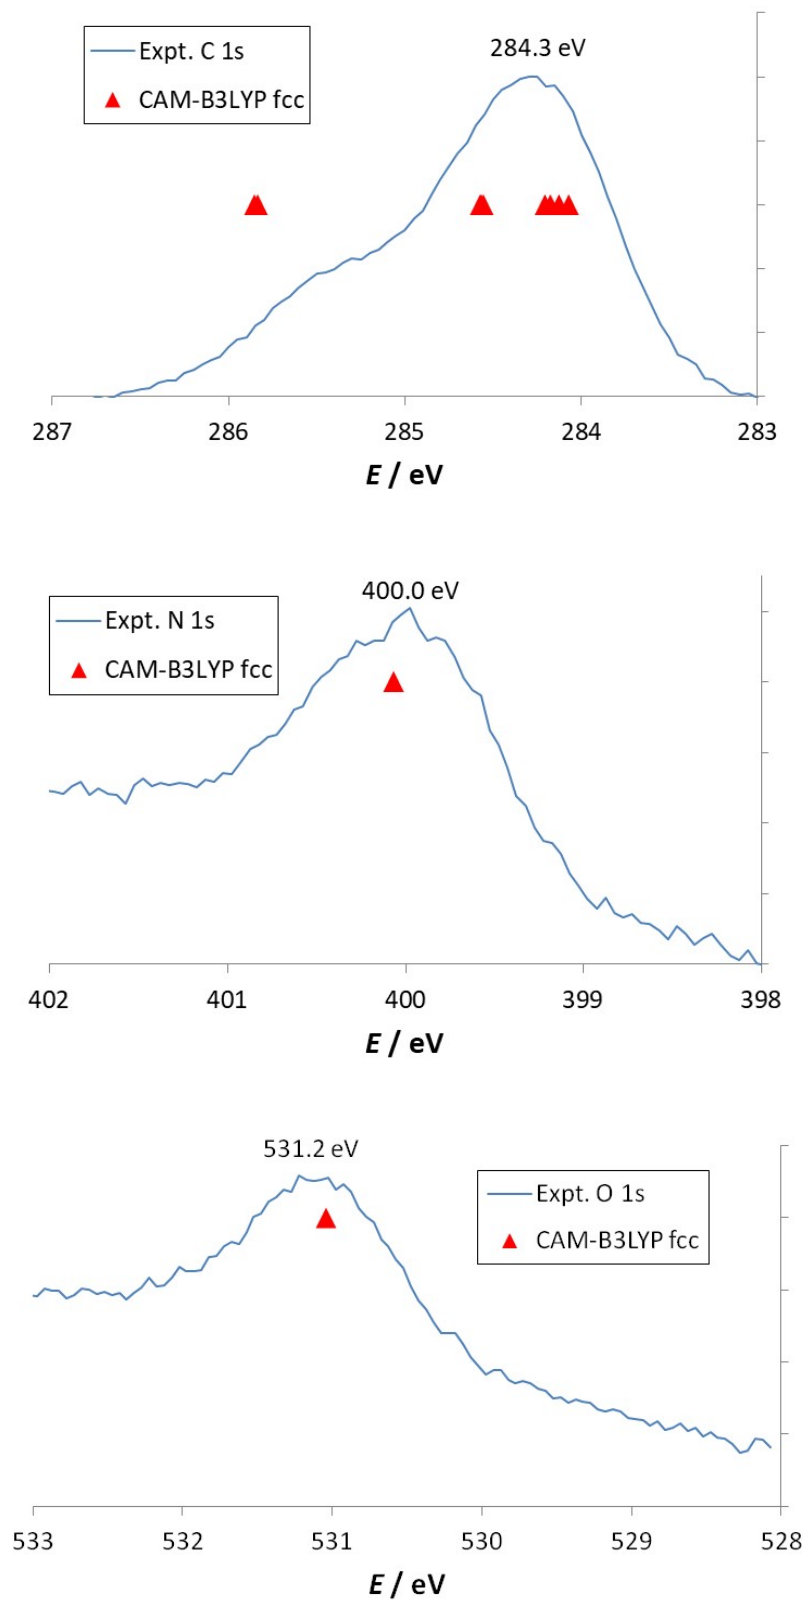

**Figure S13.** The experimental and modelled (CAM-B3LYP/ ZORA-def2-TZVP) XPS spectra of the TEMPO/Au system (fcc = adsorption via NO on the flat surface above the fcc site). The upward energy shifts of 5.0 (C 1s), 5.4 (N 1s), and 7.5 eV (O 1s) were applied for the modelled spectra.

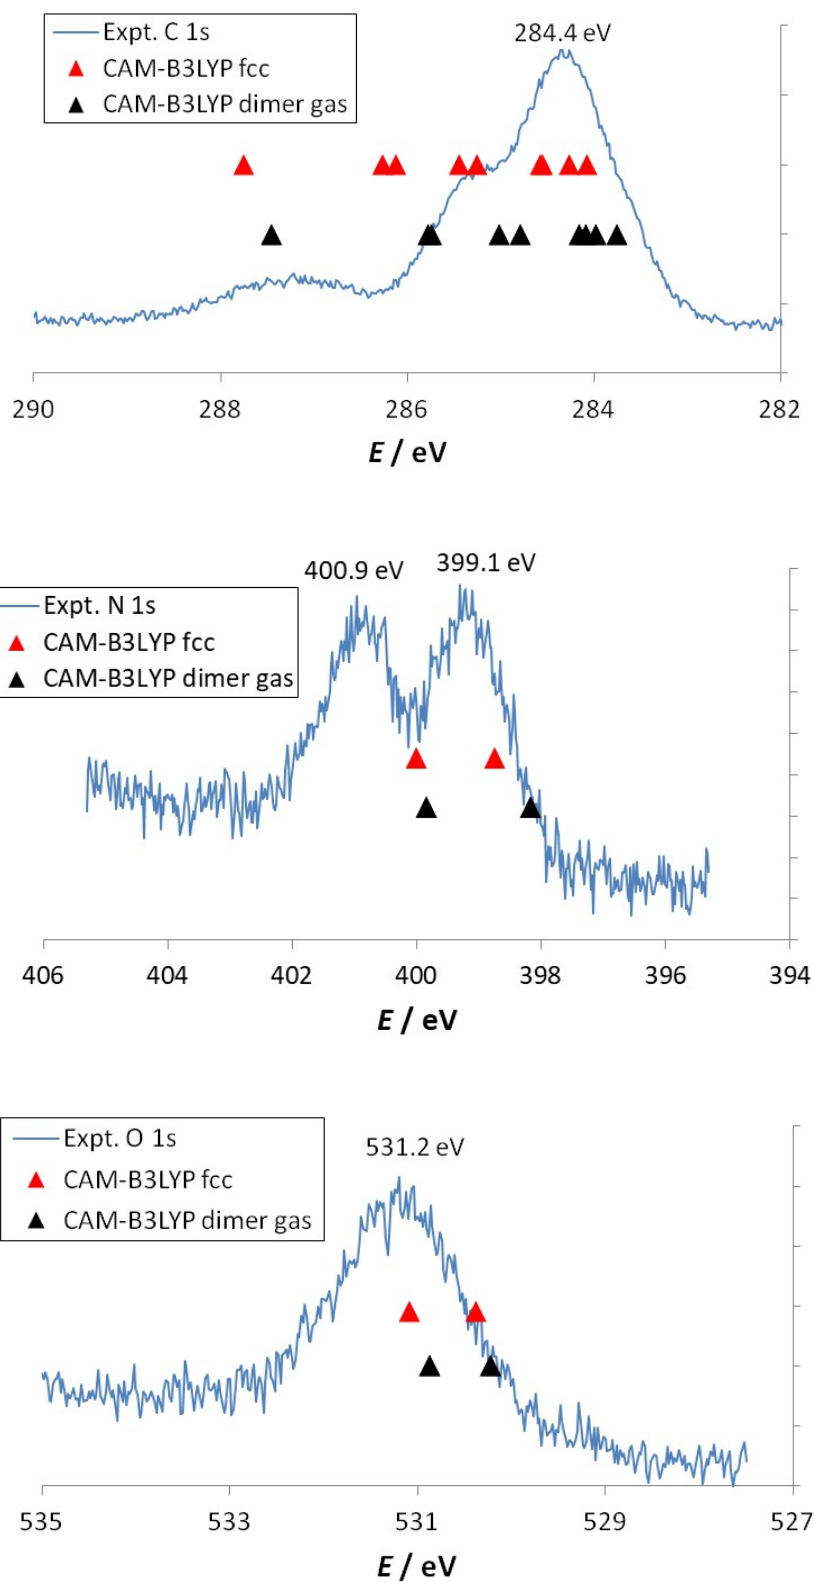

**Figure S14.** The experimental and modelled (CAM-B3LYP/ ZORA-def2-TZVP) XPS spectra of the nit8/Au system (fcc = adsorption via NO on the flat surface above the fcc site). The upward energy shifts of 5.0 (C 1s), 5.4 (N 1s), and 7.5 eV (O 1s) were applied for the modelled spectra.

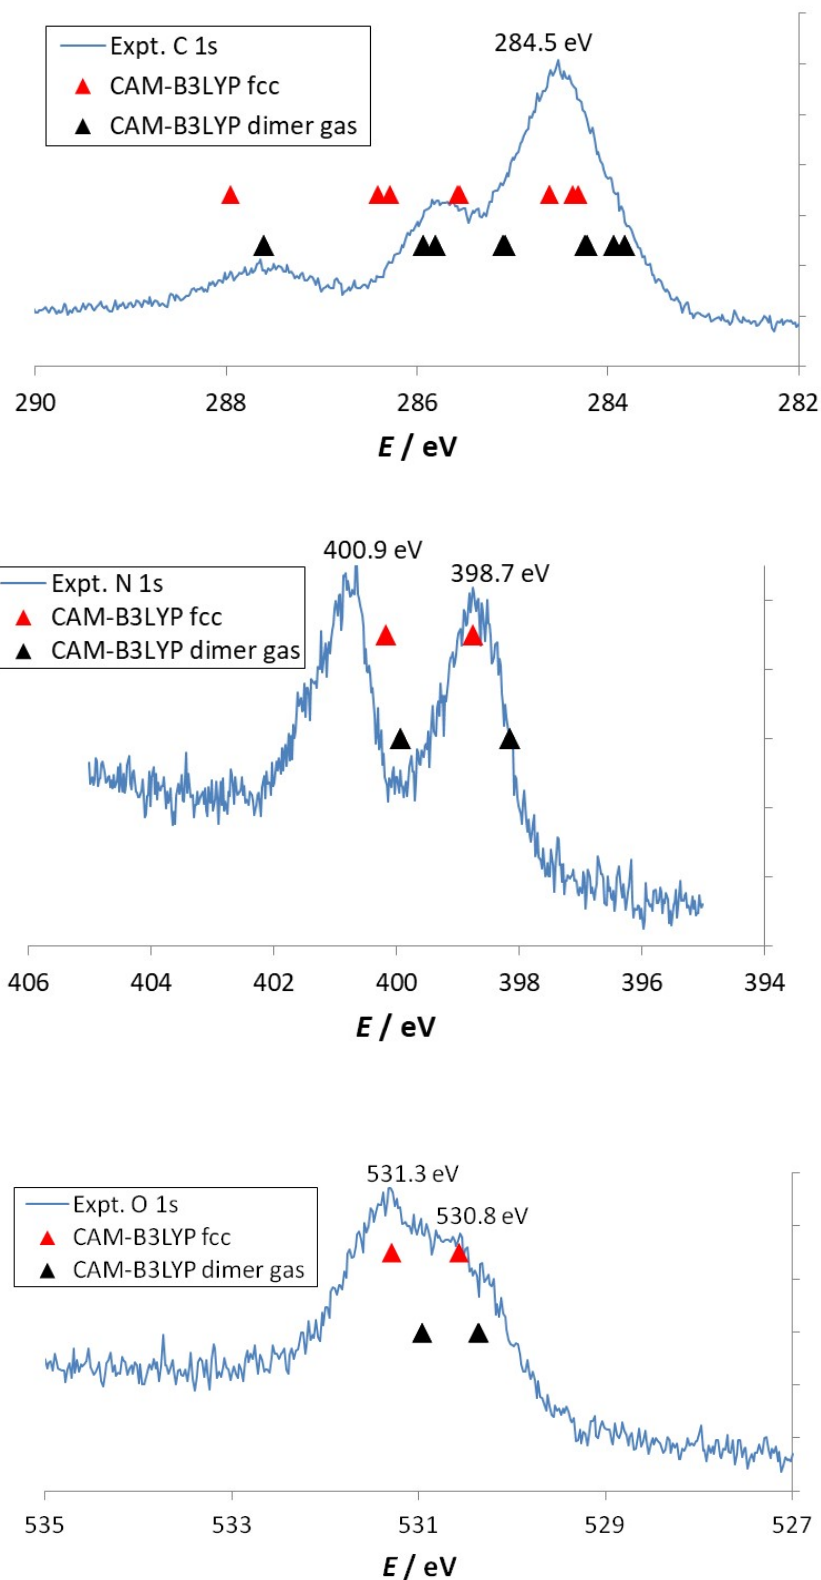

**Figure S15.** The experimental and modelled (CAM-B3LYP/ ZORA-def2-TZVP) XPS spectra of the nit9/Au system (fcc = adsorption via NO on the flat surface above the fcc site). The upward energy shifts of 5.0 (C 1s), 5.4 (N 1s), and 7.5 eV (O 1s) were applied for the modelled spectra.

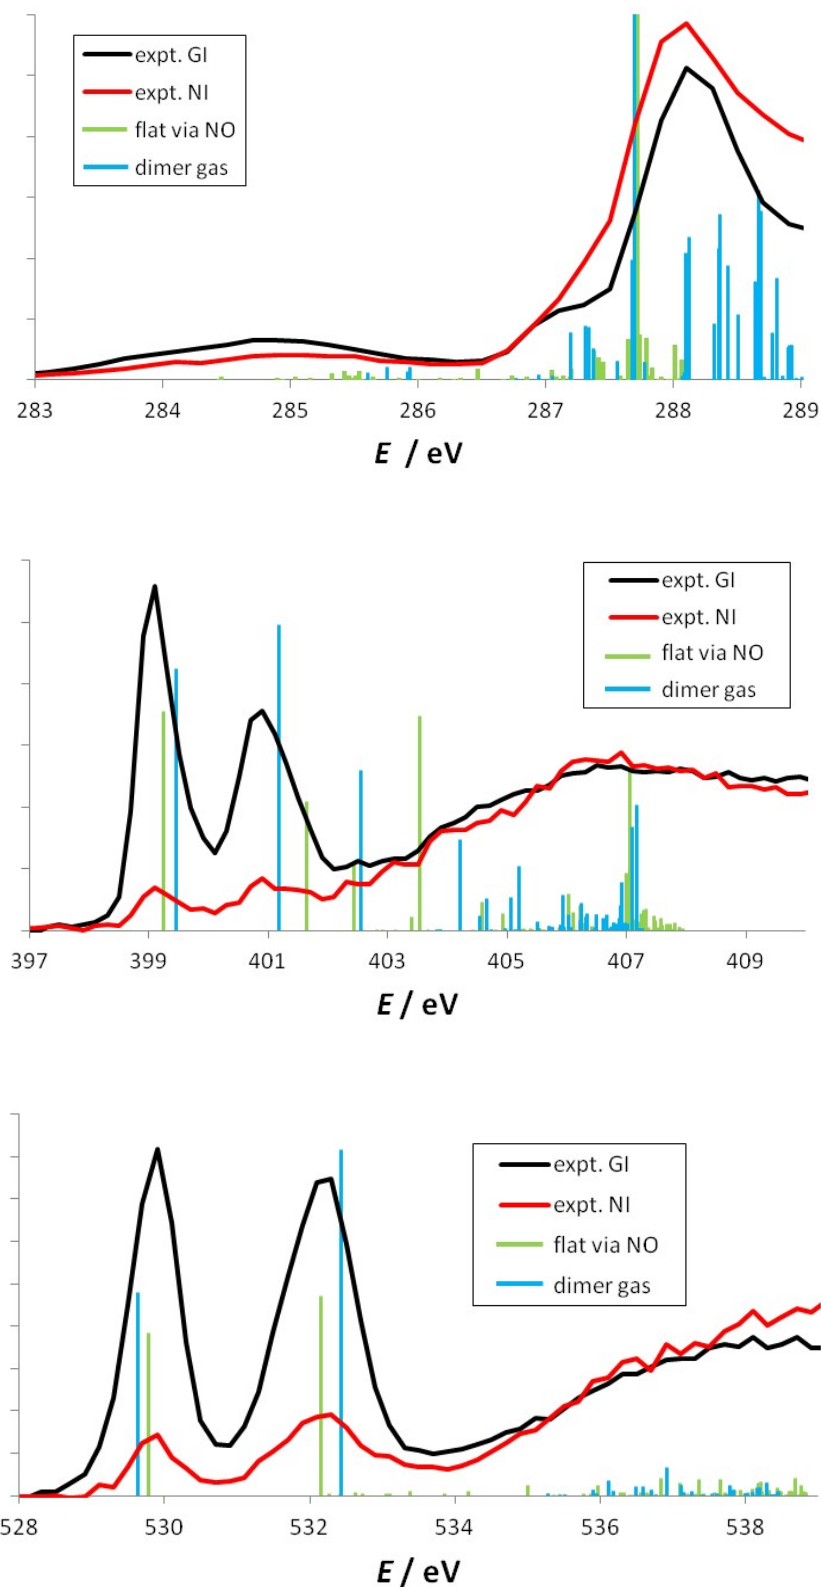

**Figure S16.** The experimental and modelled (CAM-B3LYP/ ZORA-def2-TZVP) NEXAFS spectra of the nit8/Au system (flat via NO = adsorption via NO on the flat surface above the fcc site). The upward energy shifts of 10.2 (C 1s), 12.2 (N 1s), and 13.8 eV (O 1s) were applied for the modelled spectra.



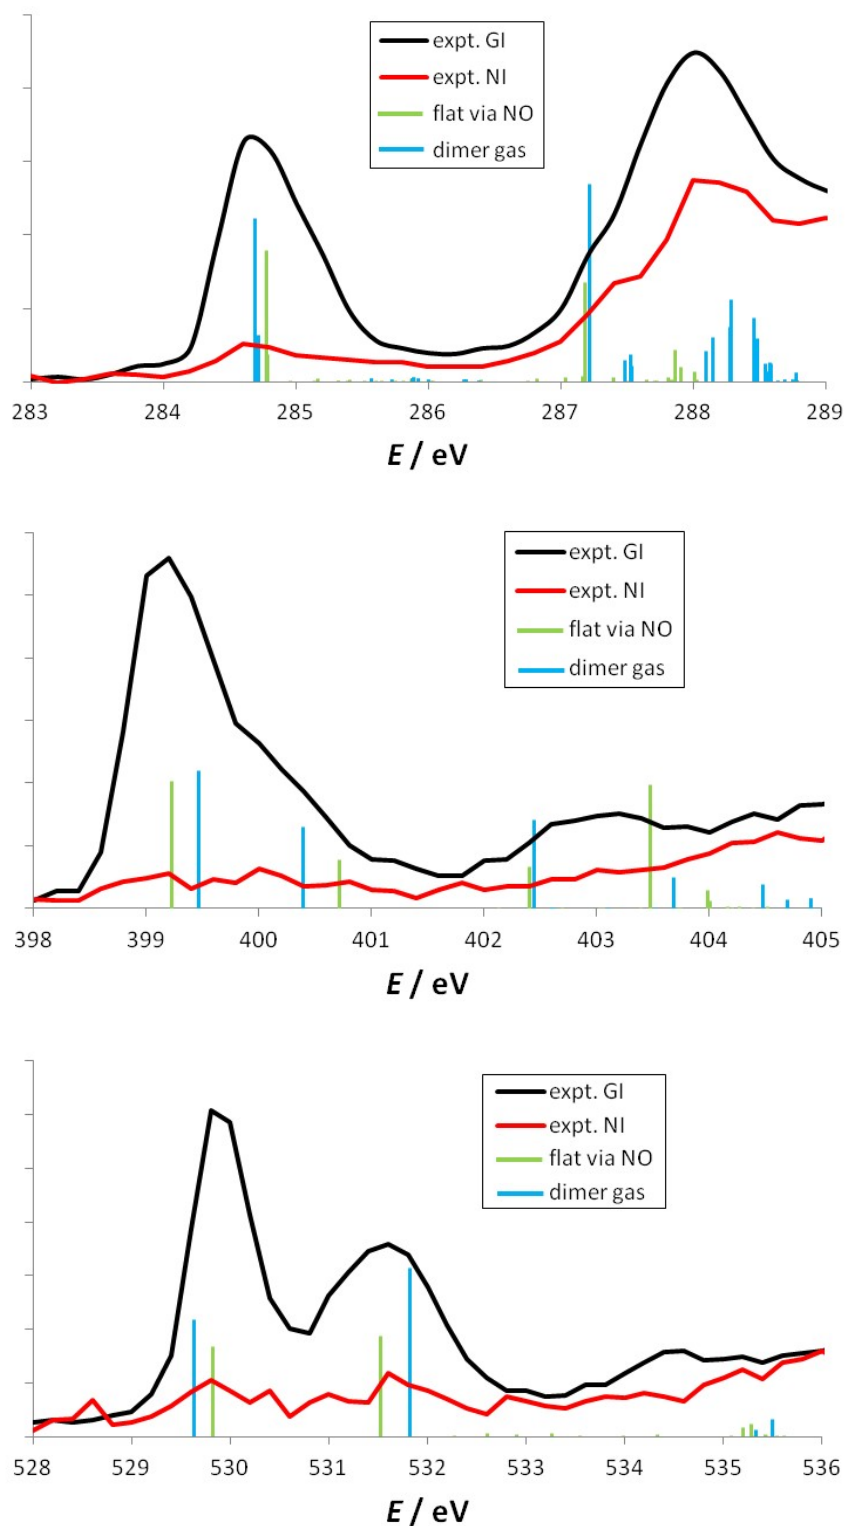

**Figure S17.** The experimental and modelled (CAM-B3LYP/ ZORA-def2-TZVP) NEXAFS spectra of the nit9/Au system (flat via NO = adsorption via NO on the flat surface above the fcc site). The upward energy shifts of 10.2 (C 1s), 12.2 (N 1s), and 13.8 eV (O 1s) were applied for the modelled spectra.

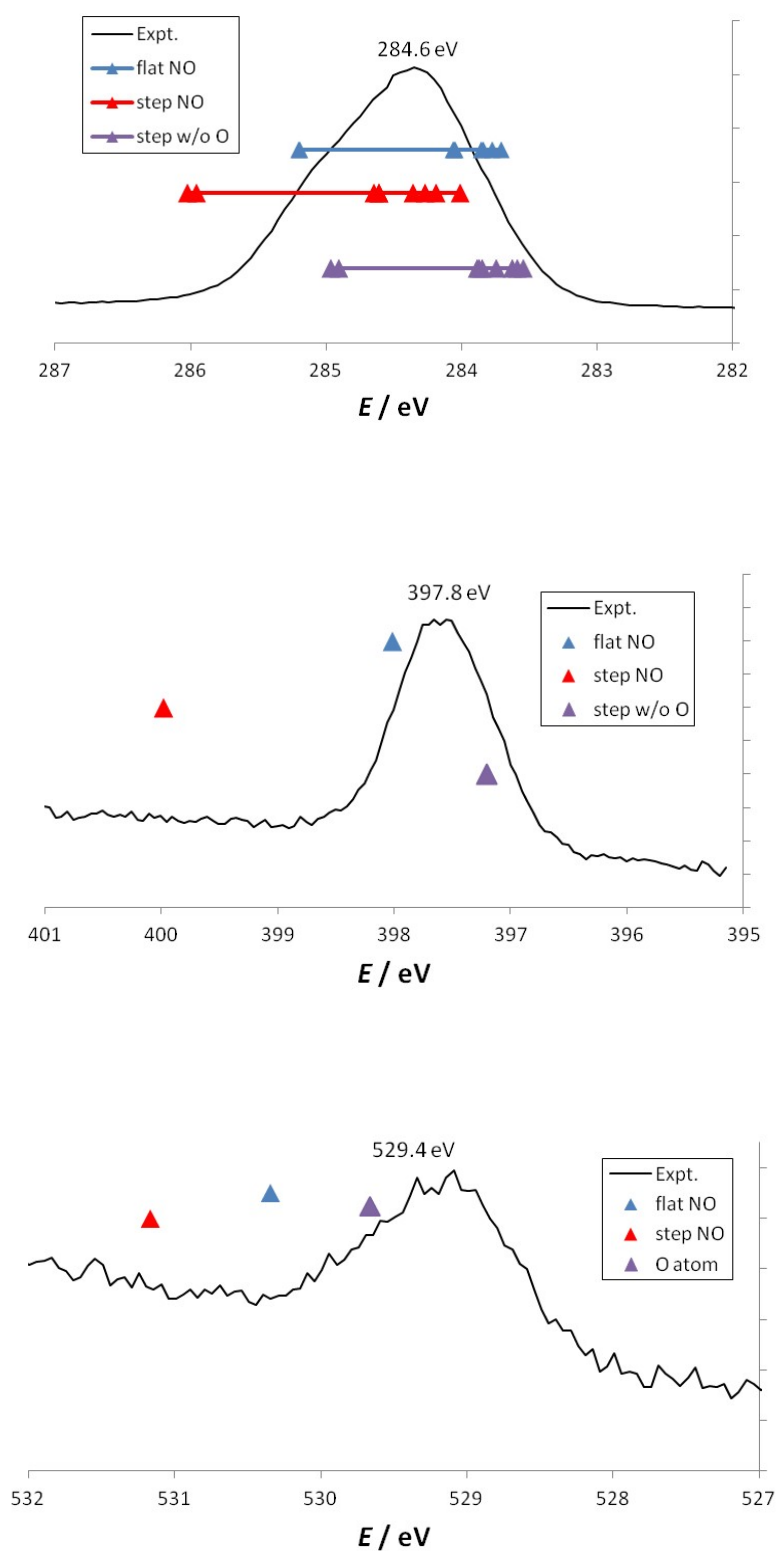

**Figure S18.** The experimental and modelled (CAM-B3LYP/ ZORA-def2-TZVP) XPS spectra of the TEMPO/Cu system. The upward energy shifts of 5.0 (C 1s), 5.4 (N 1s), and 7.5 eV (O 1s) were applied for the modelled spectra.

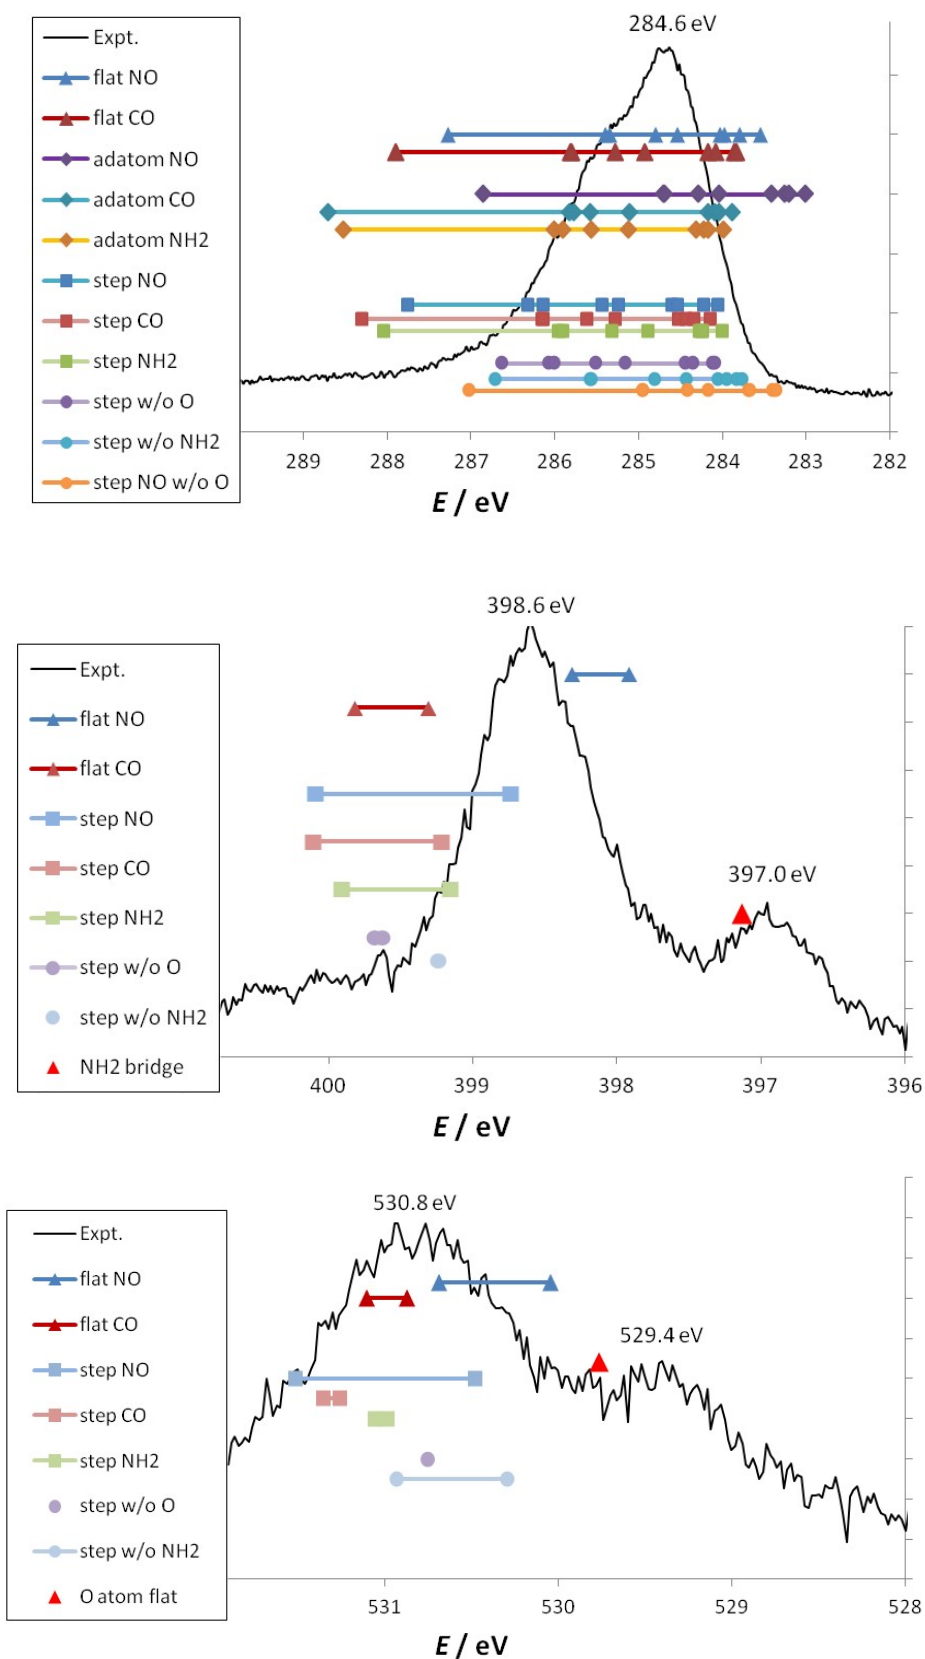

**Figure S19.** The experimental and modelled (CAM-B3LYP/ ZORA-def2-TZVP) XPS spectra of the nit8/Cu system. The upward energy shifts of 5.0 (C 1s), 5.4 (N 1s), and 7.6 eV (O 1s) were applied for the modelled spectra.

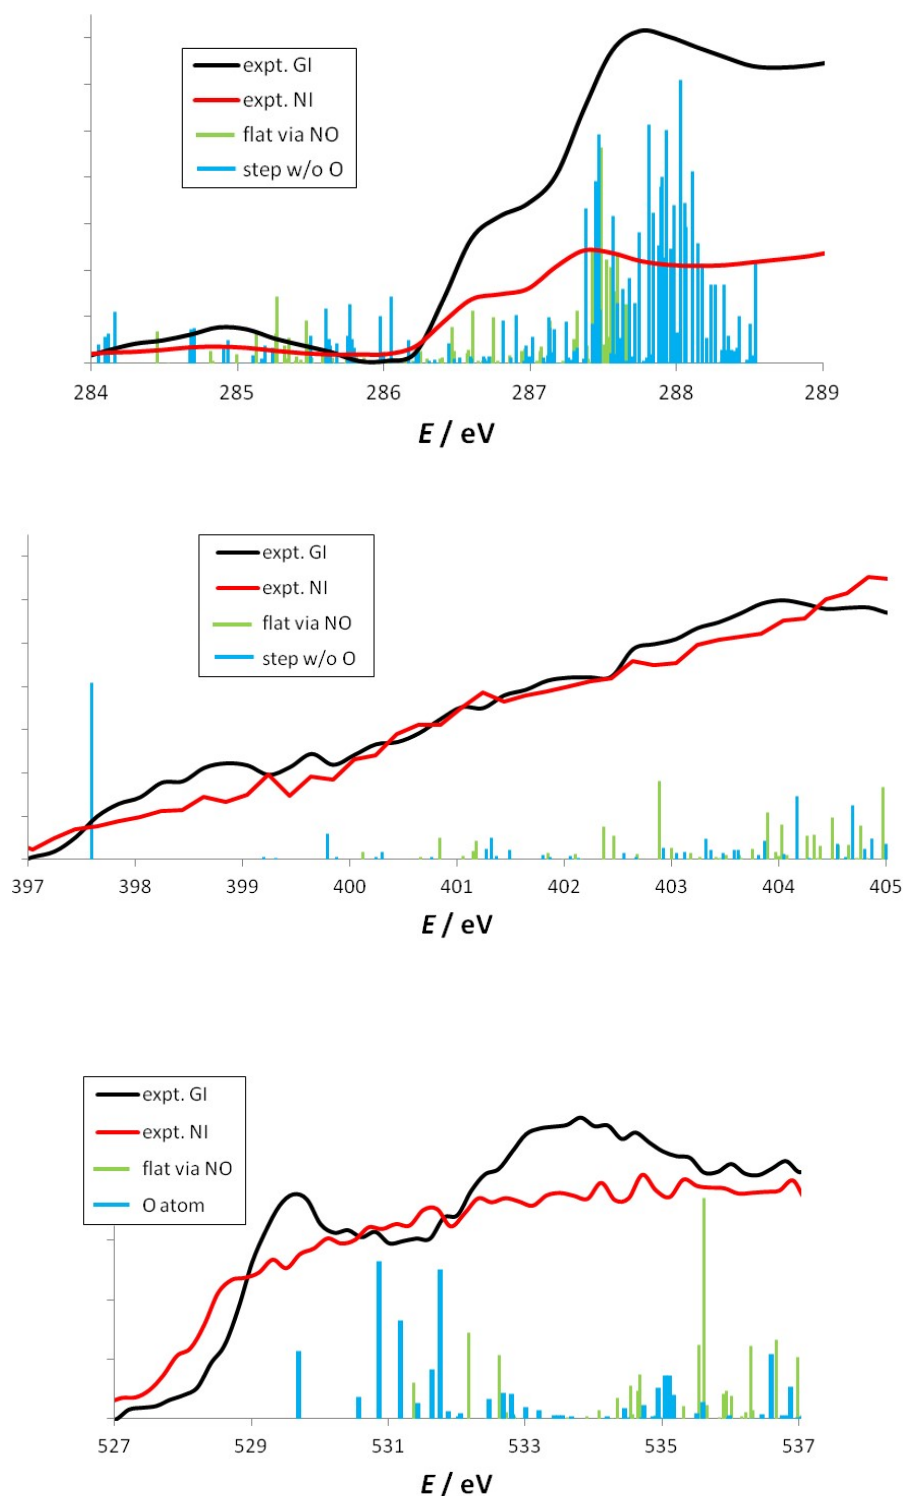

**Figure S20.** The experimental and modelled (CAM-B3LYP/ ZORA-def2-TZVP) NEXAFS spectra of the TEMPO/Cu system. The upward energy shifts of 10.2 (C 1s), 12.2 (N 1s), and 13.8 eV (O 1s) were applied for the modelled spectra.

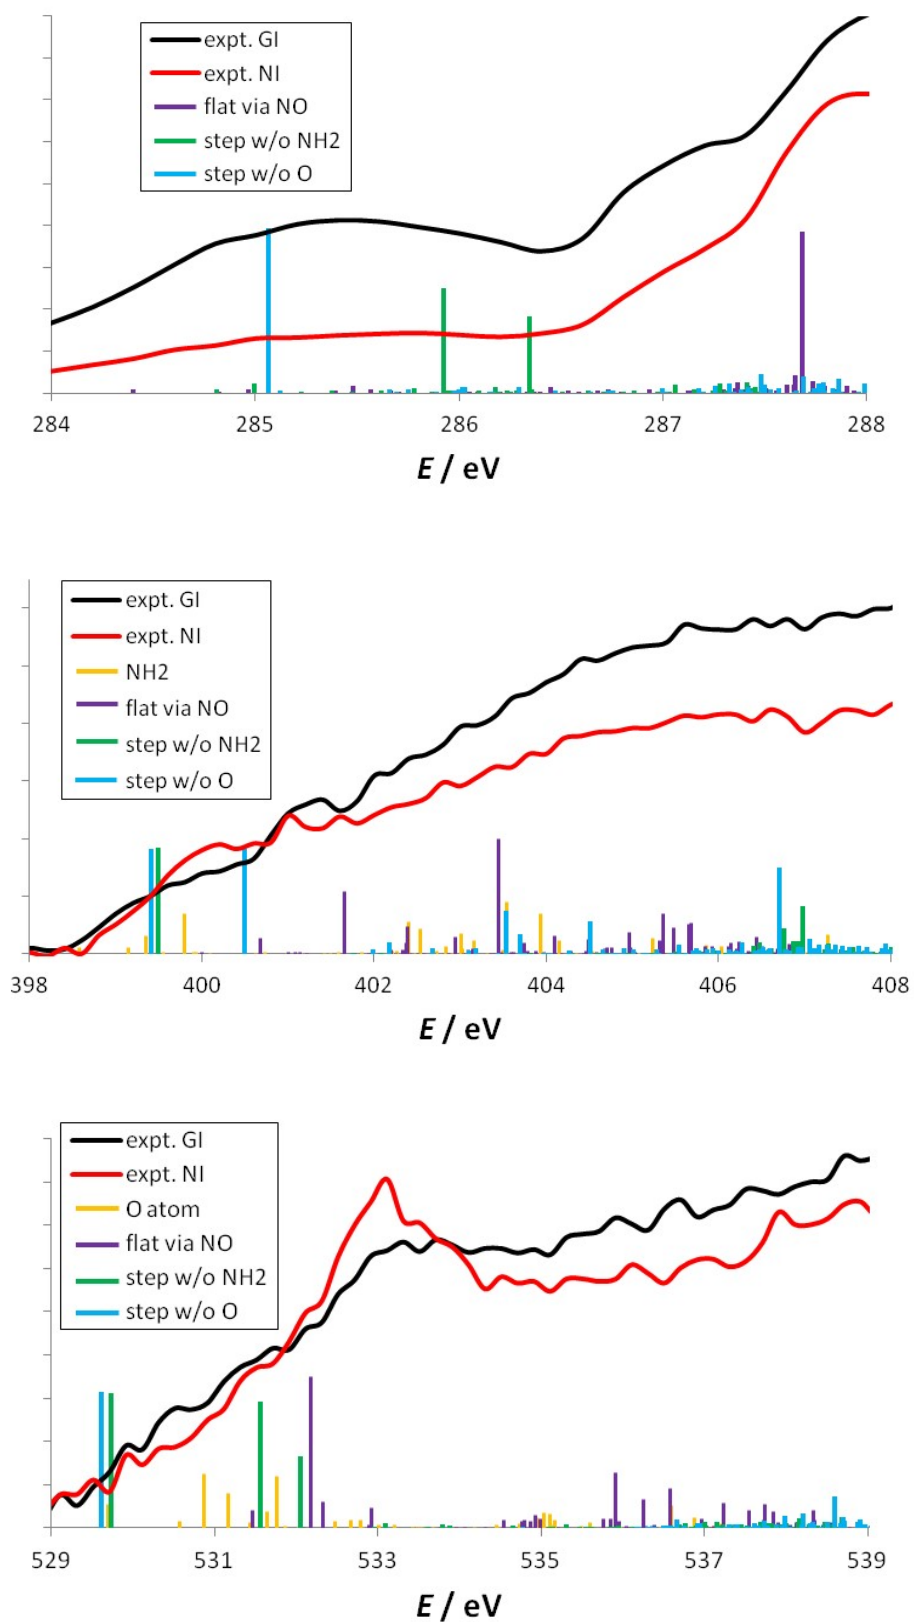

**Figure S21.** The experimental and modelled (CAM-B3LYP/ ZORA-def2-TZVP) NEXAFS spectra of the nit8/Cu system. The upward energy shifts of 10.2 (C 1s), 12.2 (N 1s), and 13.8 eV (O 1s) were applied for the modelled spectra.

**Table S11.** The details of computing the reaction energies (page 11 in the manuscript) for the decomposition of the CONH<sub>2</sub> anchor on the Cu step atoms are given in the following table ( $E_{ads}$  = adsorption energy;  $E_r$  = reaction energy; w/o = without). The energies of the C=O and C-NH<sub>2</sub> bonds were computed in vacuo at the M06-2X-D3/cc-pVTZ level using the Gaussian 16 suite (Gaussian 16, Revision C.01, M. J. Frisch et al. Gaussian, Inc., Wallingford CT, 2016.)

|                                                  | eV    | kcal mol <sup>-1</sup> |
|--------------------------------------------------|-------|------------------------|
| $E_{ads}$ via CO (on-top step)                   | -0.97 |                        |
| $E_{ads}$ nit9 w/o O (on-top step)               | -1.99 |                        |
| $E_{ads}$ O atom (hcp flat)                      | -5.39 |                        |
| $E(\text{C}=\text{O}$ bond)                      | -6.79 |                        |
| $E_r$ (C=O scission)                             | 0.38  | 8.8                    |
| $E_{ads}$ via NH <sub>2</sub> (on-top step)      | -0.69 |                        |
| $E_{ads}$ nit9 w/o NH <sub>2</sub> (on-top step) | -1.96 |                        |
| $E_{ads}$ NH <sub>2</sub> (bridge flat)          | -2.72 |                        |
| $E(\text{C}-\text{NH}_2$ bond) g16               | -4.30 |                        |
| $E_r$ (C-NH <sub>2</sub> scission)               | 0.32  | 7.3                    |

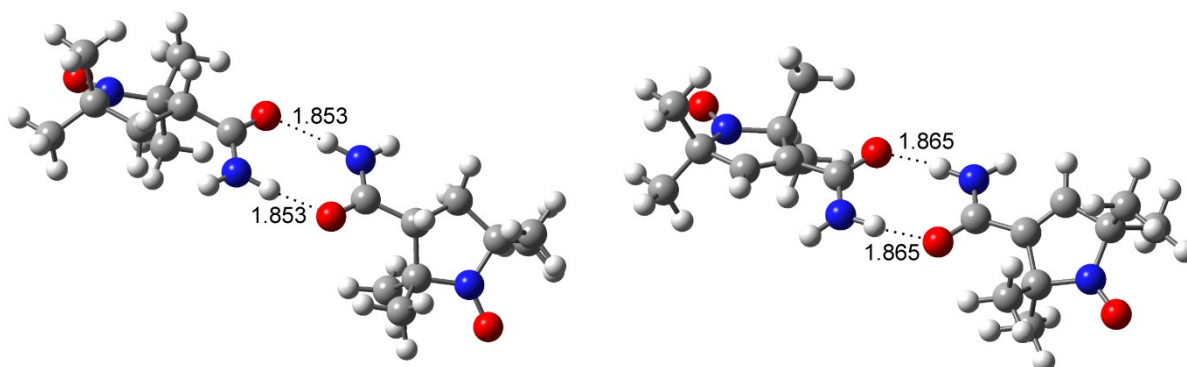

**Figure S22.** Optimized structures (B3LYP/6-31+G(d,p)) of the hydrogen-bonded dimers of nit8 and nit9. The H-bond lengths are given in Å.

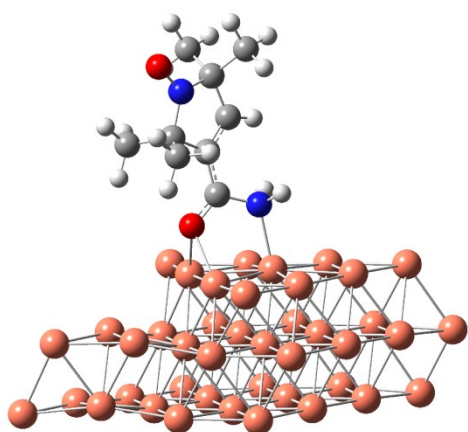

**Figure S23.** The structure in the nit9/Cu system with both carbonyl and amino group bonded to the Cu step and terrace atoms. The relevant geometric parameters are discussed in the main text. The full Cartesian coordinates and lattice vectors are given below (“Nit9 on Cu step via CO and NH<sub>2</sub>”).

The Cartesian coordinates and lattice vectors (in Å) for all the structures studied

TEMPO on flat Au(111) hcp site

|             |             |             |    |
|-------------|-------------|-------------|----|
| -0.08633524 | 0.08067474  | -0.21190765 | Au |
| 2.82264463  | 0.07562360  | -0.24672167 | Au |
| 5.77470870  | 0.07079518  | -0.23054821 | Au |
| 1.36851148  | 2.62121698  | -0.25490625 | Au |
| 4.29321654  | 2.61430599  | -0.24671109 | Au |
| 7.22615837  | 2.61126783  | -0.22843425 | Au |
| 2.83231544  | 5.14328309  | -0.24835759 | Au |
| 5.75357270  | 5.13883526  | -0.23045555 | Au |
| 8.67569353  | 5.14704090  | -0.21666202 | Au |
| 1.39055186  | 0.89253777  | -2.74117779 | Au |
| 4.31730042  | 0.89144856  | -2.72303461 | Au |
| 7.24484346  | 0.89195666  | -2.71380175 | Au |
| 2.85579158  | 3.42345154  | -2.75315738 | Au |
| 5.77697332  | 3.42290792  | -2.73474066 | Au |
| 8.70240167  | 3.42615748  | -2.73046994 | Au |
| 4.31691333  | 5.95488610  | -2.75753327 | Au |
| 7.24039373  | 5.95190442  | -2.74685191 | Au |
| 10.16469560 | 5.95139727  | -2.73579634 | Au |
| -0.04338183 | 1.70127114  | -5.22230759 | Au |
| 2.88157874  | 1.70151093  | -5.20937928 | Au |
| 5.80450037  | 1.70191017  | -5.19465267 | Au |
| 1.42034747  | 4.23371101  | -5.23291816 | Au |
| 4.34327887  | 4.23416100  | -5.21826906 | Au |
| 7.26610023  | 4.23369145  | -5.20552166 | Au |
| 2.88171344  | 6.76382757  | -5.24180042 | Au |
| 5.80534972  | 6.76429778  | -5.22992285 | Au |
| 8.72922348  | 6.76511815  | -5.21745625 | Au |
| -0.02256693 | -0.01162270 | -7.71678884 | Au |
| 2.90042284  | -0.01147103 | -7.70074901 | Au |
| 5.82708419  | -0.01065766 | -7.68818437 | Au |
| 1.43841525  | 2.52187132  | -7.72824520 | Au |
| 4.36403252  | 2.52198651  | -7.71376999 | Au |
| 7.28888892  | 2.52216742  | -7.70346847 | Au |
| 2.90211127  | 5.05239367  | -7.74211392 | Au |
| 5.82557198  | 5.05266308  | -7.73011697 | Au |
| 8.74967832  | 5.05186411  | -7.71476797 | Au |
| 3.43567347  | 0.07037654  | 6.02556777  | H  |
| 1.76111340  | 0.67550809  | 6.17479449  | H  |
| 3.43191601  | 2.13758352  | 7.40260367  | H  |
| 2.59477894  | 3.06059159  | 6.13341604  | H  |
| 5.08678099  | 3.50973817  | 6.05524892  | H  |
| 5.41154478  | 1.75644499  | 5.94170288  | H  |
| 1.45419970  | 1.86494575  | 2.57209922  | H  |
| 0.45256807  | 1.19097239  | 3.89955886  | H  |
| 1.33590836  | 2.73507405  | 4.14799833  | H  |
| 3.39473979  | -1.14112553 | 3.77861437  | H  |
| 1.65767035  | -1.06210576 | 4.28342588  | H  |
| 2.14658671  | -0.59994562 | 2.60760078  | H  |
| 3.02423933  | 4.19703311  | 4.16752856  | H  |
| 4.64080497  | 4.80211220  | 3.67343410  | H  |



|            |             |            |   |
|------------|-------------|------------|---|
| 3.66905550 | 3.83970417  | 2.52063865 | H |
| 6.08943794 | 2.79631992  | 2.43580691 | H |
| 6.70710569 | 3.35649614  | 4.03421287 | H |
| 6.53750173 | 1.58708596  | 3.68485091 | H |
| 3.90040471 | 1.42577181  | 3.56815177 | N |
| 2.61576008 | 0.89196874  | 4.17589135 | C |
| 2.75688557 | 0.90616894  | 5.72907548 | C |
| 3.31597497 | 2.22576204  | 6.29700395 | C |
| 4.68042726 | 2.55126331  | 5.65648863 | C |
| 4.63932337 | 2.64208529  | 4.10052014 | C |
| 1.40049287 | 1.73135067  | 3.67740377 | C |
| 2.44796553 | -0.56651143 | 3.67679717 | C |
| 3.94130906 | 3.94129563  | 3.59555397 | C |
| 6.07975312 | 2.58849339  | 3.52798398 | C |
| 4.17619739 | 1.05076629  | 2.35842400 | O |

outcell: Unit cell vectors (Ang):

|          |           |           |
|----------|-----------|-----------|
| 8.772206 | 0.000845  | 0.038505  |
| 4.386948 | 7.593798  | -0.037425 |
| 0.140360 | -0.221859 | 26.985405 |

**TEMPO on flat Au(111) fcc site**

|             |             |             |    |
|-------------|-------------|-------------|----|
| -0.13669095 | 0.06995618  | -0.31429845 | Au |
| 2.78442354  | 0.07787304  | -0.28094404 | Au |
| 5.71695966  | 0.06071531  | -0.27525378 | Au |
| 1.32440782  | 2.60471301  | -0.30530822 | Au |
| 4.25107208  | 2.60786311  | -0.27338058 | Au |
| 7.18466134  | 2.61834340  | -0.27004028 | Au |
| 2.80093974  | 5.12749600  | -0.28352289 | Au |
| 5.72193324  | 5.14740547  | -0.26902293 | Au |
| 8.64537651  | 5.14917207  | -0.22304835 | Au |
| 1.35822498  | 0.89448940  | -2.80849045 | Au |
| 4.28354610  | 0.89963150  | -2.76843496 | Au |
| 7.21001139  | 0.90281391  | -2.73303844 | Au |
| 2.82637513  | 3.42572026  | -2.79748378 | Au |
| 5.74828848  | 3.43264856  | -2.76421101 | Au |
| 8.67880783  | 3.43828582  | -2.72977543 | Au |
| 4.29095531  | 5.95858081  | -2.79276007 | Au |
| 7.21699612  | 5.96469205  | -2.75851455 | Au |
| 10.14440118 | 5.96304750  | -2.71967746 | Au |
| -0.07029340 | 1.69756259  | -5.30382354 | Au |
| 2.85519062  | 1.70236595  | -5.25701518 | Au |
| 5.78017666  | 1.70808217  | -5.22481710 | Au |
| 1.39579680  | 4.23061019  | -5.29502823 | Au |
| 4.32140761  | 4.23527838  | -5.25229803 | Au |
| 7.24532075  | 4.24053728  | -5.21766988 | Au |
| 2.86345256  | 6.76278023  | -5.28772413 | Au |
| 5.78661776  | 6.76900659  | -5.24489079 | Au |
| 8.71297473  | 6.77465702  | -5.20749727 | Au |
| -0.03635989 | -0.01721227 | -7.80145294 | Au |
| 2.88574691  | -0.01199187 | -7.75831155 | Au |
| 5.81277083  | -0.00713668 | -7.71880601 | Au |
| 1.43002202  | 2.51750664  | -7.79221379 | Au |
| 4.35320950  | 2.52180455  | -7.74868712 | Au |
| 7.28112821  | 2.52623056  | -7.71344719 | Au |

|            |             |             |    |
|------------|-------------|-------------|----|
| 2.89517094 | 5.04713144  | -7.78522844 | Au |
| 5.82070478 | 5.05616761  | -7.74545989 | Au |
| 8.74555678 | 5.05983631  | -7.70698770 | Au |
| 5.08350969 | 0.63394044  | 6.09139372  | H  |
| 3.39854794 | 1.20347700  | 6.26205354  | H  |
| 5.04574416 | 2.68739489  | 7.49210731  | H  |
| 4.18847010 | 3.60732556  | 6.23386781  | H  |
| 6.67399964 | 4.09500563  | 6.15012120  | H  |
| 7.02404746 | 2.34763444  | 6.02301058  | H  |
| 2.99960489 | 2.40089211  | 2.68411333  | H  |
| 2.05590457 | 1.75895610  | 4.07276234  | H  |
| 2.95176911 | 3.30418450  | 4.24331428  | H  |
| 5.01286930 | -0.57793240 | 3.92327012  | H  |
| 3.24217923 | -0.47955808 | 4.27926734  | H  |
| 3.87613022 | -0.01605624 | 2.65076762  | H  |
| 4.64481252 | 4.81396905  | 4.30012414  | H  |
| 6.24985613 | 5.39366493  | 3.74035760  | H  |
| 5.22475306 | 4.42942903  | 2.63386073  | H  |
| 7.69896137 | 3.43681060  | 2.53519346  | H  |
| 8.31687970 | 3.91922999  | 4.15812185  | H  |
| 8.11861906 | 2.16992027  | 3.73484661  | H  |
| 5.49482698 | 2.02940719  | 3.64029905  | N  |
| 4.22935292 | 1.46313207  | 4.25995381  | C  |
| 4.38494891 | 1.45890912  | 5.81074290  | C  |
| 4.92396842 | 2.78299375  | 6.38784159  | C  |
| 6.28073673 | 3.13364001  | 5.74507353  | C  |
| 6.23610239 | 3.23700367  | 4.19049554  | C  |
| 2.99261635 | 2.28987274  | 3.79219068  | C  |
| 4.08440708 | 0.00871778  | 3.74200774  | C  |
| 5.53794242 | 4.54134850  | 3.69709038  | C  |
| 7.67799063 | 3.18475804  | 3.61751823  | C  |
| 5.71267746 | 1.73737293  | 2.39605444  | O  |

outcell: Unit cell vectors (Ang):

|          |           |           |
|----------|-----------|-----------|
| 8.775240 | 0.015291  | 0.119267  |
| 4.399819 | 7.598025  | 0.021589  |
| 0.355930 | -0.155341 | 27.447026 |

**TEMPO on flat Au(111) parallel**

|             |            |             |    |
|-------------|------------|-------------|----|
| -0.10992106 | 0.07992750 | -0.81232828 | Au |
| 2.80478789  | 0.07780714 | -0.80830133 | Au |
| 5.73809575  | 0.07078823 | -0.81091077 | Au |
| 1.34149785  | 2.60777951 | -0.83656938 | Au |
| 4.26806065  | 2.61554712 | -0.83956579 | Au |
| 7.18570172  | 2.61078218 | -0.72700470 | Au |
| 2.80464117  | 5.13697105 | -0.81987535 | Au |
| 5.72569115  | 5.13930413 | -0.76739843 | Au |
| 8.64499148  | 5.13905112 | -0.71004443 | Au |
| 1.37930925  | 0.89532730 | -3.33581781 | Au |
| 4.29952129  | 0.89693381 | -3.31290600 | Au |
| 7.22294435  | 0.89908457 | -3.25547531 | Au |
| 2.83803613  | 3.42805898 | -3.34325808 | Au |
| 5.76595533  | 3.42744512 | -3.29664526 | Au |
| 8.67677405  | 3.42570075 | -3.24045183 | Au |

|             |             |             |    |
|-------------|-------------|-------------|----|
| 4.29997167  | 5.95354926  | -3.31839490 | Au |
| 7.21818006  | 5.95208977  | -3.27874181 | Au |
| 10.13426195 | 5.94518092  | -3.25087732 | Au |
| -0.04858939 | 1.71283033  | -5.84052155 | Au |
| 2.86816979  | 1.71083009  | -5.80324556 | Au |
| 5.78867062  | 1.70957547  | -5.76500912 | Au |
| 1.40958314  | 4.23967838  | -5.84238820 | Au |
| 4.32909735  | 4.23996322  | -5.79507325 | Au |
| 7.24699137  | 4.23972292  | -5.74796731 | Au |
| 2.86964955  | 6.76797122  | -5.83355719 | Au |
| 5.78496994  | 6.76741945  | -5.78547029 | Au |
| 8.70300626  | 6.76675577  | -5.75199949 | Au |
| -0.01505420 | 0.00432639  | -8.34076874 | Au |
| 2.90033525  | 0.00280719  | -8.29740227 | Au |
| 5.82172141  | 0.00217633  | -8.25426123 | Au |
| 1.44266936  | 2.53422130  | -8.34062805 | Au |
| 4.36120630  | 2.53234656  | -8.29527058 | Au |
| 7.27996063  | 2.53179037  | -8.25386837 | Au |
| 2.90314881  | 5.06129953  | -8.33470365 | Au |
| 5.82066876  | 5.06364550  | -8.29074293 | Au |
| 8.73673346  | 5.05999141  | -8.25172920 | Au |
| 4.88417972  | 4.54916898  | 5.02242888  | H  |
| 4.18568045  | 5.27396713  | 3.54607565  | H  |
| 6.54728813  | 4.43274421  | 3.17042455  | H  |
| 5.40012606  | 3.60426780  | 2.10115792  | H  |
| 6.96426662  | 1.93142461  | 3.14969055  | H  |
| 6.56627841  | 2.53919306  | 4.78395695  | H  |
| 1.72373803  | 2.49788246  | 2.81456751  | H  |
| 1.91699658  | 4.28362455  | 2.63123706  | H  |
| 3.10410788  | 3.17748171  | 1.87986727  | H  |
| 2.86080970  | 3.68418225  | 6.24962484  | H  |
| 2.10964982  | 4.89702158  | 5.14456134  | H  |
| 1.41772503  | 3.23384750  | 5.27570277  | H  |
| 4.53236517  | 1.48673298  | 1.69524436  | H  |
| 5.43981160  | 0.01302325  | 2.13701757  | H  |
| 3.68293716  | 0.14456461  | 2.54187911  | H  |
| 4.64026218  | -0.63896732 | 4.82988757  | H  |
| 6.37813405  | -0.26057636 | 4.49049206  | H  |
| 5.52819866  | 0.52689477  | 5.87368872  | H  |
| 3.74253202  | 1.95329525  | 4.43645162  | N  |
| 3.28573544  | 3.36893719  | 4.10375946  | C  |
| 4.52392793  | 4.30963454  | 3.99320470  | C  |
| 5.68883826  | 3.71943196  | 3.17286261  | C  |
| 6.14230267  | 2.36954780  | 3.76478977  | C  |
| 5.00119198  | 1.31308048  | 3.86908522  | C  |
| 2.46680327  | 3.32603993  | 2.77725425  | C  |
| 2.36071936  | 3.82061030  | 5.26528265  | C  |
| 4.64010022  | 0.70926655  | 2.48091461  | C  |
| 5.40716152  | 0.16458211  | 4.82897114  | C  |
| 2.84734373  | 1.15195050  | 4.88978905  | O  |

outcell: Unit cell vectors (Ang):

|          |           |           |
|----------|-----------|-----------|
| 8.754377 | -0.001780 | 0.130209  |
| 4.374821 | 7.586114  | 0.006889  |
| 0.351645 | -0.214546 | 30.303382 |

**TEMPO on flat Cu(111) fcc site**

|             |             |             |    |
|-------------|-------------|-------------|----|
| -0.03016113 | -0.04617272 | 0.00014950  | Cu |
| 2.58190880  | -0.01907685 | 0.08201233  | Cu |
| 5.19172242  | 0.00595413  | 0.11543118  | Cu |
| 7.81317394  | 0.02116416  | 0.12921213  | Cu |
| 1.30101972  | 2.22103966  | 0.05578388  | Cu |
| 3.90445139  | 2.24365910  | 0.11768418  | Cu |
| 6.51301471  | 2.25701051  | 0.12890105  | Cu |
| 9.13729764  | 2.27430252  | 0.11160979  | Cu |
| 2.60433618  | 4.47992118  | 0.09840723  | Cu |
| 5.21614222  | 4.49845562  | 0.14027207  | Cu |
| 7.83109270  | 4.51867935  | 0.16783190  | Cu |
| 10.45309510 | 4.53277010  | 0.20481081  | Cu |
| 3.92718300  | 6.73909166  | 0.12131176  | Cu |
| 6.53964657  | 6.74837686  | 0.18066439  | Cu |
| 9.15484863  | 6.77278499  | 0.21747977  | Cu |
| 11.77226918 | 6.79642041  | 0.23777580  | Cu |
| 1.30315976  | 0.75983618  | -2.08869819 | Cu |
| 3.91138488  | 0.78474453  | -2.03280513 | Cu |
| 6.54288282  | 0.79133083  | -2.01786688 | Cu |
| 9.16836278  | 0.80558961  | -2.00730897 | Cu |
| 2.64662811  | 3.03086745  | -2.07854312 | Cu |
| 5.23257763  | 3.04557440  | -2.05763971 | Cu |
| 7.82296830  | 3.05260381  | -2.03225936 | Cu |
| 10.49388537 | 3.06168813  | -1.95967510 | Cu |
| 3.93453963  | 5.26218593  | -2.05227214 | Cu |
| 6.51977565  | 5.25831126  | -2.02115122 | Cu |
| 9.16529964  | 5.28073675  | -1.93666137 | Cu |
| 11.78454995 | 5.33122827  | -1.90865642 | Cu |
| 5.24996846  | 7.48468886  | -2.02213077 | Cu |
| 7.85071163  | 7.53983125  | -1.92466688 | Cu |
| 10.47422614 | 7.56572027  | -1.91003818 | Cu |
| 13.10749838 | 7.59121965  | -1.88260192 | Cu |
| 0.00995223  | 1.50536141  | -4.28996763 | Cu |
| 2.61271962  | 1.51781164  | -4.18524640 | Cu |
| 5.23940179  | 1.49629939  | -4.13877416 | Cu |
| 7.86618617  | 1.53368807  | -4.17444421 | Cu |
| 1.31126028  | 3.76976478  | -4.22792213 | Cu |
| 3.90257012  | 3.77866476  | -4.23889886 | Cu |
| 6.60213966  | 3.73646178  | -4.24738857 | Cu |
| 9.19544691  | 3.80997311  | -4.09994169 | Cu |
| 2.61144799  | 6.04608093  | -4.15133185 | Cu |
| 5.24011950  | 6.07104290  | -4.21644609 | Cu |
| 7.89628776  | 6.06906939  | -4.02715419 | Cu |
| 10.48821043 | 6.07949407  | -4.07053234 | Cu |
| 3.96479791  | 8.28553230  | -4.17420776 | Cu |
| 6.58600739  | 8.30439419  | -4.08730937 | Cu |
| 9.19347503  | 8.31679260  | -4.04991453 | Cu |
| 11.81688109 | 8.33141142  | -4.06368945 | Cu |
| 8.08159245  | 4.15823959  | -7.36055981 | H  |
| 4.52561361  | 1.89843227  | -7.52484407 | H  |
| 7.04911736  | 4.30328655  | -9.59216282 | H  |
| 4.93067138  | 2.96125383  | -9.66718724 | H  |
| 7.77416861  | 5.22526457  | -7.28217271 | C  |
| 8.51254293  | 5.85607311  | -7.82680076 | H  |

|            |            |              |   |
|------------|------------|--------------|---|
| 3.69077210 | 2.62786291 | -7.42822165  | C |
| 6.44821221 | 5.22476668 | -9.40256604  | C |
| 4.34627677 | 3.89278632 | -9.47448078  | C |
| 2.81904608 | 2.26146802 | -8.01650063  | H |
| 7.83717832 | 5.51503475 | -6.20314368  | H |
| 5.24012823 | 4.89852321 | -11.19670190 | H |
| 7.03045098 | 6.07591813 | -9.82441506  | H |
| 5.45426818 | 4.35981409 | -7.27726286  | N |
| 5.09058125 | 5.07712478 | -10.10602683 | C |
| 6.34725396 | 5.44192402 | -7.85563630  | C |
| 3.37548844 | 2.64827724 | -6.35698060  | H |
| 4.12406019 | 4.03060484 | -7.93193003  | C |
| 3.34848342 | 3.74238057 | -9.94777853  | H |
| 5.33660834 | 4.46962452 | -5.84721975  | O |
| 4.49156782 | 6.01454631 | -10.02879677 | H |
| 5.88571314 | 6.89420430 | -7.53860381  | C |
| 3.00036805 | 5.06398380 | -7.62827761  | C |
| 6.69548178 | 7.61915071 | -7.78064301  | H |
| 2.00545903 | 4.65845953 | -7.92157479  | H |
| 5.66533565 | 7.01101747 | -6.44955379  | H |
| 2.95449977 | 5.27913090 | -6.53349285  | H |
| 4.97715570 | 7.19959514 | -8.09865951  | H |
| 3.14047948 | 6.02966143 | -8.15768925  | H |

outcell: Unit cell vectors (Ang):

|           |          |           |
|-----------|----------|-----------|
| 10.465080 | 0.072750 | 0.144516  |
| 5.295487  | 9.028781 | 0.134356  |
| 0.321090  | 0.157764 | 25.577888 |

**TEMPO on flat Cu(111) hcp site**

|             |            |             |    |
|-------------|------------|-------------|----|
| 0.04808891  | 0.03181277 | -0.00385565 | Cu |
| 2.68889103  | 0.05654044 | -0.01149805 | Cu |
| 5.31204755  | 0.08026302 | 0.00177513  | Cu |
| 7.94018728  | 0.10514852 | -0.01770452 | Cu |
| 1.38578833  | 2.29324261 | 0.03594079  | Cu |
| 4.02133095  | 2.31673295 | 0.01832390  | Cu |
| 6.64516545  | 2.33491831 | -0.00468898 | Cu |
| 9.26943473  | 2.36677776 | -0.01734751 | Cu |
| 2.73521585  | 4.54294330 | 0.04983122  | Cu |
| 5.35487479  | 4.56636254 | 0.02448881  | Cu |
| 7.97898289  | 4.58865307 | 0.00515763  | Cu |
| 10.60191862 | 4.61979373 | 0.00305517  | Cu |
| 4.06661911  | 6.78983031 | 0.04112096  | Cu |
| 6.69022798  | 6.81667563 | 0.00391489  | Cu |
| 9.31992660  | 6.83970844 | 0.01388408  | Cu |
| 11.95043234 | 6.86668627 | 0.00058182  | Cu |
| 1.36793827  | 0.77829699 | -2.11966980 | Cu |
| 3.99587737  | 0.80815414 | -2.12879479 | Cu |
| 6.62361972  | 0.79754199 | -2.15164012 | Cu |
| 9.24713355  | 0.84711249 | -2.17237047 | Cu |
| 2.68840074  | 3.02592290 | -2.09636839 | Cu |
| 5.33862450  | 3.05298601 | -2.15288006 | Cu |
| 7.90687923  | 3.05948305 | -2.16936252 | Cu |
| 10.55357664 | 3.09296859 | -2.14739753 | Cu |

|             |            |              |    |
|-------------|------------|--------------|----|
| 4.05348461  | 5.28118830 | -2.12668704  | Cu |
| 6.65979595  | 5.29608814 | -2.18038471  | Cu |
| 9.24644280  | 5.31665716 | -2.15507986  | Cu |
| 11.91137469 | 5.33211837 | -2.13040555  | Cu |
| 5.38052180  | 7.51738065 | -2.13420059  | Cu |
| 8.01018605  | 7.53745553 | -2.14728348  | Cu |
| 10.63940639 | 7.57143073 | -2.13963869  | Cu |
| 13.26564625 | 7.59717160 | -2.15771117  | Cu |
| -0.00463277 | 1.46028426 | -4.28308277  | Cu |
| 2.63029802  | 1.49448121 | -4.27618900  | Cu |
| 5.26272598  | 1.50368929 | -4.27599420  | Cu |
| 7.88986027  | 1.51945326 | -4.32243115  | Cu |
| 1.33669424  | 3.70466887 | -4.23571466  | Cu |
| 3.94884901  | 3.73481838 | -4.21294380  | Cu |
| 6.61896142  | 3.73629218 | -4.37012991  | Cu |
| 9.24520636  | 3.76629688 | -4.26024495  | Cu |
| 2.67011361  | 5.96328557 | -4.21979665  | Cu |
| 5.28606462  | 6.03566345 | -4.33077774  | Cu |
| 7.98686641  | 6.07253888 | -4.33198237  | Cu |
| 10.59033555 | 6.03375002 | -4.24424988  | Cu |
| 4.00334979  | 8.22981357 | -4.26572279  | Cu |
| 6.63468331  | 8.29187996 | -4.22997720  | Cu |
| 9.28894417  | 8.30477586 | -4.25286281  | Cu |
| 11.90109288 | 8.28905527 | -4.31937765  | Cu |
| 9.45266322  | 4.99354828 | -7.52527205  | H  |
| 5.87229702  | 2.72929349 | -7.59837167  | H  |
| 8.40012106  | 5.13228787 | -9.74091652  | H  |
| 6.27410858  | 3.78020306 | -9.76643810  | H  |
| 9.15204984  | 6.06250590 | -7.45571883  | C  |
| 9.87564425  | 6.68212507 | -8.03231330  | H  |
| 5.05133577  | 3.47419813 | -7.49648625  | C  |
| 7.79547036  | 6.05060275 | -9.54789135  | C  |
| 5.69144404  | 4.71321859 | -9.57721736  | C  |
| 4.15844214  | 3.10642498 | -8.05044042  | H  |
| 9.24234647  | 6.37652070 | -6.38673433  | H  |
| 6.56900853  | 5.69932517 | -11.32076246 | H  |
| 8.36783654  | 6.90263213 | -9.98190553  | H  |
| 6.82798251  | 5.19410264 | -7.40534589  | N  |
| 6.42991117  | 5.89152335 | -10.23112530 | C  |
| 7.71415697  | 6.27297756 | -8.00171815  | C  |
| 4.77089215  | 3.51844794 | -6.41567540  | H  |
| 5.48680917  | 4.86501154 | -8.03341193  | C  |
| 4.68910735  | 4.56091657 | -10.03899071 | H  |
| 6.73894549  | 5.28703182 | -5.97829764  | O  |
| 5.83378192  | 6.83141465 | -10.16089676 | H  |
| 7.24996719  | 7.72264866 | -7.67575318  | C  |
| 4.36285737  | 5.90016719 | -7.73205792  | C  |
| 8.05445073  | 8.45369602 | -7.91696837  | H  |
| 3.37174395  | 5.48793365 | -8.02739321  | H  |
| 7.03569214  | 7.82389694 | -6.58366597  | H  |
| 4.30800642  | 6.12293162 | -6.63913781  | H  |
| 6.33742834  | 8.02720279 | -8.22988032  | H  |
| 4.50032421  | 6.86375322 | -8.26623596  | H  |

outcell: Unit cell vectors (Ang):

10.512939    0.104565    -0.052632

|           |          |           |
|-----------|----------|-----------|
| 5.346970  | 9.014632 | -0.000314 |
| -0.132513 | 0.064119 | 25.553867 |

**TEMPO on Cu adatom on-top**

|             |             |             |    |
|-------------|-------------|-------------|----|
| 5.18007130  | 2.96700283  | 2.05986370  | Cu |
| 0.00523746  | -0.13395199 | 0.14675721  | Cu |
| 2.60714394  | -0.07767947 | 0.18714134  | Cu |
| 5.20768910  | -0.01548117 | 0.25067215  | Cu |
| 7.81531720  | 0.03078211  | 0.19341779  | Cu |
| 1.34897674  | 2.16647860  | 0.11457359  | Cu |
| 3.93413853  | 2.20946581  | 0.09875658  | Cu |
| 6.57329947  | 2.27083713  | 0.15093087  | Cu |
| 9.16295358  | 2.32602248  | 0.16441039  | Cu |
| 2.70614846  | 4.45573045  | 0.15497423  | Cu |
| 5.30685450  | 4.51678735  | 0.12303982  | Cu |
| 7.90445511  | 4.56977952  | 0.19851321  | Cu |
| 10.51419542 | 4.62385400  | 0.17051804  | Cu |
| 4.04654254  | 6.75737092  | 0.07059796  | Cu |
| 6.65127073  | 6.81166945  | 0.13353477  | Cu |
| 9.25255820  | 6.86959005  | 0.19031871  | Cu |
| 11.86167387 | 6.92189814  | 0.15087692  | Cu |
| 1.25661900  | 0.65257262  | -1.98084817 | Cu |
| 3.85744372  | 0.70813153  | -1.96905642 | Cu |
| 6.45488081  | 0.76186556  | -1.95223499 | Cu |
| 9.06011377  | 0.81505611  | -1.94539841 | Cu |
| 2.60349010  | 2.95471443  | -2.02691414 | Cu |
| 5.20884415  | 3.00154992  | -2.03706172 | Cu |
| 7.80595790  | 3.06031447  | -1.98381636 | Cu |
| 10.41557452 | 3.11719262  | -1.95853929 | Cu |
| 3.95130418  | 5.23633768  | -2.03296116 | Cu |
| 6.55086020  | 5.29410661  | -1.99663416 | Cu |
| 9.15363043  | 5.35787225  | -1.93638497 | Cu |
| 11.77451557 | 5.40784150  | -1.95190595 | Cu |
| 5.30088387  | 7.53704761  | -2.04211959 | Cu |
| 7.90235655  | 7.59655961  | -1.98719025 | Cu |
| 10.50073185 | 7.65716960  | -1.95769776 | Cu |
| 13.10731988 | 7.70193155  | -2.00148181 | Cu |
| -0.05093957 | 1.34947466  | -4.15034207 | Cu |
| 2.54718049  | 1.40329281  | -4.13710118 | Cu |
| 5.15317563  | 1.45537747  | -4.11955278 | Cu |
| 7.76078768  | 1.50835115  | -4.10019355 | Cu |
| 1.29519235  | 3.65112690  | -4.17685591 | Cu |
| 3.89832853  | 3.70383794  | -4.16430340 | Cu |
| 6.50619557  | 3.75934088  | -4.13988289 | Cu |
| 9.11355634  | 3.81265510  | -4.08121757 | Cu |
| 2.64160490  | 5.94503118  | -4.19776647 | Cu |
| 5.24872038  | 6.00132533  | -4.17275513 | Cu |
| 7.85849551  | 6.05217155  | -4.09720975 | Cu |
| 10.45522078 | 6.10914385  | -4.07588016 | Cu |
| 3.99246134  | 8.23771440  | -4.21770993 | Cu |
| 6.59619093  | 8.29406535  | -4.14627918 | Cu |
| 9.20157606  | 8.34382595  | -4.12722372 | Cu |
| 11.80136563 | 8.40057897  | -4.13062647 | Cu |
| 6.13988993  | 0.60454452  | 5.58531706  | H  |

|            |             |            |   |
|------------|-------------|------------|---|
| 5.15221986 | 1.38418233  | 7.62065767 | H |
| 5.12132459 | 0.45418684  | 5.16047799 | C |
| 6.45437177 | 4.79596027  | 5.89419229 | H |
| 4.76800155 | -0.56081099 | 5.44686528 | H |
| 5.20038372 | 0.49333411  | 4.05240220 | H |
| 5.34981214 | 3.90052813  | 7.80192950 | H |
| 4.10716542 | 1.50504347  | 7.24619034 | C |
| 5.47970739 | 5.17172430  | 5.50991770 | C |
| 4.13472225 | 1.53667430  | 5.68591732 | C |
| 4.68737814 | 2.87142317  | 5.23123785 | N |
| 3.55126611 | 0.59384207  | 7.56517109 | H |
| 4.75283980 | 2.98484723  | 3.89187595 | O |
| 4.30098754 | 4.00314232  | 7.43268417 | C |
| 5.56160025 | 5.27400136  | 4.40702665 | H |
| 3.53925952 | 2.68570085  | 8.99933397 | H |
| 3.50161556 | 2.76884361  | 7.88778445 | C |
| 5.28916638 | 6.17647343  | 5.94784258 | H |
| 4.33303754 | 4.19212164  | 5.88650167 | C |
| 3.89461166 | 4.93410938  | 7.89111678 | H |
| 2.71844322 | 1.28906840  | 5.08043683 | C |
| 2.40735490 | 0.23323668  | 5.24280433 | H |
| 2.73506733 | 1.48073711  | 3.98464477 | H |
| 2.42154025 | 2.87388532  | 7.62837478 | H |
| 2.97739367 | 4.74202981  | 5.33984072 | C |
| 1.94147253 | 1.94172161  | 5.53351284 | H |
| 2.95110702 | 4.64289475  | 4.23231326 | H |
| 2.86562545 | 5.81960752  | 5.59468943 | H |
| 2.09445946 | 4.21086122  | 5.75693029 | H |

outcell: Unit cell vectors (Ang):

|           |           |           |
|-----------|-----------|-----------|
| 10.412794 | 0.218517  | 0.072872  |
| 5.393522  | 9.189657  | -0.097999 |
| 0.205970  | -0.438325 | 29.897925 |

**TEMPO on Cu step on-top**

|             |            |             |    |
|-------------|------------|-------------|----|
| 7.97750477  | 0.10483175 | -0.16560228 | Cu |
| 6.64403666  | 2.34624193 | 0.03300069  | Cu |
| 9.26946325  | 2.35529651 | -0.20472309 | Cu |
| 5.36374478  | 4.61628897 | -0.14965713 | Cu |
| 7.95759435  | 4.61821013 | -0.12370358 | Cu |
| 10.51622539 | 4.60246989 | -0.26157514 | Cu |
| 4.07716365  | 6.82137385 | -0.12581913 | Cu |
| 6.65450488  | 6.84045475 | -0.19400191 | Cu |
| 9.23648933  | 6.83658197 | -0.25796567 | Cu |
| 11.82120384 | 6.80355832 | -0.32696222 | Cu |
| 1.44475348  | 0.82074914 | -1.83409389 | Cu |
| 4.02546718  | 0.81911707 | -1.89604449 | Cu |
| 6.57702431  | 0.83477443 | -2.14462624 | Cu |
| 9.19931185  | 0.82605165 | -2.27202597 | Cu |
| 2.74387825  | 3.06256712 | -1.90358350 | Cu |
| 5.28521748  | 3.02874787 | -2.11477282 | Cu |
| 7.87367562  | 3.05385128 | -2.23756324 | Cu |
| 10.51219618 | 3.03996826 | -2.30213110 | Cu |
| 4.00611303  | 5.27978420 | -2.20568935 | Cu |
| 6.60009386  | 5.29997956 | -2.29467616 | Cu |



|             |             |             |    |
|-------------|-------------|-------------|----|
| 9.17838563  | 5.29752890  | -2.36170204 | Cu |
| 11.77184343 | 5.27717507  | -2.39783665 | Cu |
| 5.31475467  | 7.54967674  | -2.26587328 | Cu |
| 7.89017683  | 7.57267134  | -2.31102604 | Cu |
| 10.46402819 | 7.54946943  | -2.38903917 | Cu |
| 13.04093525 | 7.52922448  | -2.46814562 | Cu |
| 0.13918467  | 1.54411389  | -4.20083029 | Cu |
| 2.70230284  | 1.54498404  | -4.04905063 | Cu |
| 5.26181982  | 1.54443567  | -4.26653608 | Cu |
| 7.84590928  | 1.55076420  | -4.41069938 | Cu |
| 1.42954852  | 3.76828715  | -4.26068212 | Cu |
| 3.97923244  | 3.76721983  | -4.29212755 | Cu |
| 6.55687297  | 3.77603450  | -4.39523330 | Cu |
| 9.14388020  | 3.77567674  | -4.47126916 | Cu |
| 2.69938248  | 6.01363172  | -4.38792758 | Cu |
| 5.26801595  | 6.01441241  | -4.44065820 | Cu |
| 7.85015444  | 6.01544491  | -4.49683442 | Cu |
| 10.42803518 | 6.01106518  | -4.56556365 | Cu |
| 3.98099706  | 8.24694059  | -4.42834502 | Cu |
| 6.55994925  | 8.25644646  | -4.43442344 | Cu |
| 9.13360357  | 8.25827281  | -4.49377927 | Cu |
| 11.71341141 | 8.25121461  | -4.58794136 | Cu |
| 7.17111647  | 1.04667011  | 5.78520579  | H  |
| 6.27048418  | -0.43415949 | 5.35379294  | H  |
| 4.81624134  | 1.25399085  | 6.56634197  | H  |
| 4.18327809  | 0.95863387  | 4.92952099  | H  |
| 4.28373992  | 3.45522629  | 5.43059085  | H  |
| 6.02007063  | 3.30242127  | 5.82201141  | H  |
| 6.11214244  | 0.18122229  | 1.63836016  | H  |
| 6.16272896  | -1.15195640 | 2.83724150  | H  |
| 4.81983585  | 0.04512146  | 2.88354717  | H  |
| 8.92026585  | 1.01400105  | 4.17965488  | H  |
| 8.42298681  | -0.66203143 | 3.71933097  | H  |
| 8.62964270  | 0.60401405  | 2.44917986  | H  |
| 3.74576243  | 2.10018129  | 2.96534769  | H  |
| 3.62542250  | 3.89301499  | 2.87618091  | H  |
| 4.63767393  | 3.00215425  | 1.68788205  | H  |
| 6.43115405  | 4.85941628  | 2.52277041  | H  |
| 5.33171751  | 5.37473780  | 3.85983572  | H  |
| 6.99830627  | 4.78307048  | 4.23082555  | H  |
| 6.67748113  | 2.26745548  | 3.23554492  | N  |
| 6.78456952  | 0.81238806  | 3.64159744  | C  |
| 6.35427295  | 0.65490129  | 5.13283186  | C  |
| 5.04846949  | 1.39188589  | 5.48444662  | C  |
| 5.20993388  | 2.89137140  | 5.17298739  | C  |
| 5.56337495  | 3.19280460  | 3.68328019  | C  |
| 5.91040294  | -0.07544407 | 2.70641073  | C  |
| 8.28066622  | 0.41773306  | 3.49017076  | C  |
| 4.31858632  | 3.02999899  | 2.76063808  | C  |
| 6.11570619  | 4.64046247  | 3.56737005  | C  |
| 7.24036118  | 2.57606647  | 2.05742518  | O  |

outcell: Unit cell vectors (Ang):

|           |           |           |
|-----------|-----------|-----------|
| 10.301973 | 0.001464  | -0.241385 |
| 5.151897  | 8.920851  | -0.177821 |
| -0.628144 | -0.171407 | 29.282047 |

**TEMPO w/o O on Cu step on-top**

|             |             |             |    |
|-------------|-------------|-------------|----|
| 7.96056890  | 0.10348941  | -0.13353415 | Cu |
| 6.66805314  | 2.35705105  | 0.21652544  | Cu |
| 9.25581939  | 2.33651156  | -0.21356850 | Cu |
| 5.37869127  | 4.59212333  | -0.06227328 | Cu |
| 7.95737887  | 4.60222328  | -0.14311467 | Cu |
| 10.53563686 | 4.57405515  | -0.26444250 | Cu |
| 4.08118504  | 6.82127708  | -0.11234499 | Cu |
| 6.65405570  | 6.82523734  | -0.18041153 | Cu |
| 9.23975225  | 6.77007780  | -0.26621852 | Cu |
| 11.82522167 | 6.79939934  | -0.28669071 | Cu |
| 1.43028663  | 0.80403449  | -1.97107250 | Cu |
| 3.99178159  | 0.80713314  | -2.18643630 | Cu |
| 6.56059151  | 0.82146768  | -2.14441549 | Cu |
| 9.18185718  | 0.81022839  | -2.26284778 | Cu |
| 2.71921280  | 3.04195462  | -2.02775559 | Cu |
| 5.27595198  | 3.01950720  | -2.09588014 | Cu |
| 7.83401608  | 3.02458503  | -2.19804766 | Cu |
| 10.49756820 | 3.03034897  | -2.31045211 | Cu |
| 3.99962255  | 5.26321149  | -2.16553801 | Cu |
| 6.57647979  | 5.28174202  | -2.26933549 | Cu |
| 9.16784241  | 5.27873503  | -2.36420780 | Cu |
| 11.76437419 | 5.27881591  | -2.39183980 | Cu |
| 5.30685513  | 7.54172856  | -2.24467849 | Cu |
| 7.88395785  | 7.55093792  | -2.30842176 | Cu |
| 10.45815905 | 7.53820234  | -2.38830351 | Cu |
| 13.03869057 | 7.53716261  | -2.39489136 | Cu |
| 0.10239167  | 1.52770024  | -4.27340466 | Cu |
| 2.65950125  | 1.54376662  | -4.24135363 | Cu |
| 5.25573269  | 1.53813557  | -4.33908518 | Cu |
| 7.82895847  | 1.53718124  | -4.40545323 | Cu |
| 1.39361968  | 3.76447314  | -4.35178538 | Cu |
| 3.96326723  | 3.76383867  | -4.28719881 | Cu |
| 6.54274985  | 3.76630076  | -4.37890125 | Cu |
| 9.12021924  | 3.76420467  | -4.44555100 | Cu |
| 2.69106118  | 6.00513781  | -4.39407728 | Cu |
| 5.25031480  | 6.00591004  | -4.42214120 | Cu |
| 7.83211957  | 6.00623765  | -4.48842337 | Cu |
| 10.41093208 | 6.00493275  | -4.56908541 | Cu |
| 3.96894967  | 8.23795753  | -4.41395154 | Cu |
| 6.54264310  | 8.24503064  | -4.41960497 | Cu |
| 9.12258152  | 8.24599305  | -4.52740615 | Cu |
| 11.71219729 | 8.24900866  | -4.54408901 | Cu |
| 5.32001841  | -0.28424095 | 3.25025727  | H  |
| 3.63140349  | 0.16482243  | 3.62948410  | H  |
| 5.21758002  | 0.53260297  | 5.59596423  | H  |
| 4.46882356  | 2.06702785  | 5.09445560  | H  |
| 6.97244211  | 2.36454195  | 5.37843723  | H  |
| 7.26603840  | 0.98741163  | 4.27646959  | H  |
| 3.49432584  | 3.24891234  | 1.46022100  | H  |
| 2.46970224  | 1.94977067  | 2.16700296  | H  |
| 3.36042239  | 3.07359776  | 3.24800088  | H  |
| 5.25811285  | -0.10381867 | 0.87897230  | H  |
| 3.45463020  | 0.06369768  | 1.05613585  | H  |
| 4.37997443  | 1.23126874  | 0.05995679  | H  |

|            |            |            |   |
|------------|------------|------------|---|
| 5.02881019 | 4.12117304 | 4.13856052 | H |
| 6.69495503 | 4.71762896 | 4.39570906 | H |
| 5.93184655 | 4.86506919 | 2.76739308 | H |
| 8.26989427 | 3.77649795 | 2.10394005 | H |
| 8.67860840 | 3.43496041 | 3.82173102 | H |
| 8.61086168 | 2.08335976 | 2.61893471 | H |
| 5.96323545 | 2.21839577 | 2.04491529 | N |
| 4.64450573 | 1.52719608 | 2.23246312 | C |
| 4.65521921 | 0.58258870 | 3.48353216 | C |
| 5.17080530 | 1.26766738 | 4.75789081 | C |
| 6.57223550 | 1.83794105 | 4.48036013 | C |
| 6.62908496 | 2.81751259 | 3.25073731 | C |
| 3.42603034 | 2.51008055 | 2.29372209 | C |
| 4.41898440 | 0.62510593 | 1.00086320 | C |
| 6.02859009 | 4.20651146 | 3.66233968 | C |
| 8.13194500 | 3.03947714 | 2.93505215 | C |

outcell: Unit cell vectors (Ang):

|           |          |           |
|-----------|----------|-----------|
| 10.308650 | 0.009834 | -0.174446 |
| 5.163324  | 8.933236 | -0.092569 |
| -0.420100 | 0.002844 | 30.065148 |

#### Nit8 on flat Au(111) via NO hcp site

|             |             |             |    |
|-------------|-------------|-------------|----|
| -0.08663957 | 0.08643552  | -0.35109099 | Au |
| 2.81532287  | 0.07805639  | -0.41212543 | Au |
| 5.78745533  | 0.07243964  | -0.38952842 | Au |
| 1.36563616  | 2.62152702  | -0.40536979 | Au |
| 4.29194264  | 2.62007376  | -0.39897456 | Au |
| 7.22601470  | 2.61145428  | -0.36391848 | Au |
| 2.83393654  | 5.14057418  | -0.38144238 | Au |
| 5.75427367  | 5.13073001  | -0.37013280 | Au |
| 8.67934858  | 5.13941585  | -0.36841268 | Au |
| 1.39047990  | 0.89818974  | -2.89452645 | Au |
| 4.32125092  | 0.89596716  | -2.87094047 | Au |
| 7.25198359  | 0.89475719  | -2.85348067 | Au |
| 2.85562159  | 3.42701654  | -2.90150561 | Au |
| 5.78189106  | 3.42299343  | -2.88265857 | Au |
| 8.70662017  | 3.42220756  | -2.87053347 | Au |
| 4.31717183  | 5.95176691  | -2.90150360 | Au |
| 7.24192734  | 5.94574423  | -2.89589090 | Au |
| 10.17082644 | 5.94296468  | -2.87403827 | Au |
| -0.03260217 | 1.70098407  | -5.37778162 | Au |
| 2.89414304  | 1.69867394  | -5.35746456 | Au |
| 5.81733540  | 1.69643839  | -5.33799369 | Au |
| 1.42958199  | 4.22894502  | -5.38729017 | Au |
| 4.35384829  | 4.22731196  | -5.36414669 | Au |
| 7.27798849  | 4.22505463  | -5.35044592 | Au |
| 2.89006935  | 6.75395960  | -5.39426214 | Au |
| 5.81445490  | 6.75214499  | -5.37656883 | Au |
| 8.74091987  | 6.75231626  | -5.36137549 | Au |
| -0.00361755 | -0.01574647 | -7.86925618 | Au |
| 2.91891248  | -0.01822773 | -7.84783109 | Au |
| 5.84948341  | -0.01940926 | -7.82791624 | Au |
| 1.45468687  | 2.51354065  | -7.87927621 | Au |

|            |             |             |    |
|------------|-------------|-------------|----|
| 4.38250997 | 2.51259968  | -7.86161322 | Au |
| 7.30787332 | 2.50874911  | -7.84171124 | Au |
| 2.91901666 | 5.03934363  | -7.89484600 | Au |
| 5.84166070 | 5.03790394  | -7.87596353 | Au |
| 8.77022448 | 5.03429841  | -7.85362808 | Au |
| 4.31261350 | 0.70649338  | 2.08994203  | O  |
| 6.10355806 | -0.62896997 | 4.81197856  | H  |
| 3.10375404 | -1.72433486 | 3.79474170  | H  |
| 6.76634277 | 0.08959476  | 3.29860860  | H  |
| 6.41963055 | 0.32421294  | 4.33060640  | C  |
| 7.26227894 | 0.75212887  | 4.91503833  | H  |
| 3.66207361 | -0.51006723 | 5.83865915  | H  |
| 2.35408746 | -0.92821110 | 3.58720528  | C  |
| 4.05324170 | 0.36557605  | 7.98929701  | H  |
| 5.49933414 | 0.94124661  | 8.80419486  | H  |
| 4.93826986 | 0.87003485  | 7.95324458  | N  |
| 1.40914985 | -1.18149997 | 4.11833245  | H  |
| 2.14939011 | -0.92816914 | 2.49306539  | H  |
| 3.30130573 | 0.50093535  | 5.53686556  | C  |
| 5.36924065 | 1.57272938  | 6.84267712  | C  |
| 5.25254848 | 1.34850316  | 4.24975281  | C  |
| 2.86702962 | 0.45808872  | 4.04321793  | C  |
| 4.17865294 | 0.75898207  | 3.36941069  | N  |
| 6.42447984 | 2.22652986  | 6.85606209  | O  |
| 4.45742442 | 1.53777491  | 5.59376186  | C  |
| 2.44887353 | 0.77157178  | 6.19974149  | H  |
| 5.75000262 | 2.68673898  | 3.64883742  | C  |
| 6.29424843 | 2.51048829  | 2.69419168  | H  |
| 6.42541314 | 3.18188447  | 4.38065793  | H  |
| 1.84729573 | 1.56748214  | 3.65965795  | C  |
| 4.01052925 | 2.56107347  | 5.56556919  | H  |
| 0.84681474 | 1.35218316  | 4.09628339  | H  |
| 1.74301717 | 1.60981516  | 2.55134425  | H  |
| 4.89919778 | 3.36830717  | 3.42166456  | H  |
| 2.17121881 | 2.57307176  | 4.00911643  | H  |

outcell: Unit cell vectors (Ang):

|          |           |           |
|----------|-----------|-----------|
| 8.776990 | -0.005989 | 0.057851  |
| 4.383106 | 7.580767  | -0.035625 |
| 0.182817 | -0.243560 | 27.714439 |

**Nit8 on flat Au(111) via NO fcc site**

|             |            |             |    |
|-------------|------------|-------------|----|
| -0.09566388 | 0.07892384 | -0.31626519 | Au |
| 2.81774612  | 0.08511260 | -0.30910205 | Au |
| 5.75379750  | 0.04889204 | -0.32936204 | Au |
| 1.35944082  | 2.61233103 | -0.29984502 | Au |
| 4.27624985  | 2.62230576 | -0.34254087 | Au |
| 7.23081256  | 2.62149004 | -0.33024053 | Au |
| 2.82792899  | 5.13194666 | -0.29861701 | Au |
| 5.75213931  | 5.14394675 | -0.28882987 | Au |
| 8.67095381  | 5.13978301 | -0.26139719 | Au |
| 1.38405775  | 0.89685200 | -2.82504484 | Au |
| 4.30985296  | 0.89644954 | -2.80537214 | Au |
| 7.23733405  | 0.89267385 | -2.77983076 | Au |

|             |             |             |    |
|-------------|-------------|-------------|----|
| 2.84279317  | 3.42520367  | -2.83177165 | Au |
| 5.77251387  | 3.42512551  | -2.80837136 | Au |
| 8.70191122  | 3.42563494  | -2.78828050 | Au |
| 4.31065730  | 5.95005193  | -2.82441291 | Au |
| 7.23463675  | 5.95000884  | -2.80924705 | Au |
| 10.16006085 | 5.94204028  | -2.78993341 | Au |
| -0.04889029 | 1.69462948  | -5.31739786 | Au |
| 2.87750100  | 1.69465873  | -5.29143094 | Au |
| 5.80143779  | 1.69564362  | -5.27282599 | Au |
| 1.41407183  | 4.22369182  | -5.32204363 | Au |
| 4.33967076  | 4.22593280  | -5.29256301 | Au |
| 7.26155351  | 4.22491224  | -5.27376370 | Au |
| 2.87700969  | 6.75201991  | -5.32337364 | Au |
| 5.80050746  | 6.75183737  | -5.29482779 | Au |
| 8.72519975  | 6.75372402  | -5.27691897 | Au |
| -0.02285304 | -0.02649565 | -7.81358289 | Au |
| 2.89635222  | -0.02608143 | -7.79045451 | Au |
| 5.82455850  | -0.02659687 | -7.76252260 | Au |
| 1.43658044  | 2.50493540  | -7.82118844 | Au |
| 4.35894945  | 2.50624126  | -7.79488127 | Au |
| 7.28733605  | 2.50491672  | -7.77162872 | Au |
| 2.89844692  | 5.03172718  | -7.82695599 | Au |
| 5.82308902  | 5.03500074  | -7.80583495 | Au |
| 8.74883461  | 5.03207405  | -7.78008634 | Au |
| 5.75319755  | 1.60169117  | 2.07993701  | O  |
| 7.53881082  | 0.20492833  | 4.78681727  | H  |
| 4.57055389  | -0.89345174 | 3.78516132  | H  |
| 8.21767347  | 0.95524326  | 3.29471075  | H  |
| 7.85815597  | 1.16768543  | 4.32724743  | C  |
| 8.69291728  | 1.58668400  | 4.92947855  | H  |
| 5.11767803  | 0.31922515  | 5.82381662  | H  |
| 3.82368020  | -0.09976309 | 3.55914576  | C  |
| 5.50671064  | 1.18317532  | 7.98404322  | H  |
| 6.95599036  | 1.75653696  | 8.79127907  | H  |
| 6.39965151  | 1.67300605  | 7.93800256  | N  |
| 2.86461743  | -0.35942584 | 4.06101349  | H  |
| 3.65042721  | -0.09935055 | 2.45833220  | H  |
| 4.74742714  | 1.32757849  | 5.52556536  | C  |
| 6.80302813  | 2.41269446  | 6.84055924  | C  |
| 6.69465521  | 2.19575708  | 4.24936898  | C  |
| 4.31457000  | 1.28941214  | 4.03056831  | C  |
| 5.62150629  | 1.61995114  | 3.36071855  | N  |
| 7.84225376  | 3.09162671  | 6.86050968  | O  |
| 5.89289331  | 2.37517486  | 5.59071257  | C  |
| 3.89157628  | 1.58654987  | 6.18853243  | H  |
| 7.20502573  | 3.53538445  | 3.66254981  | C  |
| 7.79247002  | 3.36414142  | 2.73290753  | H  |
| 7.84668086  | 4.03626951  | 4.42005059  | H  |
| 3.27594047  | 2.38510399  | 3.65828133  | C  |
| 5.43781276  | 3.39470027  | 5.56231946  | H  |
| 2.28785692  | 2.16267300  | 4.11883544  | H  |
| 3.14424174  | 2.41926432  | 2.55260974  | H  |
| 6.35756107  | 4.20724046  | 3.39866193  | H  |
| 3.59708563  | 3.39649146  | 3.99294482  | H  |

outcell: Unit cell vectors (Ang):

|          |           |           |
|----------|-----------|-----------|
| 8.774221 | 0.000277  | 0.073377  |
| 4.386947 | 7.584975  | -0.019113 |
| 0.234116 | -0.218594 | 27.368179 |

**Nit8 on flat Au(111) via >CO**

|             |             |             |    |
|-------------|-------------|-------------|----|
| -0.12152281 | 0.05302079  | -0.50543753 | Au |
| 2.79267601  | 0.05804274  | -0.47976924 | Au |
| 5.71210892  | 0.04862137  | -0.51546744 | Au |
| 1.33520605  | 2.59014088  | -0.50468789 | Au |
| 4.22954888  | 2.59942714  | -0.59022983 | Au |
| 7.20257653  | 2.59587450  | -0.57271078 | Au |
| 2.78610353  | 5.11919837  | -0.49064767 | Au |
| 5.71222367  | 5.11381732  | -0.52471198 | Au |
| 8.63739600  | 5.11887892  | -0.45560491 | Au |
| 1.36730106  | 0.87535178  | -3.01767517 | Au |
| 4.28429951  | 0.87046257  | -3.02569717 | Au |
| 7.20853112  | 0.86747709  | -2.99527876 | Au |
| 2.81263419  | 3.41041257  | -3.06013237 | Au |
| 5.74451249  | 3.40271343  | -3.04207522 | Au |
| 8.67292172  | 3.40409680  | -3.00557472 | Au |
| 4.27993754  | 5.92743997  | -3.04195031 | Au |
| 7.20617848  | 5.92642755  | -3.02004459 | Au |
| 10.12657724 | 5.91993979  | -3.00635056 | Au |
| -0.05472121 | 1.68533207  | -5.51909957 | Au |
| 2.86516123  | 1.68429196  | -5.50874400 | Au |
| 5.78890290  | 1.68348503  | -5.49929221 | Au |
| 1.40136005  | 4.21545341  | -5.53872725 | Au |
| 4.32435492  | 4.21324436  | -5.52259701 | Au |
| 7.24565583  | 4.21111950  | -5.49687999 | Au |
| 2.86349654  | 6.74019945  | -5.53879428 | Au |
| 5.78447010  | 6.73909117  | -5.50877580 | Au |
| 8.70369914  | 6.73634450  | -5.50044067 | Au |
| -0.02048923 | -0.02316398 | -8.02442508 | Au |
| 2.89732375  | -0.02529707 | -8.01024822 | Au |
| 5.82102650  | -0.02916240 | -7.98870438 | Au |
| 1.43657655  | 2.50602418  | -8.03857573 | Au |
| 4.35487363  | 2.50354197  | -8.02209518 | Au |
| 7.28238233  | 2.50148956  | -7.99583352 | Au |
| 2.89319902  | 5.03099425  | -8.05016830 | Au |
| 5.81637623  | 5.03528972  | -8.02772880 | Au |
| 8.73726487  | 5.02764116  | -8.00884870 | Au |
| 8.61030675  | 3.37475702  | 6.04183616  | H  |
| 8.38567658  | 2.61176869  | 7.65993952  | H  |
| 7.96042098  | 3.35170197  | 6.94524722  | C  |
| 7.99252927  | 4.35996584  | 7.41486190  | H  |
| 7.60508251  | 2.49249998  | 4.03219025  | H  |
| 7.63820798  | 4.91571943  | 3.75668551  | H  |
| 7.10032275  | 0.98413575  | 5.91046793  | H  |
| 6.59293215  | 4.79221135  | 3.39120799  | C  |
| 6.51838946  | 2.32319250  | 4.22723841  | C  |
| 6.48576249  | 3.00723674  | 6.59086158  | C  |
| 6.62646850  | 4.47499236  | 2.32539228  | H  |
| 6.34950463  | 1.76844185  | 5.66542994  | C  |
| 6.07240776  | 1.43369646  | 3.05271995  | C  |

|            |             |            |   |
|------------|-------------|------------|---|
| 5.97615905 | 1.92294635  | 1.90939712 | O |
| 5.81516811 | 0.10666113  | 3.29085824 | N |
| 5.93474535 | 4.09110000  | 5.70132889 | N |
| 5.83037018 | 3.73937432  | 4.23487516 | C |
| 5.90840518 | -0.31523020 | 4.21423935 | H |
| 6.09083622 | 5.78279628  | 3.45982460 | H |
| 6.00643550 | 2.10084895  | 8.53859959 | H |
| 5.73551066 | 5.28865156  | 6.13136813 | O |
| 5.63257103 | 2.91423387  | 7.87699926 | C |
| 5.59410932 | -0.48639279 | 2.48142594 | H |
| 5.68145287 | 3.87710592  | 8.43062769 | H |
| 5.33487642 | 1.32471439  | 5.79431099 | H |
| 4.32500193 | 3.72698930  | 3.84312582 | C |
| 4.56576205 | 2.71028316  | 7.63493552 | H |
| 4.19453363 | 3.56572588  | 2.75023852 | H |
| 3.88328788 | 4.71288950  | 4.11417246 | H |
| 3.76165624 | 2.93636693  | 4.38888504 | H |

outcell: Unit cell vectors (Ang):

|          |           |           |
|----------|-----------|-----------|
| 8.763916 | -0.005131 | 0.060449  |
| 4.377041 | 7.578661  | -0.025998 |
| 0.182292 | -0.225826 | 28.492356 |

**Nit8 on flat Au(111) parallel**

|             |             |             |    |
|-------------|-------------|-------------|----|
| -0.09363375 | 0.07280035  | -0.42694737 | Au |
| 2.82929663  | 0.06400278  | -0.43321538 | Au |
| 5.75672364  | 0.07092932  | -0.35791599 | Au |
| 1.35536263  | 2.60977746  | -0.58027502 | Au |
| 4.29046850  | 2.59700726  | -0.45913067 | Au |
| 7.21675750  | 2.59613195  | -0.38371088 | Au |
| 2.82447988  | 5.12814162  | -0.43725038 | Au |
| 5.74790499  | 5.11337771  | -0.37485440 | Au |
| 8.67226613  | 5.12374320  | -0.36709426 | Au |
| 1.39279191  | 0.87907406  | -2.97776250 | Au |
| 4.32133659  | 0.88109378  | -2.92558579 | Au |
| 7.24551507  | 0.88083544  | -2.86388679 | Au |
| 2.85901508  | 3.41933117  | -2.99553051 | Au |
| 5.78104616  | 3.41048455  | -2.92735713 | Au |
| 8.69519394  | 3.41514294  | -2.92118531 | Au |
| 4.31795498  | 5.93096951  | -2.95334301 | Au |
| 7.23630400  | 5.92166238  | -2.93304085 | Au |
| 10.16675234 | 5.92975196  | -2.88688986 | Au |
| -0.05008596 | 1.68598396  | -5.46896061 | Au |
| 2.88222648  | 1.68782438  | -5.43815907 | Au |
| 5.80768227  | 1.68623618  | -5.38684204 | Au |
| 1.41509436  | 4.21660381  | -5.48169708 | Au |
| 4.34422972  | 4.21345612  | -5.43880677 | Au |
| 7.26620867  | 4.20976201  | -5.40897077 | Au |
| 2.87619180  | 6.73524925  | -5.46729012 | Au |
| 5.80238871  | 6.73376113  | -5.44575055 | Au |
| 8.72982716  | 6.73182112  | -5.40671807 | Au |
| -0.02285861 | -0.02481536 | -7.95588634 | Au |
| 2.90821868  | -0.02489536 | -7.92103044 | Au |
| 5.83513830  | -0.02524991 | -7.88557892 | Au |
| 1.44192048  | 2.50139992  | -7.97054665 | Au |

|            |             |             |    |
|------------|-------------|-------------|----|
| 4.36951394 | 2.50001373  | -7.93566565 | Au |
| 7.29421276 | 2.49814055  | -7.90346030 | Au |
| 2.90484757 | 5.02589562  | -7.97980838 | Au |
| 5.82991441 | 5.02368234  | -7.94127294 | Au |
| 8.75502837 | 5.02333486  | -7.91105250 | Au |
| 2.38393191 | 0.31790563  | 5.01943820  | O  |
| 5.15114633 | 2.19358483  | 6.14066071  | H  |
| 2.10306547 | 3.43668835  | 5.92353229  | H  |
| 4.83613739 | 0.43596956  | 6.37449051  | H  |
| 5.28449165 | 1.18629981  | 5.68578962  | C  |
| 6.37260850 | 0.98665728  | 5.58631472  | H  |
| 4.05780811 | 3.96223114  | 4.51532513  | H  |
| 1.56604344 | 3.17136671  | 4.98564203  | C  |
| 5.89211867 | 4.80096599  | 3.33013877  | H  |
| 7.58707217 | 4.37810152  | 3.24166020  | H  |
| 6.61486370 | 4.08048309  | 3.34250058  | N  |
| 1.14045425 | 4.10595663  | 4.55626904  | H  |
| 0.72780632 | 2.48291764  | 5.22990335  | H  |
| 3.78542039 | 3.33750962  | 3.63302305  | C  |
| 6.36011494 | 2.72699771  | 3.35404628  | C  |
| 4.58800120 | 1.08126199  | 4.29945970  | C  |
| 2.50642553 | 2.51237786  | 3.95099728  | C  |
| 3.10074293 | 1.24783802  | 4.52395990  | N  |
| 7.27832781 | 1.88478822  | 3.33779880  | O  |
| 4.88413508 | 2.28262647  | 3.33674097  | C  |
| 3.62558216 | 4.01707470  | 2.76439651  | H  |
| 4.86006105 | -0.29772537 | 3.65153654  | C  |
| 4.61609374 | -1.11019299 | 4.37237963  | H  |
| 5.93187775 | -0.35400818 | 3.36061274  | H  |
| 1.71649666 | 2.10705418  | 2.67964691  | C  |
| 4.74291490 | 1.91819789  | 2.28610399  | H  |
| 1.25059603 | 3.00175348  | 2.20566923  | H  |
| 0.90539045 | 1.39231990  | 2.93204532  | H  |
| 4.24459573 | -0.43769652 | 2.73370487  | H  |
| 2.38343120 | 1.64057071  | 1.92161597  | H  |

outcell: Unit cell vectors (Ang):

|          |           |           |
|----------|-----------|-----------|
| 8.778588 | -0.003734 | 0.107918  |
| 4.385700 | 7.568039  | -0.036078 |
| 0.348296 | -0.346904 | 25.844611 |

**Nit8 on flat Cu(111) via NO fcc site**

|             |             |             |    |
|-------------|-------------|-------------|----|
| -0.06756843 | -0.03683840 | -0.07454910 | Cu |
| 2.56103933  | -0.01193253 | -0.00932837 | Cu |
| 5.18951857  | 0.01024369  | 0.03769197  | Cu |
| 7.82075463  | 0.03814189  | 0.07329210  | Cu |
| 1.27563821  | 2.22423035  | 0.00732728  | Cu |
| 3.89845286  | 2.24552876  | 0.04302570  | Cu |
| 6.52970518  | 2.26919262  | 0.08511831  | Cu |
| 9.15054073  | 2.29753786  | 0.13561664  | Cu |
| 2.60796915  | 4.47327711  | 0.08968156  | Cu |
| 5.23247150  | 4.49754598  | 0.10893140  | Cu |
| 7.85572247  | 4.52125661  | 0.17577590  | Cu |
| 10.49283612 | 4.54966867  | 0.22412325  | Cu |



|             |            |              |    |
|-------------|------------|--------------|----|
| 3.93319113  | 6.72433664 | 0.10608213   | Cu |
| 6.57171285  | 6.74917202 | 0.14790028   | Cu |
| 9.19698155  | 6.77374985 | 0.22218304   | Cu |
| 11.83015947 | 6.80105100 | 0.26427010   | Cu |
| 1.25196424  | 0.71740323 | -2.15445520  | Cu |
| 3.88305381  | 0.73224556 | -2.10614219  | Cu |
| 6.50956812  | 0.76437217 | -2.06228714  | Cu |
| 9.14040493  | 0.79787608 | -2.02750124  | Cu |
| 2.60314591  | 2.96874840 | -2.11127869  | Cu |
| 5.21343400  | 2.99665006 | -2.08421101  | Cu |
| 7.83437851  | 3.02497082 | -2.02401696  | Cu |
| 10.47884134 | 3.03918344 | -1.95234565  | Cu |
| 3.93506703  | 5.20899111 | -2.06661936  | Cu |
| 6.54221416  | 5.23887365 | -2.02233665  | Cu |
| 9.18292621  | 5.26492012 | -1.92861428  | Cu |
| 11.81421637 | 5.28980223 | -1.88912730  | Cu |
| 5.26249528  | 7.46221324 | -2.02219389  | Cu |
| 7.89056831  | 7.50600139 | -1.93992697  | Cu |
| 10.52171215 | 7.52359538 | -1.89527436  | Cu |
| 13.15126341 | 7.55627466 | -1.85420774  | Cu |
| -0.00416575 | 1.46102966 | -4.32046232  | Cu |
| 2.61718012  | 1.45786500 | -4.26925612  | Cu |
| 5.25119180  | 1.47402953 | -4.20645819  | Cu |
| 7.88661924  | 1.52338859 | -4.18273483  | Cu |
| 1.31500882  | 3.70641414 | -4.22724079  | Cu |
| 3.88587606  | 3.69583292 | -4.26018015  | Cu |
| 6.60740210  | 3.72223248 | -4.18904906  | Cu |
| 9.22847663  | 3.78039149 | -4.08417095  | Cu |
| 2.62564829  | 5.99712949 | -4.14666009  | Cu |
| 5.27264455  | 6.05786246 | -4.20003745  | Cu |
| 7.94586482  | 6.03126362 | -4.04744329  | Cu |
| 10.55426908 | 6.03541831 | -4.04723520  | Cu |
| 3.98465018  | 8.25262441 | -4.14903682  | Cu |
| 6.64047883  | 8.26330061 | -4.10132478  | Cu |
| 9.26583369  | 8.26307521 | -4.06601685  | Cu |
| 11.89132918 | 8.30464010 | -4.02351796  | Cu |
| 4.84484254  | 2.32991217 | -8.22333353  | H  |
| 6.36621840  | 3.56854917 | -9.44316453  | H  |
| 3.07653850  | 2.55048788 | -8.48947971  | H  |
| 3.94506976  | 2.88567884 | -7.87855114  | C  |
| 7.27312303  | 3.05160664 | -7.23740824  | H  |
| 3.74757317  | 2.58318192 | -6.82322606  | H  |
| 4.13526385  | 4.26459062 | -10.19805983 | H  |
| 8.51727052  | 4.11651778 | -8.01576087  | H  |
| 8.27654407  | 5.31960490 | -10.34017776 | O  |
| 6.15409218  | 4.65973519 | -9.33700646  | C  |
| 7.64476194  | 4.09751573 | -7.32558781  | C  |
| 7.03885224  | 5.30354910 | -10.43112651 | C  |
| 5.38336192  | 5.74461495 | -11.68051590 | H  |
| 4.62344145  | 4.86198245 | -9.39522527  | C  |
| 6.96479307  | 6.19546611 | -12.29304826 | H  |
| 6.38669024  | 5.83846395 | -11.52957562 | N  |
| 4.11762286  | 4.42867643 | -7.98589507  | C  |
| 6.56451941  | 5.06340023 | -7.86529396  | C  |
| 7.99860192  | 4.41741666 | -6.31426425  | H  |
| 5.23274816  | 4.97641535 | -7.14982138  | N  |

|            |            |             |   |
|------------|------------|-------------|---|
| 5.24985334 | 4.62693826 | -5.78867343 | O |
| 1.98345228 | 4.86930973 | -8.33557376 | H |
| 4.37106902 | 5.93495862 | -9.55933101 | H |
| 2.79220556 | 5.14374798 | -7.62055436 | C |
| 2.44448117 | 4.85602721 | -6.59890075 | H |
| 8.04602583 | 6.66973552 | -8.23089412 | H |
| 7.05968042 | 6.53250446 | -7.73806270 | C |
| 2.92493239 | 6.24874306 | -7.63550322 | H |
| 6.33008443 | 7.24620734 | -8.18254107 | H |
| 7.16680106 | 6.79577273 | -6.65842030 | H |

outcell: Unit cell vectors (Ang):

|           |          |           |
|-----------|----------|-----------|
| 10.517794 | 0.100682 | 0.169421  |
| 5.346392  | 9.022323 | 0.211083  |
| 0.380558  | 0.325490 | 26.239970 |

### Nit8 on flat Cu(111) via NO hcp site

|             |            |             |    |
|-------------|------------|-------------|----|
| 0.03739750  | 0.02110649 | -0.04893687 | Cu |
| 2.67809625  | 0.04959618 | -0.05965941 | Cu |
| 5.30185182  | 0.08059350 | -0.05857408 | Cu |
| 7.93340210  | 0.10590715 | -0.07713637 | Cu |
| 1.37787448  | 2.28926462 | -0.01818446 | Cu |
| 4.00990806  | 2.31535736 | -0.03709766 | Cu |
| 6.64097512  | 2.33804501 | -0.05947452 | Cu |
| 9.26959884  | 2.36942534 | -0.07099453 | Cu |
| 2.73102292  | 4.54405483 | -0.01128742 | Cu |
| 5.35022961  | 4.56742890 | -0.02913447 | Cu |
| 7.98106781  | 4.59345013 | -0.04377980 | Cu |
| 10.60543128 | 4.62630439 | -0.05252730 | Cu |
| 4.06403842  | 6.79154659 | -0.02394018 | Cu |
| 6.69011662  | 6.82011292 | -0.06161858 | Cu |
| 9.31977313  | 6.84534892 | -0.04386141 | Cu |
| 11.95203115 | 6.87709267 | -0.06715086 | Cu |
| 1.30488445  | 0.74059305 | -2.16554181 | Cu |
| 3.93094886  | 0.78020686 | -2.18284770 | Cu |
| 6.56523084  | 0.78508574 | -2.20012103 | Cu |
| 9.19226917  | 0.82401880 | -2.21568470 | Cu |
| 2.64297115  | 2.99823211 | -2.15247719 | Cu |
| 5.28943549  | 3.01741079 | -2.19327976 | Cu |
| 7.89682179  | 3.04713399 | -2.20392200 | Cu |
| 10.53786036 | 3.07698799 | -2.19560782 | Cu |
| 4.02369691  | 5.25140720 | -2.18067078 | Cu |
| 6.62468055  | 5.26572858 | -2.22016268 | Cu |
| 9.23174949  | 5.31148557 | -2.20134367 | Cu |
| 11.88214817 | 5.33024642 | -2.19616449 | Cu |
| 5.33092094  | 7.49591846 | -2.19620223 | Cu |
| 7.95807539  | 7.52676034 | -2.20295392 | Cu |
| 10.58453132 | 7.56786048 | -2.19585796 | Cu |
| 13.21665883 | 7.58856422 | -2.21486823 | Cu |
| -0.01725401 | 1.45893751 | -4.30913994 | Cu |
| 2.61535399  | 1.49610853 | -4.32221201 | Cu |
| 5.24243755  | 1.50653577 | -4.33907751 | Cu |
| 7.88510156  | 1.52487174 | -4.35696250 | Cu |
| 1.32673212  | 3.71503554 | -4.28466501 | Cu |

|             |            |              |    |
|-------------|------------|--------------|----|
| 3.94438722  | 3.73074760 | -4.27564638  | Cu |
| 6.60638633  | 3.70554658 | -4.37285161  | Cu |
| 9.23551325  | 3.78060597 | -4.28643612  | Cu |
| 2.66106924  | 5.96945282 | -4.27644064  | Cu |
| 5.28076065  | 6.02363930 | -4.37911831  | Cu |
| 7.96294879  | 6.09016237 | -4.36255088  | Cu |
| 10.56933377 | 6.06378312 | -4.30242340  | Cu |
| 3.99714743  | 8.23327311 | -4.31192036  | Cu |
| 6.63075669  | 8.30217656 | -4.31261837  | Cu |
| 9.27343522  | 8.31115381 | -4.32966053  | Cu |
| 11.89506809 | 8.30902659 | -4.35961240  | Cu |
| 6.28296498  | 3.07592820 | -8.39185760  | H  |
| 7.80353459  | 4.29925152 | -9.61610172  | H  |
| 4.51258255  | 3.31091206 | -8.63218601  | H  |
| 5.39361697  | 3.64267818 | -8.03771582  | C  |
| 8.72514878  | 3.79862464 | -7.44081751  | H  |
| 5.21247147  | 3.35300945 | -6.97685577  | H  |
| 5.57691061  | 5.00599361 | -10.37104133 | H  |
| 9.97625359  | 4.87136570 | -8.19962469  | H  |
| 9.73732131  | 6.02038010 | -10.51723863 | O  |
| 7.60217016  | 5.39349654 | -9.52086419  | C  |
| 9.09941430  | 4.84467835 | -7.51523959  | C  |
| 8.50013576  | 6.01269593 | -10.61883491 | C  |
| 6.86619955  | 6.44038523 | -11.90303473 | H  |
| 6.07218927  | 5.60681337 | -9.57521871  | C  |
| 8.46489669  | 6.85359084 | -12.49900745 | H  |
| 7.86692751  | 6.53411895 | -11.73402281 | N  |
| 5.57183591  | 5.18409954 | -8.15967837  | C  |
| 8.02044039  | 5.81020801 | -8.05642568  | C  |
| 9.44745876  | 5.15242625 | -6.49823829  | H  |
| 6.69317394  | 5.73189654 | -7.33077437  | N  |
| 6.71329087  | 5.38110577 | -5.97684000  | O  |
| 3.43272280  | 5.62168720 | -8.48421452  | H  |
| 5.82443051  | 6.67977878 | -9.74572608  | H  |
| 4.25120157  | 5.89969367 | -7.78241382  | C  |
| 3.92259819  | 5.61313100 | -6.75471347  | H  |
| 9.49053688  | 7.42271326 | -8.45170714  | H  |
| 8.50835753  | 7.28343235 | -7.95158685  | C  |
| 4.38209818  | 7.00480225 | -7.79745159  | H  |
| 7.76969270  | 7.98437150 | -8.40136903  | H  |
| 8.61702223  | 7.56103223 | -6.87574561  | H  |

outcell: Unit cell vectors (Ang):

|           |          |           |
|-----------|----------|-----------|
| 10.520354 | 0.114696 | -0.057562 |
| 5.357351  | 9.027859 | -0.008621 |
| -0.159495 | 0.031768 | 25.926922 |

**Nit8 on flat Cu(111) via >CO**

|            |            |             |    |
|------------|------------|-------------|----|
| 0.05827722 | 0.03461538 | -0.05990058 | Cu |
| 2.69808060 | 0.08393029 | -0.03658407 | Cu |
| 5.32760569 | 0.12860308 | -0.04597111 | Cu |
| 7.95543925 | 0.16978584 | -0.07608669 | Cu |
| 1.41787974 | 2.30075748 | -0.03991519 | Cu |
| 4.05011461 | 2.34862982 | -0.03673485 | Cu |

|             |            |              |    |
|-------------|------------|--------------|----|
| 6.68156851  | 2.39212181 | -0.05885631  | Cu |
| 9.31046097  | 2.43174742 | -0.08585320  | Cu |
| 2.77436381  | 4.56594739 | -0.05584779  | Cu |
| 5.40253029  | 4.61123213 | -0.05272527  | Cu |
| 8.03673410  | 4.65544598 | -0.06067496  | Cu |
| 10.67018217 | 4.70209311 | -0.07788267  | Cu |
| 4.12466610  | 6.82890336 | -0.08508762  | Cu |
| 6.75875051  | 6.87547518 | -0.06975122  | Cu |
| 9.39093099  | 6.92107269 | -0.06665052  | Cu |
| 12.02169037 | 6.96423644 | -0.09560266  | Cu |
| 1.37489022  | 0.80036328 | -2.18386642  | Cu |
| 4.00511585  | 0.84634830 | -2.18321538  | Cu |
| 6.63615342  | 0.88545859 | -2.20338632  | Cu |
| 9.27148020  | 0.92508545 | -2.22334175  | Cu |
| 2.72605565  | 3.05757818 | -2.18228903  | Cu |
| 5.35892563  | 3.10750190 | -2.19136159  | Cu |
| 7.99016619  | 3.15096736 | -2.20419541  | Cu |
| 10.63124666 | 3.18972995 | -2.21531216  | Cu |
| 4.08666139  | 5.32360672 | -2.20964752  | Cu |
| 6.71668194  | 5.36791475 | -2.20577888  | Cu |
| 9.35175378  | 5.41125552 | -2.19872595  | Cu |
| 11.98310009 | 5.45680396 | -2.22992494  | Cu |
| 5.44100928  | 7.57706038 | -2.22859966  | Cu |
| 8.06982135  | 7.64122746 | -2.20150635  | Cu |
| 10.70232109 | 7.68100078 | -2.22837526  | Cu |
| 13.33180088 | 7.72152304 | -2.25567137  | Cu |
| 0.00421284  | 1.47851204 | -4.34326013  | Cu |
| 2.63318213  | 1.52821496 | -4.33436602  | Cu |
| 5.26525291  | 1.56995852 | -4.33341401  | Cu |
| 7.90603275  | 1.60332258 | -4.35346178  | Cu |
| 1.35971966  | 3.74339006 | -4.34716785  | Cu |
| 3.97859909  | 3.78465605 | -4.31717085  | Cu |
| 6.63370729  | 3.80931696 | -4.31825978  | Cu |
| 9.26237468  | 3.86844528 | -4.32396867  | Cu |
| 2.71627191  | 6.00065314 | -4.37013908  | Cu |
| 5.34002815  | 6.05100669 | -4.35536217  | Cu |
| 8.03793266  | 6.13404277 | -4.29616206  | Cu |
| 10.62368396 | 6.13913436 | -4.35793840  | Cu |
| 4.06716014  | 8.26727315 | -4.38155080  | Cu |
| 6.69777214  | 8.32287936 | -4.34641712  | Cu |
| 9.33461714  | 8.37399377 | -4.36149559  | Cu |
| 11.96474382 | 8.40299836 | -4.39640845  | Cu |
| 7.58417620  | 7.22772701 | -12.35483870 | H  |
| 8.40736951  | 7.35148458 | -10.75601151 | H  |
| 8.23763492  | 6.68792855 | -11.63299134 | C  |
| 9.22331432  | 6.50634817 | -12.11645796 | H  |
| 7.38721158  | 6.59457734 | -8.68811077  | H  |
| 5.77121801  | 6.34273970 | -10.52623292 | H  |
| 9.77270835  | 6.16606285 | -8.45888591  | H  |
| 7.61642944  | 5.32105897 | -11.22185000 | C  |
| 6.39555687  | 5.45802534 | -10.26925127 | C  |
| 7.00598590  | 5.55522414 | -8.84407650  | C  |
| 6.60873902  | 4.97263892 | -13.15216518 | H  |
| 4.28575391  | 5.45735735 | -8.73204302  | H  |
| 6.07597953  | 5.34620343 | -7.63721373  | C  |
| 9.46457548  | 5.17105402 | -8.06553967  | C  |

|             |            |              |   |
|-------------|------------|--------------|---|
| 4.72464600  | 5.32684142 | -7.82066104  | N |
| 7.33567865  | 4.46371976 | -12.47996777 | C |
| 9.20334762  | 5.28617530 | -6.98949255  | H |
| 6.57798962  | 5.24740454 | -6.48466941  | O |
| 8.58767228  | 4.59319089 | -10.33210975 | N |
| 4.13249357  | 5.27016463 | -6.97760553  | H |
| 8.28248664  | 4.30105640 | -13.04000544 | H |
| 8.25996477  | 4.60240880 | -8.85633752  | C |
| 5.75888793  | 4.54726096 | -10.36199330 | H |
| 9.71008375  | 4.14663013 | -10.77571670 | O |
| 10.33540696 | 4.48505831 | -8.15378514  | H |
| 6.92567747  | 3.46552267 | -12.20633421 | H |
| 7.95965624  | 3.14073638 | -8.41796128  | C |
| 7.81525347  | 3.06964860 | -7.31674301  | H |
| 7.05370475  | 2.73357066 | -8.92246842  | H |
| 8.82360372  | 2.50069040 | -8.70373580  | H |

outcell: Unit cell vectors (Ang):

|           |           |           |
|-----------|-----------|-----------|
| 10.527072 | 0.178950  | -0.031739 |
| 5.418008  | 9.056976  | -0.042882 |
| -0.086545 | -0.071476 | 26.547710 |

#### Nit8 on Cu adatom on-top via NO

|             |            |             |    |
|-------------|------------|-------------|----|
| 5.35346861  | 3.05563748 | 2.08362507  | Cu |
| 0.05965271  | 0.02060673 | 0.13529507  | Cu |
| 2.68410170  | 0.05785291 | 0.13215215  | Cu |
| 5.30998593  | 0.09203731 | 0.14253471  | Cu |
| 7.93817126  | 0.11905379 | 0.11148044  | Cu |
| 1.40171454  | 2.27988098 | 0.11427678  | Cu |
| 4.01842602  | 2.30763632 | 0.12630258  | Cu |
| 6.66435674  | 2.33701311 | 0.08595671  | Cu |
| 9.28049512  | 2.37841989 | 0.09458399  | Cu |
| 2.74690098  | 4.53348936 | 0.12278253  | Cu |
| 5.36989845  | 4.57673074 | 0.10954373  | Cu |
| 7.99746668  | 4.60300108 | 0.10896476  | Cu |
| 10.62221832 | 4.63947502 | 0.09706921  | Cu |
| 4.09072746  | 6.79010495 | 0.08969636  | Cu |
| 6.71453411  | 6.82637650 | 0.09263191  | Cu |
| 9.33942196  | 6.86404549 | 0.09195084  | Cu |
| 11.96772266 | 6.89521383 | 0.08471400  | Cu |
| 1.37420053  | 0.74887766 | -2.01860331 | Cu |
| 4.00073579  | 0.78480668 | -2.02391469 | Cu |
| 6.62448950  | 0.81554948 | -2.03771432 | Cu |
| 9.25301418  | 0.85104069 | -2.03582937 | Cu |
| 2.71827524  | 3.00523607 | -2.03782694 | Cu |
| 5.33874795  | 3.04008801 | -2.06708981 | Cu |
| 7.96657738  | 3.07502661 | -2.05080151 | Cu |
| 10.59457222 | 3.11117793 | -2.04842745 | Cu |
| 4.06172209  | 5.26032428 | -2.05163878 | Cu |
| 6.68388837  | 5.29390579 | -2.05001210 | Cu |
| 9.31148016  | 5.33194842 | -2.04771464 | Cu |
| 11.94113676 | 5.36378751 | -2.05278435 | Cu |
| 5.40648590  | 7.51790361 | -2.05912092 | Cu |
| 8.03105275  | 7.55361488 | -2.06001825 | Cu |

|             |             |             |    |
|-------------|-------------|-------------|----|
| 10.65672136 | 7.58982498  | -2.06161841 | Cu |
| 13.28277657 | 7.61909677  | -2.07353813 | Cu |
| 0.02792904  | 1.45277003  | -4.17055009 | Cu |
| 2.65132612  | 1.48509640  | -4.17976616 | Cu |
| 5.27787616  | 1.51789587  | -4.18528088 | Cu |
| 7.90738243  | 1.55328458  | -4.19206088 | Cu |
| 1.36946088  | 3.70989910  | -4.18960750 | Cu |
| 3.99435278  | 3.74334941  | -4.19517322 | Cu |
| 6.62500830  | 3.77906852  | -4.20184911 | Cu |
| 9.25069512  | 3.81351675  | -4.19609586 | Cu |
| 2.71456819  | 5.96649600  | -4.20098408 | Cu |
| 5.34083521  | 6.00243225  | -4.20457035 | Cu |
| 7.96836589  | 6.03689186  | -4.20009588 | Cu |
| 10.59139070 | 6.06787245  | -4.20618318 | Cu |
| 4.05728640  | 8.22082966  | -4.21338809 | Cu |
| 6.68504474  | 8.25714534  | -4.20934632 | Cu |
| 9.30909081  | 8.28791944  | -4.21759921 | Cu |
| 11.93663020 | 8.32242420  | -4.22525423 | Cu |
| 6.06201522  | 2.98062705  | 3.90231335  | O  |
| 6.85181900  | 5.43717288  | 6.88438373  | H  |
| 7.08165822  | 3.65049965  | 6.96189499  | H  |
| 6.75742896  | 4.49029718  | 6.30721366  | C  |
| 7.44963497  | 4.53449648  | 5.43836937  | H  |
| 5.35706979  | 2.13972420  | 7.61676151  | H  |
| 4.54986733  | 4.44256339  | 7.87764309  | H  |
| 6.64188201  | 0.98132577  | 5.93753788  | H  |
| 5.29891062  | 4.30897727  | 5.79437300  | C  |
| 4.30465751  | 3.91816407  | 6.92671687  | C  |
| 4.42462489  | 2.37519647  | 7.04799886  | C  |
| 4.87629641  | 6.46847043  | 5.62234924  | H  |
| 2.49920009  | 3.36263827  | 8.66573490  | H  |
| 3.33025929  | 1.59953273  | 7.82034082  | C  |
| 5.65719554  | 0.68839185  | 5.50840444  | C  |
| 2.46532054  | 2.34631604  | 8.60005013  | N  |
| 4.86048084  | 5.55561291  | 4.98581976  | C  |
| 5.25155868  | -0.16540369 | 6.09460233  | H  |
| 3.26164142  | 0.36117296  | 7.77463476  | O  |
| 5.19901432  | 3.09942996  | 4.91714578  | N  |
| 1.76463303  | 1.84125523  | 9.14617299  | H  |
| 5.54857423  | 5.71833979  | 4.12613425  | H  |
| 4.64431468  | 1.85856765  | 5.57493939  | C  |
| 3.27239872  | 4.21346913  | 6.62810573  | H  |
| 5.82780166  | 0.37093410  | 4.45655100  | H  |
| 3.83302166  | 5.42289523  | 4.57987533  | H  |
| 3.32581866  | 1.47699272  | 4.84307231  | C  |
| 2.90878798  | 0.53187056  | 5.25179976  | H  |
| 2.55844626  | 2.27698544  | 4.94586417  | H  |
| 3.52687466  | 1.33973127  | 3.75502042  | H  |

outcell: Unit cell vectors (Ang):

|           |           |           |
|-----------|-----------|-----------|
| 10.502702 | 0.137504  | -0.013707 |
| 5.374083  | 9.026978  | -0.053907 |
| -0.044335 | -0.139743 | 26.971244 |

**Nit8 on Cu adatom on-top via >CO**

|             |            |             |    |
|-------------|------------|-------------|----|
| 5.62629493  | 3.32582693 | 2.04318777  | Cu |
| 0.00273460  | 0.06070168 | 0.04266289  | Cu |
| 2.62603627  | 0.09321784 | 0.08050635  | Cu |
| 5.24322605  | 0.11585127 | 0.11385830  | Cu |
| 7.86251066  | 0.13951244 | 0.11843997  | Cu |
| 1.34254444  | 2.31633636 | 0.07471079  | Cu |
| 3.97105386  | 2.35504959 | 0.18696038  | Cu |
| 6.60057858  | 2.34609334 | 0.04111070  | Cu |
| 9.19158879  | 2.40046441 | 0.16072973  | Cu |
| 2.66890794  | 4.57717286 | 0.09221719  | Cu |
| 5.27801180  | 4.62964935 | 0.03176450  | Cu |
| 7.85443610  | 4.59917103 | 0.24520364  | Cu |
| 10.51097582 | 4.65602865 | 0.19891043  | Cu |
| 3.99944782  | 6.83147743 | 0.07539958  | Cu |
| 6.62193633  | 6.85671428 | 0.11775896  | Cu |
| 9.22999164  | 6.87840730 | 0.16229561  | Cu |
| 11.85557653 | 6.91492686 | 0.18992953  | Cu |
| 1.33619451  | 0.79422851 | -2.08240136 | Cu |
| 3.95789394  | 0.82873846 | -2.03295752 | Cu |
| 6.57629470  | 0.84559966 | -2.06721462 | Cu |
| 9.19089434  | 0.88026642 | -2.01209165 | Cu |
| 2.67893050  | 3.04442236 | -2.03510404 | Cu |
| 5.28161763  | 3.07167296 | -2.08786378 | Cu |
| 7.91234173  | 3.10657955 | -2.04139739 | Cu |
| 10.52727359 | 3.13245140 | -1.94624965 | Cu |
| 3.99901312  | 5.30489886 | -2.09251205 | Cu |
| 6.62966990  | 5.32956892 | -2.05597315 | Cu |
| 9.23110760  | 5.35174306 | -1.94991211 | Cu |
| 11.85600082 | 5.38549110 | -1.93149584 | Cu |
| 5.33631553  | 7.55493274 | -2.06194063 | Cu |
| 7.95454961  | 7.58815411 | -2.01719325 | Cu |
| 10.56899879 | 7.61485232 | -1.98569941 | Cu |
| 13.18660980 | 7.64090012 | -1.96988411 | Cu |
| 0.02589508  | 1.50138084 | -4.25351260 | Cu |
| 2.64108097  | 1.52336402 | -4.21556251 | Cu |
| 5.25656043  | 1.54150525 | -4.20497485 | Cu |
| 7.88268567  | 1.57414575 | -4.21275179 | Cu |
| 1.35532081  | 3.74705254 | -4.21368280 | Cu |
| 3.96875238  | 3.77223862 | -4.21511689 | Cu |
| 6.59696862  | 3.80562370 | -4.19478343 | Cu |
| 9.21675797  | 3.84029856 | -4.13754415 | Cu |
| 2.68394410  | 6.00135336 | -4.23329732 | Cu |
| 5.30761038  | 6.03759971 | -4.21402751 | Cu |
| 7.93132029  | 6.06805676 | -4.16217376 | Cu |
| 10.54203942 | 6.08254011 | -4.11633303 | Cu |
| 4.02062921  | 8.25846891 | -4.22688384 | Cu |
| 6.64209513  | 8.29459896 | -4.18316449 | Cu |
| 9.25703155  | 8.31484204 | -4.14760001 | Cu |
| 11.87735189 | 8.33618991 | -4.14117214 | Cu |
| 5.29990295  | 2.86131927 | 4.00411244  | O  |
| 6.37081094  | 5.08294775 | 4.55534100  | H  |
| 5.96898647  | 4.59130281 | 5.35944730  | N  |
| 3.58158634  | 2.83946254 | 6.12705562  | H  |
| 5.35402730  | 3.39149293 | 5.14730526  | C  |

|            |             |             |   |
|------------|-------------|-------------|---|
| 4.01938025 | 0.55178407  | 4.48640073  | H |
| 5.95506872 | 5.05682065  | 6.26745689  | H |
| 2.86225494 | 0.56303261  | 5.87473894  | H |
| 4.66944622 | 2.69136303  | 6.33492474  | C |
| 2.34654692 | 2.37761312  | 8.13908927  | H |
| 3.90495715 | 0.32299026  | 5.56799231  | C |
| 4.47452122 | 4.18372543  | 7.98474386  | H |
| 4.97491222 | 3.21269380  | 7.76866302  | C |
| 2.95798895 | 2.18818370  | 9.05000202  | C |
| 4.92260830 | 1.13961027  | 6.39759913  | C |
| 2.75571560 | 3.00409764  | 9.77939403  | H |
| 4.07008944 | -0.76221112 | 5.74732285  | H |
| 6.56252218 | 0.79699829  | 4.95983508  | H |
| 2.62459798 | 1.22216267  | 9.49063097  | H |
| 4.47477982 | 2.08582865  | 8.72057607  | C |
| 6.07189862 | 3.35033575  | 7.91003151  | H |
| 6.37698794 | 0.71917334  | 6.05237996  | C |
| 4.69628957 | 0.87119330  | 7.86480736  | N |
| 7.12578011 | 1.34581964  | 6.58756424  | H |
| 4.50095804 | -0.31967393 | 8.31493981  | O |
| 6.52440779 | -0.33544051 | 6.37521142  | H |
| 5.29999810 | 1.93624379  | 10.02122450 | C |
| 5.10167005 | 2.77787012  | 10.72117688 | H |
| 6.39084792 | 1.90471097  | 9.80458416  | H |
| 5.02492597 | 0.97999405  | 10.52040780 | H |

outcell: Unit cell vectors (Ang):

|           |           |           |
|-----------|-----------|-----------|
| 10.472812 | 0.114139  | 0.132861  |
| 5.330370  | 9.019855  | 0.057923  |
| 0.324987  | -0.029168 | 27.517733 |

**Nit8 on Cu adatom on-top via -NH<sub>2</sub>**

|             |            |             |    |
|-------------|------------|-------------|----|
| 5.24353818  | 2.96246619 | 1.90791694  | Cu |
| 0.03783340  | 0.03821133 | 0.04880465  | Cu |
| 2.65753906  | 0.07188527 | 0.02821818  | Cu |
| 5.27534247  | 0.11917334 | 0.02793198  | Cu |
| 7.90542857  | 0.13964050 | -0.01466672 | Cu |
| 1.36731623  | 2.29134641 | -0.00381466 | Cu |
| 3.95947341  | 2.31594030 | -0.07808111 | Cu |
| 6.63159044  | 2.35331013 | -0.05616004 | Cu |
| 9.24286421  | 2.39255014 | -0.05499842 | Cu |
| 2.72071691  | 4.53796811 | -0.00211559 | Cu |
| 5.34478025  | 4.57618527 | -0.02629993 | Cu |
| 7.96725128  | 4.60512348 | -0.03483755 | Cu |
| 10.58846438 | 4.63888603 | -0.06036491 | Cu |
| 4.06515816  | 6.79190799 | -0.04340343 | Cu |
| 6.68505279  | 6.82739922 | -0.05329022 | Cu |
| 9.30926923  | 6.86156946 | -0.06687768 | Cu |
| 11.93068178 | 6.89857064 | -0.09243938 | Cu |
| 1.29298938  | 0.75290966 | -2.12848294 | Cu |
| 3.91358499  | 0.78368961 | -2.17432688 | Cu |
| 6.53449050  | 0.82174110 | -2.18814648 | Cu |
| 9.15849149  | 0.85970470 | -2.19067343 | Cu |
| 2.62923021  | 3.01065301 | -2.19183715 | Cu |



|             |             |             |    |
|-------------|-------------|-------------|----|
| 5.25524323  | 3.04365322  | -2.22786899 | Cu |
| 7.87630247  | 3.07840555  | -2.22104151 | Cu |
| 10.49867953 | 3.11371110  | -2.22891743 | Cu |
| 3.97707710  | 5.25851557  | -2.18130333 | Cu |
| 6.59623758  | 5.29468780  | -2.18982946 | Cu |
| 9.21794492  | 5.32954155  | -2.19766894 | Cu |
| 11.84251751 | 5.36405193  | -2.22312259 | Cu |
| 5.31818806  | 7.51387401  | -2.20015676 | Cu |
| 7.93949982  | 7.54737193  | -2.21431850 | Cu |
| 10.56020771 | 7.58559364  | -2.22709407 | Cu |
| 13.18231804 | 7.61708130  | -2.25876649 | Cu |
| -0.06007858 | 1.46623924  | -4.28270985 | Cu |
| 2.55688313  | 1.49666893  | -4.31178013 | Cu |
| 5.18152047  | 1.53149251  | -4.33271618 | Cu |
| 7.80667986  | 1.56689561  | -4.34738764 | Cu |
| 1.27674813  | 3.72336695  | -4.31701220 | Cu |
| 3.89977854  | 3.75883258  | -4.33968972 | Cu |
| 6.52698867  | 3.79535655  | -4.35835392 | Cu |
| 9.14931999  | 3.82748733  | -4.36828276 | Cu |
| 2.62196834  | 5.97623551  | -4.33544169 | Cu |
| 5.24436491  | 6.01205561  | -4.35710390 | Cu |
| 7.86775054  | 6.04371209  | -4.36369678 | Cu |
| 10.48662113 | 6.07677551  | -4.38269704 | Cu |
| 3.96316794  | 8.22226646  | -4.37006541 | Cu |
| 6.58630618  | 8.25721318  | -4.37973108 | Cu |
| 9.20714396  | 8.28615630  | -4.40671433 | Cu |
| 11.83025550 | 8.32197624  | -4.42636606 | Cu |
| 5.11626223  | 1.25828374  | 5.23070357  | O  |
| 6.00745075  | 3.29557913  | 4.34036353  | H  |
| 5.03367380  | 3.21417367  | 4.00033199  | N  |
| 2.67501201  | 1.02112747  | 4.30542375  | H  |
| 4.40173322  | 2.11586445  | 4.71624473  | C  |
| 3.40313282  | 0.25648534  | 6.99825960  | H  |
| 4.53876326  | 4.11674032  | 4.07551970  | H  |
| 1.82445705  | -0.15145164 | 6.22174583  | H  |
| 2.86617077  | 2.02766958  | 4.75104910  | C  |
| 0.39012424  | 0.77330510  | 3.76423865  | H  |
| 2.35032059  | 0.58796645  | 6.86559193  | C  |
| 2.01133409  | 2.93392458  | 2.90089137  | H  |
| 1.97800843  | 3.06535806  | 4.00759398  | C  |
| -0.22966947 | 1.68958007  | 3.89252917  | C  |
| 2.31137496  | 1.99528380  | 6.22802830  | C  |
| -0.57746527 | 2.00089604  | 2.87995433  | H  |
| 1.83189452  | 0.61679818  | 7.84887466  | H  |
| 3.97828447  | 2.72850822  | 7.49135170  | H  |
| -1.11371400 | 1.42220991  | 4.51524589  | H  |
| 0.54949244  | 2.83862608  | 4.59513496  | C  |
| 2.29213159  | 4.11356048  | 4.22743958  | H  |
| 2.95479053  | 3.03763413  | 7.18509988  | C  |
| 0.88219781  | 2.40355549  | 5.99706933  | N  |
| 3.00247299  | 4.05349774  | 6.73089320  | H  |
| -0.00342175 | 2.30752964  | 6.92562336  | O  |
| 2.31813745  | 3.11309595  | 8.09483067  | H  |
| -0.33288196 | 4.10971136  | 4.66184066  | C  |
| -0.66077462 | 4.41550397  | 3.64255654  | H  |
| 0.20189074  | 4.96332273  | 5.13597286  | H  |

-1.22996018      3.89346100      5.28701265      H

outcell: Unit cell vectors (Ang):

10.486986      0.137366      -0.071873  
5.366889      9.012429      -0.123849  
-0.197653      -0.274203      27.638569

**Nit8 on Cu step on-top via NO**

|             |            |             |    |
|-------------|------------|-------------|----|
| 8.02331230  | 0.10225090 | -0.20760084 | Cu |
| 6.66214159  | 2.35181506 | -0.00431723 | Cu |
| 9.28335957  | 2.35897297 | -0.23709650 | Cu |
| 5.38399831  | 4.61627698 | -0.15251800 | Cu |
| 7.96555042  | 4.61703133 | -0.12757386 | Cu |
| 10.52815622 | 4.60381700 | -0.28184435 | Cu |
| 4.08569863  | 6.81632120 | -0.12942552 | Cu |
| 6.66227351  | 6.84568322 | -0.20274843 | Cu |
| 9.23761318  | 6.82489998 | -0.29187986 | Cu |
| 11.83357405 | 6.81356161 | -0.33943167 | Cu |
| 1.44566554  | 0.81344497 | -1.85372421 | Cu |
| 4.03030771  | 0.81114581 | -1.92497860 | Cu |
| 6.58018842  | 0.82636022 | -2.16664053 | Cu |
| 9.20555629  | 0.82557310 | -2.31681065 | Cu |
| 2.74439061  | 3.05531393 | -1.91561306 | Cu |
| 5.28685966  | 3.02593579 | -2.12617634 | Cu |
| 7.87652759  | 3.04927691 | -2.26135723 | Cu |
| 10.51910597 | 3.03961136 | -2.33638717 | Cu |
| 4.00971179  | 5.27589021 | -2.20541501 | Cu |
| 6.60426777  | 5.29846277 | -2.30328444 | Cu |
| 9.18019726  | 5.28799691 | -2.38344689 | Cu |
| 11.77789253 | 5.27804062 | -2.41061256 | Cu |
| 5.31895699  | 7.54784593 | -2.27300945 | Cu |
| 7.89441952  | 7.57616063 | -2.32937077 | Cu |
| 10.46893926 | 7.54856225 | -2.40464906 | Cu |
| 13.04748774 | 7.52837037 | -2.47227044 | Cu |
| 0.14413850  | 1.53614457 | -4.24899135 | Cu |
| 2.70245046  | 1.53708462 | -4.06692487 | Cu |
| 5.26586310  | 1.53701766 | -4.28843419 | Cu |
| 7.84936084  | 1.54512294 | -4.44723637 | Cu |
| 1.43512660  | 3.76306630 | -4.29578929 | Cu |
| 3.98369103  | 3.76132238 | -4.29216187 | Cu |
| 6.56221503  | 3.77037141 | -4.40905175 | Cu |
| 9.14747062  | 3.77188913 | -4.49885496 | Cu |
| 2.71039082  | 6.00864279 | -4.40365626 | Cu |
| 5.27454334  | 6.00913834 | -4.44510805 | Cu |
| 7.85604720  | 6.01379227 | -4.50945324 | Cu |
| 10.43646188 | 6.01018606 | -4.58114905 | Cu |
| 3.99005482  | 8.24316187 | -4.44424878 | Cu |
| 6.56743772  | 8.25419465 | -4.44959075 | Cu |
| 9.14104733  | 8.25791646 | -4.51331160 | Cu |
| 11.72353534 | 8.25206514 | -4.59437264 | Cu |
| 3.81679896  | 3.70565378 | 6.25042742  | O  |
| 3.81752329  | 1.99026441 | 8.08709533  | H  |
| 4.19441021  | 1.65303504 | 7.19924350  | N  |
| 3.77006546  | 1.86262972 | 4.18083074  | H  |

|            |             |            |   |
|------------|-------------|------------|---|
| 4.21308543 | 2.53553217  | 6.13393208 | C |
| 4.20312243 | 4.63727117  | 3.78292624 | H |
| 4.48651921 | 0.67904503  | 7.12873505 | H |
| 4.14576805 | 3.45183498  | 2.41640541 | H |
| 4.70768046 | 1.98294466  | 4.77535776 | C |
| 4.18574727 | 0.47707648  | 2.28462527 | H |
| 4.81936590 | 3.98790306  | 3.12358360 | C |
| 4.80617433 | -0.24428281 | 4.90114094 | H |
| 5.47467574 | 0.63269445  | 4.74879958 | C |
| 5.20103507 | 0.02401923  | 2.24726866 | C |
| 5.62447942 | 2.99102316  | 3.98863719 | C |
| 5.09718476 | -1.08325648 | 2.33300711 | H |
| 5.51039576 | 4.62166947  | 2.51917755 | H |
| 6.12808534 | 4.53264213  | 5.48655678 | H |
| 5.62612599 | 0.23611472  | 1.23650215 | H |
| 6.14955564 | 0.58408929  | 3.34602890 | C |
| 6.26003089 | 0.60794935  | 5.53905697 | H |
| 6.64348738 | 3.75218371  | 4.88659484 | C |
| 6.38570502 | 2.04087229  | 3.10917998 | N |
| 7.17064020 | 3.06397882  | 5.58503926 | H |
| 7.08106618 | 2.48107208  | 2.07745647 | O |
| 7.40783129 | 4.23199549  | 4.23622624 | H |
| 7.50528455 | -0.16358197 | 3.33032142 | C |
| 7.35970944 | -1.25974671 | 3.45694388 | H |
| 8.17911113 | 0.20733639  | 4.13522842 | H |
| 8.01370519 | -0.00222014 | 2.34834817 | H |

outcell: Unit cell vectors (Ang):

|           |           |           |
|-----------|-----------|-----------|
| 10.302534 | 0.005819  | -0.226445 |
| 5.156228  | 8.928201  | -0.154080 |
| -0.585593 | -0.118382 | 29.295077 |

### Nit8 on Cu step on-top via >CO

|             |            |             |    |
|-------------|------------|-------------|----|
| 8.03691594  | 0.14244341 | -0.14617052 | Cu |
| 6.69984981  | 2.39179942 | -0.07272644 | Cu |
| 9.29004299  | 2.40517617 | -0.15003442 | Cu |
| 5.43373085  | 4.67408558 | -0.20215468 | Cu |
| 8.00490151  | 4.64738006 | -0.07691516 | Cu |
| 10.56677174 | 4.63742848 | -0.19789095 | Cu |
| 4.12031883  | 6.85942367 | -0.18240169 | Cu |
| 6.71287574  | 6.87864991 | -0.20196546 | Cu |
| 9.28749579  | 6.86443091 | -0.23483448 | Cu |
| 11.86770867 | 6.86514210 | -0.24586656 | Cu |
| 1.52997449  | 0.88807686 | -1.96436287 | Cu |
| 4.10919554  | 0.88607060 | -2.00391180 | Cu |
| 6.66764411  | 0.87949417 | -2.20408458 | Cu |
| 9.28518261  | 0.88857848 | -2.23495938 | Cu |
| 2.82191455  | 3.12661404 | -2.01673041 | Cu |
| 5.36326969  | 3.09254307 | -2.20483768 | Cu |
| 7.95450727  | 3.11309461 | -2.23340620 | Cu |
| 10.59466035 | 3.10423432 | -2.24836906 | Cu |
| 4.08823496  | 5.34241901 | -2.26935772 | Cu |
| 6.69095241  | 5.36234685 | -2.31732360 | Cu |
| 9.26867842  | 5.35874049 | -2.33429253 | Cu |

|             |             |             |    |
|-------------|-------------|-------------|----|
| 11.85456743 | 5.34543374  | -2.31605763 | Cu |
| 5.40226515  | 7.61113106  | -2.28995591 | Cu |
| 7.98263519  | 7.63184977  | -2.29594940 | Cu |
| 10.55610257 | 7.60995663  | -2.33592389 | Cu |
| 13.13217598 | 7.58883553  | -2.37760482 | Cu |
| 0.24015387  | 1.59358435  | -4.31770164 | Cu |
| 2.80696545  | 1.59794853  | -4.16264504 | Cu |
| 5.37321834  | 1.58884249  | -4.34754666 | Cu |
| 7.96043391  | 1.59494690  | -4.41499217 | Cu |
| 1.52671493  | 3.82526364  | -4.36611557 | Cu |
| 4.08489060  | 3.82346685  | -4.36743295 | Cu |
| 6.66666835  | 3.82634852  | -4.42740772 | Cu |
| 9.25147924  | 3.82544356  | -4.42348845 | Cu |
| 2.80899249  | 6.06522196  | -4.47078029 | Cu |
| 5.38034844  | 6.06849728  | -4.47836961 | Cu |
| 7.96366991  | 6.07261186  | -4.48852148 | Cu |
| 10.54412439 | 6.06602391  | -4.52603875 | Cu |
| 4.09766269  | 8.29933762  | -4.49495120 | Cu |
| 6.67478462  | 8.31080764  | -4.44321688 | Cu |
| 9.25294340  | 8.31024085  | -4.47046289 | Cu |
| 11.82980589 | 8.29980733  | -4.54206554 | Cu |
| 5.82630484  | 1.85972784  | 1.77074238  | O  |
| 7.88410061  | 3.13030047  | 2.49663874  | H  |
| 7.30901316  | 2.76817093  | 3.27512029  | N  |
| 4.35710748  | 2.33127359  | 3.99834675  | H  |
| 6.16716899  | 2.09482426  | 2.96365725  | C  |
| 3.62692709  | 0.45739740  | 1.95688467  | H  |
| 7.54736629  | 3.02066409  | 4.23497476  | H  |
| 2.60350536  | 0.79932281  | 3.40663179  | H  |
| 5.22374455  | 1.63198534  | 4.08588759  | C  |
| 3.03389730  | 2.18688834  | 5.99433290  | H  |
| 3.39258102  | 0.13115051  | 2.99314810  | C  |
| 5.78733077  | 2.69907589  | 5.96442562  | H  |
| 5.73450537  | 1.66577721  | 5.55319872  | C  |
| 3.45898733  | 1.55897032  | 6.80874192  | C  |
| 4.66776939  | 0.17521991  | 3.86852551  | C  |
| 3.68432208  | 2.21993789  | 7.67512385  | H  |
| 2.98696296  | -0.90457864 | 2.97400044  | H  |
| 5.94295654  | -0.68138222 | 2.27170815  | H  |
| 2.68137044  | 0.82295715  | 7.11244693  | H  |
| 4.72382867  | 0.78317213  | 6.34244419  | C  |
| 6.75184522  | 1.21638408  | 5.62665691  | H  |
| 5.72555311  | -0.83897884 | 3.35224749  | C  |
| 4.31327343  | -0.20277932 | 5.28416571  | N  |
| 6.68366168  | -0.76919429 | 3.91598082  | H  |
| 3.55749207  | -1.21064766 | 5.55260932  | O  |
| 5.32411796  | -1.86843193 | 3.48166606  | H  |
| 5.34616557  | 0.00878935  | 7.52738946  | C  |
| 5.58906909  | 0.69352597  | 8.36958732  | H  |
| 6.27561760  | -0.51881702 | 7.21780004  | H  |
| 4.62044144  | -0.75722991 | 7.88120725  | H  |

outcell: Unit cell vectors (Ang):

|           |           |           |
|-----------|-----------|-----------|
| 10.309495 | 0.001160  | -0.062917 |
| 5.155640  | 8.932998  | -0.127625 |
| -0.179397 | -0.307433 | 29.670217 |

**Nit8 on Cu step on-top via -NH<sub>2</sub>**

|             |            |             |    |
|-------------|------------|-------------|----|
| 8.00372352  | 0.16783726 | -0.23122191 | Cu |
| 6.74963231  | 2.38485458 | -0.31307465 | Cu |
| 9.30264891  | 2.40545761 | -0.28498649 | Cu |
| 5.42510279  | 4.61455443 | -0.24810689 | Cu |
| 8.03066932  | 4.64145865 | -0.29426824 | Cu |
| 10.58514749 | 4.64206417 | -0.32492179 | Cu |
| 4.13934783  | 6.90513615 | -0.29493989 | Cu |
| 6.72309115  | 6.91075993 | -0.30046220 | Cu |
| 9.30141550  | 6.86450486 | -0.34613664 | Cu |
| 11.88231800 | 6.86742202 | -0.36076430 | Cu |
| 1.55151358  | 0.89773901 | -2.00693410 | Cu |
| 4.13640550  | 0.90014967 | -2.05777242 | Cu |
| 6.68371291  | 0.87239425 | -2.33926473 | Cu |
| 9.30606792  | 0.88726036 | -2.34396989 | Cu |
| 2.84476117  | 3.13523509 | -2.08651501 | Cu |
| 5.38015915  | 3.10921687 | -2.32605323 | Cu |
| 7.99996942  | 3.12420781 | -2.43102533 | Cu |
| 10.61791573 | 3.10655265 | -2.37796370 | Cu |
| 4.11130704  | 5.34510907 | -2.34359100 | Cu |
| 6.69234978  | 5.36222921 | -2.39696808 | Cu |
| 9.29059673  | 5.36254425 | -2.48156052 | Cu |
| 11.87744750 | 5.34532595 | -2.44395644 | Cu |
| 5.42270348  | 7.60584666 | -2.40241457 | Cu |
| 7.99919000  | 7.62822533 | -2.41067089 | Cu |
| 10.56974042 | 7.59808459 | -2.46220289 | Cu |
| 13.14336202 | 7.58008128 | -2.52906132 | Cu |
| 0.26046944  | 1.59432163 | -4.39927531 | Cu |
| 2.81929931  | 1.59636429 | -4.23083529 | Cu |
| 5.37841157  | 1.58811454 | -4.45494963 | Cu |
| 7.97479889  | 1.58883258 | -4.53603222 | Cu |
| 1.54664114  | 3.82090365 | -4.45414376 | Cu |
| 4.09224529  | 3.81773746 | -4.47719197 | Cu |
| 6.67669988  | 3.82427645 | -4.54543274 | Cu |
| 9.27089376  | 3.82231848 | -4.58947134 | Cu |
| 2.82386220  | 6.05571976 | -4.56098762 | Cu |
| 5.39156553  | 6.05557929 | -4.58578209 | Cu |
| 7.96937369  | 6.05976275 | -4.60526115 | Cu |
| 10.55514705 | 6.05486366 | -4.66900846 | Cu |
| 4.10726747  | 8.28263803 | -4.60211727 | Cu |
| 6.68750635  | 8.29709156 | -4.56762133 | Cu |
| 9.26017871  | 8.29383615 | -4.59754391 | Cu |
| 11.83809046 | 8.27701016 | -4.70572602 | Cu |
| 6.34203888  | 6.42293179 | 2.69033679  | O  |
| 4.30900620  | 5.10145218 | 2.12326476  | H  |
| 5.15971201  | 4.52237558 | 2.15449948  | N  |
| 8.26647205  | 4.54274535 | 2.45754424  | H  |
| 6.28187655  | 5.18520698 | 2.71153009  | C  |
| 8.60267109  | 6.78953145 | 4.21943011  | H  |
| 5.00297010  | 3.53758686 | 2.39877868  | H  |
| 9.89830898  | 5.56419167 | 3.92197242  | H  |
| 7.45549875  | 4.31783538 | 3.20170001  | C  |
| 9.99543639  | 2.84229901 | 2.68671515  | H  |
| 9.05320396  | 5.84400630 | 4.59132798  | C  |
| 7.30351918  | 2.32507534 | 2.23690658  | H  |

|             |            |            |   |
|-------------|------------|------------|---|
| 7.27142219  | 2.77865560 | 3.25920363 | C |
| 9.75325982  | 2.00458197 | 3.38165034 | C |
| 7.98176899  | 4.72939246 | 4.62587155 | C |
| 9.69203393  | 1.07010562 | 2.77766625 | H |
| 9.46265444  | 5.99334257 | 5.61452845 | H |
| 6.42406586  | 6.08777152 | 5.41973376 | H |
| 10.58991774 | 1.90422016 | 4.10917509 | H |
| 8.42886123  | 2.26190820 | 4.15986254 | C |
| 6.29761708  | 2.50602310 | 3.73127433 | H |
| 6.85335548  | 5.08524787 | 5.63551513 | C |
| 8.62657112  | 3.44144008 | 5.07332593 | N |
| 6.02841047  | 4.33772718 | 5.61548011 | H |
| 9.38463007  | 3.38740788 | 6.11011065 | O |
| 7.28146021  | 5.08868607 | 6.66218257 | H |
| 8.05342207  | 1.02827555 | 5.01329730 | C |
| 7.97432940  | 0.11871469 | 4.37715028 | H |
| 7.08155908  | 1.18297827 | 5.53410260 | H |
| 8.83475171  | 0.86309503 | 5.78754256 | H |

outcell: Unit cell vectors (Ang):

|           |           |           |
|-----------|-----------|-----------|
| 10.306013 | -0.004926 | -0.110387 |
| 5.148963  | 8.911446  | -0.166882 |
| -0.312508 | -0.351835 | 30.317295 |

**Nit8 w/o O on Cu step on-top via NH<sub>2</sub>**

|             |            |             |    |
|-------------|------------|-------------|----|
| 8.07317541  | 0.18187951 | -0.13497305 | Cu |
| 6.77590653  | 2.44074826 | 0.07411792  | Cu |
| 9.36283799  | 2.42512981 | -0.20852262 | Cu |
| 5.48096723  | 4.70795705 | -0.25583951 | Cu |
| 8.05579358  | 4.70248357 | -0.17766321 | Cu |
| 10.60356870 | 4.67578338 | -0.29351124 | Cu |
| 4.15080412  | 6.89344502 | -0.25058324 | Cu |
| 6.74715456  | 6.94909866 | -0.28235257 | Cu |
| 9.31517351  | 6.90124626 | -0.31823138 | Cu |
| 11.88339368 | 6.91295977 | -0.33015154 | Cu |
| 1.53796420  | 0.90901072 | -1.97260275 | Cu |
| 4.09660807  | 0.90869496 | -2.19026777 | Cu |
| 6.66272981  | 0.90458326 | -2.17169676 | Cu |
| 9.28036520  | 0.91247818 | -2.26107862 | Cu |
| 2.82755405  | 3.14021203 | -2.06822378 | Cu |
| 5.37800473  | 3.10345885 | -2.20068923 | Cu |
| 7.95072155  | 3.12832308 | -2.23468107 | Cu |
| 10.60390718 | 3.13060658 | -2.33234204 | Cu |
| 4.09885077  | 5.35483890 | -2.30723523 | Cu |
| 6.69698351  | 5.38723021 | -2.36844962 | Cu |
| 9.27316004  | 5.38234294 | -2.42700425 | Cu |
| 11.85502218 | 5.37932994 | -2.41591391 | Cu |
| 5.41203321  | 7.63646057 | -2.36270836 | Cu |
| 7.99532080  | 7.65882046 | -2.38390904 | Cu |
| 10.55553038 | 7.64177601 | -2.43431087 | Cu |
| 13.13250996 | 7.62604232 | -2.45447370 | Cu |
| 0.22067690  | 1.60254932 | -4.35039220 | Cu |
| 2.77162454  | 1.61668862 | -4.28089274 | Cu |
| 5.35815834  | 1.60812294 | -4.38115009 | Cu |

|             |            |             |    |
|-------------|------------|-------------|----|
| 7.93474838  | 1.61682027 | -4.41438914 | Cu |
| 1.50984575  | 3.83921907 | -4.45616378 | Cu |
| 4.06885723  | 3.83476661 | -4.38913205 | Cu |
| 6.65106405  | 3.84301741 | -4.44768049 | Cu |
| 9.22744055  | 3.84557743 | -4.49826590 | Cu |
| 2.80374684  | 6.08266488 | -4.52555122 | Cu |
| 5.36751498  | 6.08308917 | -4.53348353 | Cu |
| 7.94700698  | 6.09057428 | -4.55820662 | Cu |
| 10.51984580 | 6.08788319 | -4.62675211 | Cu |
| 4.08770625  | 8.31302751 | -4.56647608 | Cu |
| 6.65979532  | 8.32722773 | -4.52512566 | Cu |
| 9.23232491  | 8.32639008 | -4.61621445 | Cu |
| 11.81650186 | 8.32945849 | -4.61451737 | Cu |
| 6.45036238  | 0.67087477 | 5.76776977  | H  |
| 8.22740383  | 2.61793538 | 4.32498429  | H  |
| 6.56754874  | 1.18719469 | 3.28716980  | H  |
| 5.57594496  | 1.11772219 | 6.29057976  | C  |
| 4.91828798  | 0.29149623 | 6.64198161  | H  |
| 5.95316685  | 1.67410355 | 7.17725242  | H  |
| 8.23941050  | 3.45560623 | 2.71699328  | H  |
| 7.78511505  | 3.45067592 | 3.73431302  | C  |
| 5.75291693  | 1.92725750 | 3.07715290  | C  |
| 4.31631681  | 0.45702087 | 3.97521597  | H  |
| 5.58611716  | 1.83248903 | 1.55128648  | C  |
| 8.03733938  | 4.40165886 | 4.25423880  | H  |
| 4.51627330  | 1.14496993 | 1.15628642  | N  |
| 4.51171306  | 1.55277747 | 3.95287656  | C  |
| 4.79949170  | 2.10556516 | 5.37579418  | C  |
| 6.24654454  | 3.31067823 | 3.65293464  | C  |
| 4.34699579  | 0.97417926 | 0.14109245  | H  |
| 3.83189912  | 0.70605899 | 1.79275883  | H  |
| 5.70011459  | 3.26246065 | 5.05677383  | N  |
| 6.05430914  | 4.11938694 | 5.94814393  | O  |
| 2.89312529  | 1.78742980 | 6.43459568  | H  |
| 3.54348412  | 2.63105674 | 6.11161442  | C  |
| 3.59807065  | 2.04946235 | 3.54981132  | H  |
| 5.62625678  | 4.54835478 | 2.95891719  | C  |
| 3.85839370  | 3.20845686 | 7.00861175  | H  |
| 6.13123357  | 4.74209800 | 1.97886774  | H  |
| 5.77776405  | 5.44075446 | 3.60671119  | H  |
| 2.94864243  | 3.30774273 | 5.45900914  | H  |
| 4.53611389  | 4.42732153 | 2.77344921  | H  |

outcell: Unit cell vectors (Ang):

|           |           |           |
|-----------|-----------|-----------|
| 10.297401 | 0.014495  | -0.080191 |
| 5.160950  | 8.940477  | -0.203453 |
| -0.224652 | -0.526841 | 29.182353 |

**Nit8 w/o NH<sub>2</sub> on Cu step on-top via CO**

|            |            |             |    |
|------------|------------|-------------|----|
| 8.11888055 | 0.22873278 | -0.64854175 | Cu |
| 6.87074191 | 2.48071031 | -0.50414553 | Cu |
| 9.47003292 | 2.44391326 | -0.75904906 | Cu |
| 5.59067984 | 4.74355422 | -0.68154224 | Cu |
| 8.16008281 | 4.75539069 | -0.67640715 | Cu |

|             |             |             |    |
|-------------|-------------|-------------|----|
| 10.70069660 | 4.71265758  | -0.87821633 | Cu |
| 4.25149294  | 6.91447215  | -0.72136495 | Cu |
| 6.83627346  | 7.00296486  | -0.79049193 | Cu |
| 9.40981943  | 6.98494100  | -0.89131120 | Cu |
| 11.97445411 | 6.91209193  | -0.91477170 | Cu |
| 1.58000434  | 0.90949996  | -2.23659529 | Cu |
| 4.18022105  | 0.90559423  | -2.35838708 | Cu |
| 6.72542995  | 0.92245475  | -2.66193089 | Cu |
| 9.33392968  | 0.91078764  | -2.79241751 | Cu |
| 2.88244106  | 3.15528421  | -2.39301875 | Cu |
| 5.42332708  | 3.12075398  | -2.64062328 | Cu |
| 8.02233389  | 3.14070513  | -2.79777326 | Cu |
| 10.65879568 | 3.11946315  | -2.87287345 | Cu |
| 4.15884130  | 5.35291510  | -2.75656889 | Cu |
| 6.75372492  | 5.37992452  | -2.85719596 | Cu |
| 9.32072046  | 5.37790122  | -2.95853175 | Cu |
| 11.91560980 | 5.36064258  | -3.00667384 | Cu |
| 5.46140592  | 7.61426689  | -2.86682625 | Cu |
| 8.02984415  | 7.66261332  | -2.94404402 | Cu |
| 10.60952240 | 7.61620000  | -3.02694801 | Cu |
| 13.18072058 | 7.59687940  | -3.05456738 | Cu |
| 0.27476299  | 1.58981366  | -4.76823012 | Cu |
| 2.80763854  | 1.58910540  | -4.48564458 | Cu |
| 5.37125439  | 1.58769249  | -4.74708410 | Cu |
| 7.95981003  | 1.59765073  | -4.94854873 | Cu |
| 1.55574261  | 3.80927217  | -4.89122294 | Cu |
| 4.08733509  | 3.80015177  | -4.82341364 | Cu |
| 6.66419682  | 3.81406515  | -4.94944120 | Cu |
| 9.25757162  | 3.82237224  | -5.04710874 | Cu |
| 2.83778162  | 6.04602863  | -5.02995503 | Cu |
| 5.39190381  | 6.04584162  | -5.00923354 | Cu |
| 7.96950047  | 6.05249459  | -5.10177313 | Cu |
| 10.54328035 | 6.04620640  | -5.18612759 | Cu |
| 4.12104838  | 8.26981551  | -5.08457786 | Cu |
| 6.68249371  | 8.28165459  | -5.05877727 | Cu |
| 9.24972875  | 8.28674866  | -5.12446915 | Cu |
| 11.83205764 | 8.27927928  | -5.21665578 | Cu |
| 3.53453324  | -0.21885333 | 2.91308696  | H  |
| 5.32432401  | 1.25409181  | 4.92197629  | H  |
| 5.68937137  | 0.94362328  | 2.51714099  | H  |
| 2.62860728  | 0.33309768  | 2.57791005  | C  |
| 2.20038296  | -0.21566309 | 1.70446651  | H  |
| 1.88669334  | 0.32945018  | 3.40657889  | H  |
| 6.63260338  | 2.49130107  | 4.76444801  | H  |
| 5.53174507  | 2.33508792  | 4.75902698  | C  |
| 5.42345082  | 1.97180187  | 2.16690260  | C  |
| 7.70355757  | 2.78792505  | 2.20931599  | O  |
| 4.24686060  | 1.04465535  | 0.52168829  | H  |
| 6.75219386  | 2.46730750  | 1.49323736  | C  |
| 5.06755265  | 2.90171342  | 5.59620863  | H  |
| 4.19393641  | 1.89775798  | 1.23511505  | C  |
| 2.96329781  | 1.79797299  | 2.17032282  | C  |
| 4.95249864  | 2.81329753  | 3.40657895  | C  |
| 3.46296353  | 2.52575954  | 3.39062470  | N  |
| 2.71174077  | 2.81137996  | 4.36891127  | O  |
| 1.33386427  | 1.95891546  | 0.72733301  | H  |



|            |            |            |   |
|------------|------------|------------|---|
| 1.69893724 | 2.50778938 | 1.62908742 | C |
| 4.13562187 | 2.82158041 | 0.60799974 | H |
| 5.13855957 | 4.35096326 | 3.24968196 | C |
| 0.88918068 | 2.53804324 | 2.39189447 | H |
| 6.20703337 | 4.62252388 | 3.38489059 | H |
| 4.52979692 | 4.86567316 | 4.02594866 | H |
| 1.92909480 | 3.55118545 | 1.31127791 | H |
| 4.81201038 | 4.71669038 | 2.24840122 | H |

outcell: Unit cell vectors (Ang):

|           |           |           |
|-----------|-----------|-----------|
| 10.280338 | 0.001932  | -0.182257 |
| 5.142390  | 8.888979  | -0.248053 |
| -0.483819 | -0.484797 | 31.385460 |

**Nit8 w/o nitroxyl O on Cu step on-top**

|             |            |             |    |
|-------------|------------|-------------|----|
| 7.96460173  | 0.01463733 | -0.21618821 | Cu |
| 6.70163256  | 2.26969434 | 0.18604050  | Cu |
| 9.26668572  | 2.25406404 | -0.22765170 | Cu |
| 5.38920834  | 4.51974134 | -0.05652150 | Cu |
| 7.97341612  | 4.51391832 | -0.11409710 | Cu |
| 10.52725240 | 4.48523200 | -0.30087285 | Cu |
| 4.09520063  | 6.75496613 | -0.09662224 | Cu |
| 6.65769827  | 6.75601625 | -0.20631152 | Cu |
| 9.23742900  | 6.69069796 | -0.28533631 | Cu |
| 11.85340629 | 6.66168567 | -0.30534461 | Cu |
| 1.44799474  | 0.72150224 | -2.07574013 | Cu |
| 3.98770033  | 0.73030512 | -2.25702220 | Cu |
| 6.55041232  | 0.74260446 | -2.21868916 | Cu |
| 9.19628800  | 0.73258398 | -2.30226594 | Cu |
| 2.70838338  | 2.96662400 | -2.13692800 | Cu |
| 5.25833325  | 2.93094813 | -2.09633269 | Cu |
| 7.82315872  | 2.94481806 | -2.20266364 | Cu |
| 10.48741005 | 2.94931923 | -2.35354103 | Cu |
| 3.98571265  | 5.18970014 | -2.14645984 | Cu |
| 6.56479519  | 5.19969571 | -2.25808546 | Cu |
| 9.15557397  | 5.20637886 | -2.37801934 | Cu |
| 11.74947381 | 5.20077023 | -2.42543852 | Cu |
| 5.30444051  | 7.46434253 | -2.25212307 | Cu |
| 7.87716183  | 7.47204022 | -2.32282676 | Cu |
| 10.45167328 | 7.45808415 | -2.38444516 | Cu |
| 13.03450829 | 7.46950715 | -2.36172276 | Cu |
| 0.10704468  | 1.45077914 | -4.33033386 | Cu |
| 2.67033191  | 1.45802487 | -4.35496224 | Cu |
| 5.25696855  | 1.45359621 | -4.39601033 | Cu |
| 7.83203346  | 1.45340174 | -4.44214171 | Cu |
| 1.39565384  | 3.68705665 | -4.40745931 | Cu |
| 3.96849234  | 3.68643683 | -4.32652888 | Cu |
| 6.53901441  | 3.68160961 | -4.37500638 | Cu |
| 9.11339840  | 3.68225407 | -4.45157117 | Cu |
| 2.69613158  | 5.92933154 | -4.39132403 | Cu |
| 5.24409556  | 5.92216457 | -4.41435598 | Cu |
| 7.82155976  | 5.92241494 | -4.47932717 | Cu |
| 10.39988846 | 5.92084813 | -4.59640402 | Cu |
| 3.96582814  | 8.16421189 | -4.36966139 | Cu |

|             |             |             |    |
|-------------|-------------|-------------|----|
| 6.53654696  | 8.16643879  | -4.41755253 | Cu |
| 9.11631169  | 8.16767219  | -4.52005152 | Cu |
| 11.70814965 | 8.16554502  | -4.49921893 | Cu |
| 6.16543068  | 2.94706064  | 6.30264541  | O  |
| 4.92861257  | 1.08507454  | 7.44620498  | H  |
| 4.77919007  | 1.12773315  | 6.43656848  | N  |
| 4.39683749  | 3.11759735  | 4.15674840  | H  |
| 5.41079636  | 2.14148686  | 5.73410922  | C  |
| 6.87675834  | 4.36503519  | 4.35115100  | H  |
| 4.13282838  | 0.46574896  | 6.00861942  | H  |
| 5.81612681  | 4.65185879  | 2.91145035  | H  |
| 5.08076506  | 2.23688054  | 4.22539470  | C  |
| 3.20052787  | 3.04852568  | 2.02368335  | H  |
| 6.66501648  | 4.04637139  | 3.30474068  | C  |
| 3.32385776  | 0.91106985  | 3.83527672  | H  |
| 4.39628669  | 1.03016964  | 3.56074930  | C  |
| 3.36749176  | 2.10380513  | 1.45817449  | C  |
| 6.31368248  | 2.53418523  | 3.27507758  | C  |
| 2.42078546  | 1.51336785  | 1.45721689  | H  |
| 7.55633796  | 4.26516893  | 2.67104105  | H  |
| 7.95816149  | 2.07771799  | 4.68732275  | H  |
| 3.58760991  | 2.38015965  | 0.39995124  | H  |
| 4.57010786  | 1.30031220  | 2.03757464  | C  |
| 4.91952302  | 0.08254977  | 3.82957992  | H  |
| 7.57178367  | 1.71540763  | 3.70823569  | C  |
| 5.83396601  | 2.08992121  | 1.92002033  | N  |
| 7.34939084  | 0.62757117  | 3.79902112  | H  |
| 8.36792079  | 1.83067579  | 2.93852891  | H  |
| 4.70392326  | -0.04218883 | 1.27372940  | C  |
| 3.75149471  | -0.63631986 | 1.32222671  | H  |
| 5.53250066  | -0.65544794 | 1.69544577  | H  |
| 4.93567272  | 0.15006227  | 0.20020389  | H  |

outcell: Unit cell vectors (Ang):

|           |          |           |
|-----------|----------|-----------|
| 10.301547 | 0.000657 | -0.163714 |
| 5.155557  | 8.929215 | 0.084105  |
| -0.377809 | 0.566482 | 30.645425 |

**Nit9 on flat Au(111) via NO hcp site**

|             |            |             |    |
|-------------|------------|-------------|----|
| -0.11861831 | 0.07126972 | -0.21380613 | Au |
| 2.80369370  | 0.06342311 | -0.19420511 | Au |
| 5.72407679  | 0.06480441 | -0.19224954 | Au |
| 1.34643222  | 2.59798931 | -0.22184679 | Au |
| 4.24582734  | 2.58402766 | -0.29003401 | Au |
| 7.21687535  | 2.57577998 | -0.26872933 | Au |
| 2.79300121  | 5.13102748 | -0.27455281 | Au |
| 5.72013047  | 5.13897985 | -0.28378202 | Au |
| 8.65320979  | 5.11745748 | -0.22568024 | Au |
| 1.37067844  | 0.88508603 | -2.73422594 | Au |
| 4.29288419  | 0.87496547 | -2.73133789 | Au |
| 7.22062878  | 0.87257509 | -2.70758731 | Au |
| 2.82617689  | 3.41138198 | -2.76919519 | Au |
| 5.75522014  | 3.40813277 | -2.74431408 | Au |
| 8.68680482  | 3.40597698 | -2.72434023 | Au |

|             |             |             |    |
|-------------|-------------|-------------|----|
| 4.28649213  | 5.94060756  | -2.77493998 | Au |
| 7.21538696  | 5.93500345  | -2.75272340 | Au |
| 10.13909576 | 5.93322414  | -2.73934559 | Au |
| -0.05727943 | 1.69495238  | -5.23028214 | Au |
| 2.86589405  | 1.69227937  | -5.21355640 | Au |
| 5.79296564  | 1.69206995  | -5.19816825 | Au |
| 1.40246231  | 4.22250437  | -5.25245676 | Au |
| 4.32907156  | 4.21925009  | -5.23449099 | Au |
| 7.25213184  | 4.21643058  | -5.21273301 | Au |
| 2.86254338  | 6.74997193  | -5.26283319 | Au |
| 5.78775699  | 6.74826089  | -5.23784572 | Au |
| 8.71085559  | 6.74397119  | -5.22307278 | Au |
| -0.02641267 | -0.01545089 | -7.73441234 | Au |
| 2.89730632  | -0.01818168 | -7.71836365 | Au |
| 5.82297605  | -0.02286656 | -7.69408149 | Au |
| 1.43305823  | 2.50970507  | -7.74722883 | Au |
| 4.35589663  | 2.50602066  | -7.72417241 | Au |
| 7.28670366  | 2.50366146  | -7.70334061 | Au |
| 2.89201802  | 5.03856021  | -7.75787841 | Au |
| 5.81894812  | 5.03720551  | -7.73685729 | Au |
| 8.74547001  | 5.03279295  | -7.71938728 | Au |
| 4.55995644  | 1.11011575  | 4.27621640  | H  |
| 7.92812045  | 2.08167298  | 4.24149856  | H  |
| 3.85171591  | 1.89800380  | 3.93736487  | C  |
| 3.66087864  | 1.75604860  | 2.84887061  | H  |
| 8.12672539  | 3.14976503  | 3.99958588  | C  |
| 8.43264114  | 3.21408594  | 2.93107802  | H  |
| 2.88874341  | 1.77153516  | 4.48113681  | H  |
| 8.95454217  | 3.51889880  | 4.64204626  | H  |
| 5.95793317  | 2.92811492  | 8.11522027  | H  |
| 5.76743947  | 3.40667558  | 2.13774801  | O  |
| 5.72202559  | 3.47674291  | 3.42266168  | N  |
| 4.43236301  | 3.31751385  | 4.18343876  | C  |
| 6.86757959  | 4.02321949  | 4.23588396  | C  |
| 6.63819120  | 3.68750134  | 8.07314093  | N  |
| 4.95182147  | 3.52559475  | 5.59954062  | C  |
| 6.26736855  | 3.88513360  | 5.64393491  | C  |
| 7.23607339  | 3.83963267  | 8.88793931  | H  |
| 7.09899344  | 4.19311168  | 6.86504447  | C  |
| 4.28599869  | 3.41128317  | 6.47499388  | H  |
| 8.13113727  | 4.88706340  | 6.79791132  | O  |
| 3.42089963  | 4.41230022  | 3.73408964  | C  |
| 3.15868863  | 4.26056491  | 2.66160247  | H  |
| 7.13875694  | 5.50272068  | 3.83013039  | C  |
| 7.46142862  | 5.54447885  | 2.76471036  | H  |
| 2.48988709  | 4.36144740  | 4.34060953  | H  |
| 7.93070034  | 5.92856712  | 4.48243937  | H  |
| 3.85403302  | 5.43040710  | 3.84225512  | H  |
| 6.22205491  | 6.12398726  | 3.93691911  | H  |

outcell: Unit cell vectors (Ang):

|          |           |           |
|----------|-----------|-----------|
| 8.775818 | -0.008416 | 0.059533  |
| 4.380415 | 7.580053  | -0.036437 |
| 0.197467 | -0.259517 | 27.002498 |

**Nit9 on flat Au(111) via NO fcc site**

|             |             |             |    |
|-------------|-------------|-------------|----|
| -0.13025692 | 0.04630903  | -0.21891075 | Au |
| 2.78302323  | 0.05540902  | -0.18237201 | Au |
| 5.71610889  | 0.01619816  | -0.21626618 | Au |
| 1.32213152  | 2.58044860  | -0.19031656 | Au |
| 4.23705807  | 2.59217088  | -0.23370178 | Au |
| 7.19346574  | 2.59141967  | -0.21436312 | Au |
| 2.79001423  | 5.10115303  | -0.18552886 | Au |
| 5.71470379  | 5.11274489  | -0.16574173 | Au |
| 8.63138033  | 5.11006792  | -0.13061410 | Au |
| 1.35700409  | 0.87191405  | -2.71571617 | Au |
| 4.27815366  | 0.87099860  | -2.69170150 | Au |
| 7.20705758  | 0.86975536  | -2.66399812 | Au |
| 2.81227187  | 3.40219428  | -2.72082581 | Au |
| 5.74260260  | 3.40302649  | -2.69141805 | Au |
| 8.67240444  | 3.40286166  | -2.66485877 | Au |
| 4.28054007  | 5.92538105  | -2.70900228 | Au |
| 7.20419889  | 5.92794205  | -2.68096437 | Au |
| 10.12912117 | 5.91886038  | -2.66366757 | Au |
| -0.07420777 | 1.68295171  | -5.21047656 | Au |
| 2.85153915  | 1.68284579  | -5.18095161 | Au |
| 5.77561858  | 1.68434334  | -5.15686063 | Au |
| 1.38921169  | 4.21270622  | -5.21321849 | Au |
| 4.31337869  | 4.21322537  | -5.17934187 | Au |
| 7.23590770  | 4.21269835  | -5.15063721 | Au |
| 2.85192580  | 6.74099993  | -5.20931501 | Au |
| 5.77474255  | 6.73973752  | -5.17446571 | Au |
| 8.69805951  | 6.74110942  | -5.15068737 | Au |
| -0.03939485 | -0.02993480 | -7.71204805 | Au |
| 2.87949767  | -0.03051370 | -7.68262055 | Au |
| 5.80622956  | -0.03057121 | -7.65082279 | Au |
| 1.41844573  | 2.50108320  | -7.71369269 | Au |
| 4.34063710  | 2.50165949  | -7.68124378 | Au |
| 7.26890816  | 2.50023093  | -7.65352687 | Au |
| 2.88008339  | 5.02817750  | -7.71502579 | Au |
| 5.80472889  | 5.03078800  | -7.68587571 | Au |
| 8.72848985  | 5.02788655  | -7.65623161 | Au |
| 4.55394691  | -0.77889887 | 4.28753118  | H  |
| 7.89701275  | 0.20069539  | 4.25391161  | H  |
| 3.84476400  | 0.00763724  | 3.94761894  | C  |
| 3.67425819  | -0.12281866 | 2.85371007  | H  |
| 8.09799702  | 1.27099637  | 4.02387374  | C  |
| 8.39982285  | 1.34729312  | 2.95480308  | H  |
| 2.87371934  | -0.13328620 | 4.47323002  | H  |
| 8.92868063  | 1.63089686  | 4.66784025  | H  |
| 5.93725360  | 1.03723906  | 8.15316130  | H  |
| 5.72887280  | 1.59692787  | 2.16765996  | O  |
| 5.69480817  | 1.61346331  | 3.45425063  | N  |
| 4.40916149  | 1.43005933  | 4.21556076  | C  |
| 6.84232413  | 2.14620851  | 4.27267215  | C  |
| 6.61924889  | 1.79481922  | 8.10916904  | N  |
| 4.92974674  | 1.62824152  | 5.63293944  | C  |
| 6.24369404  | 1.99435090  | 5.67947553  | C  |
| 7.21690979  | 1.94866388  | 8.92398108  | H  |

|            |            |            |   |
|------------|------------|------------|---|
| 7.07822219 | 2.29945980 | 6.90002437 | C |
| 4.26434569 | 1.50456097 | 6.50736451 | H |
| 8.11196921 | 2.99110512 | 6.82992199 | O |
| 3.38300401 | 2.51786630 | 3.78289349 | C |
| 3.09390618 | 2.36195070 | 2.71837091 | H |
| 7.11697517 | 3.62865870 | 3.88211157 | C |
| 7.44707832 | 3.68001014 | 2.81946193 | H |
| 2.46699405 | 2.46533750 | 4.41164448 | H |
| 7.90410489 | 4.04758681 | 4.54440808 | H |
| 3.81436039 | 3.53820659 | 3.87562960 | H |
| 6.19901470 | 4.24780157 | 3.98934577 | H |

outcell: Unit cell vectors (Ang):

|          |           |           |
|----------|-----------|-----------|
| 8.772594 | -0.000597 | 0.088127  |
| 4.385121 | 7.584768  | -0.002700 |
| 0.280228 | -0.198395 | 26.890750 |

**Nit9 on flat Au(111) via >CO**

|             |             |             |    |
|-------------|-------------|-------------|----|
| -0.12409249 | 0.04848578  | -0.48277625 | Au |
| 2.79237315  | 0.05826418  | -0.47790262 | Au |
| 5.71906941  | 0.04547001  | -0.51756273 | Au |
| 1.32865874  | 2.58308664  | -0.48894062 | Au |
| 4.22392964  | 2.59668736  | -0.60273234 | Au |
| 7.20317215  | 2.58491418  | -0.54982185 | Au |
| 2.78880688  | 5.11293731  | -0.46765370 | Au |
| 5.72320557  | 5.10668666  | -0.51278678 | Au |
| 8.64543308  | 5.10778723  | -0.45246223 | Au |
| 1.37087387  | 0.86631475  | -3.00153495 | Au |
| 4.29583913  | 0.86137074  | -3.01931395 | Au |
| 7.22249179  | 0.85967385  | -2.99165461 | Au |
| 2.82018093  | 3.40018715  | -3.04472116 | Au |
| 5.75775840  | 3.39103649  | -3.03068180 | Au |
| 8.68531699  | 3.38950799  | -2.99518647 | Au |
| 4.28853240  | 5.91188650  | -3.02301485 | Au |
| 7.21935536  | 5.91146723  | -3.00217220 | Au |
| 10.14195597 | 5.90469686  | -2.99299179 | Au |
| -0.04453384 | 1.67101679  | -5.49737157 | Au |
| 2.87966531  | 1.67040605  | -5.49548362 | Au |
| 5.80597244  | 1.66847846  | -5.49787408 | Au |
| 1.41187614  | 4.19710736  | -5.51236205 | Au |
| 4.33868147  | 4.19718787  | -5.51033562 | Au |
| 7.26318454  | 4.19349200  | -5.48524235 | Au |
| 2.87572115  | 6.71783181  | -5.51364210 | Au |
| 5.80204445  | 6.71941697  | -5.48468143 | Au |
| 8.72281382  | 6.71531869  | -5.48445857 | Au |
| -0.00377420 | -0.04056555 | -8.01050119 | Au |
| 2.91587457  | -0.04376398 | -8.00559390 | Au |
| 5.84368456  | -0.04928264 | -7.98998948 | Au |
| 1.45330479  | 2.48410300  | -8.02505117 | Au |
| 4.37342434  | 2.48202304  | -8.01555584 | Au |
| 7.30767631  | 2.48024382  | -7.99216845 | Au |
| 2.91173821  | 5.00673288  | -8.03636122 | Au |
| 5.83743618  | 5.01144789  | -8.01395253 | Au |
| 8.76304279  | 5.00397401  | -8.00354124 | Au |

|            |             |            |   |
|------------|-------------|------------|---|
| 2.61272703 | 1.93777709  | 4.06411551 | H |
| 2.99878519 | 2.80822307  | 3.48869200 | C |
| 3.10044024 | 2.51668902  | 2.41952386 | H |
| 2.25219075 | 3.63093724  | 3.55869868 | H |
| 3.89756593 | 1.55786873  | 7.29586656 | H |
| 6.49353686 | -0.32065836 | 4.07897635 | H |
| 6.43955740 | 0.16731759  | 3.18332358 | N |
| 6.71302564 | -0.33057802 | 2.32673046 | H |
| 4.54480897 | 2.39686525  | 7.63379812 | C |
| 5.85603502 | 1.39896110  | 3.00900367 | C |
| 5.69980707 | 1.89026389  | 1.86610879 | O |
| 4.35780782 | 3.30100520  | 4.05523866 | C |
| 3.91254174 | 3.13448407  | 8.17589759 | H |
| 5.40719938 | 2.18518014  | 4.20710568 | C |
| 4.18936224 | 3.69012699  | 5.50915997 | N |
| 3.45823698 | 4.68803549  | 5.87114042 | O |
| 5.30443543 | 1.99218142  | 8.34023426 | H |
| 5.88621964 | 2.10045893  | 5.47953764 | C |
| 5.23176954 | 3.09227716  | 6.42653249 | C |
| 6.68092038 | 1.41284861  | 5.82368618 | H |
| 4.86748354 | 4.53028067  | 3.24687292 | C |
| 4.12089727 | 5.35185671  | 3.32725005 | H |
| 4.99953963 | 4.26382837  | 2.17619017 | H |
| 6.20805953 | 4.20258767  | 6.91135619 | C |
| 5.83791730 | 4.90969002  | 3.63561422 | H |
| 5.64688227 | 4.94529712  | 7.52078969 | H |
| 7.02440456 | 3.76901833  | 7.53112403 | H |
| 6.66787485 | 4.73454291  | 6.05002819 | H |

outcell: Unit cell vectors (Ang):

|          |           |           |
|----------|-----------|-----------|
| 8.773175 | -0.005172 | 0.044891  |
| 4.381601 | 7.569409  | -0.015966 |
| 0.132408 | -0.159147 | 28.424845 |

**Nit9 on flat Au(111) parallel**

|             |            |             |    |
|-------------|------------|-------------|----|
| -0.13377867 | 0.04666364 | -0.58154928 | Au |
| 2.79106510  | 0.05474511 | -0.58466838 | Au |
| 5.72174163  | 0.05638710 | -0.53080016 | Au |
| 1.32973648  | 2.57472960 | -0.61644901 | Au |
| 4.26449040  | 2.57855191 | -0.57485134 | Au |
| 7.18439974  | 2.58409936 | -0.50708441 | Au |
| 2.80004552  | 5.10147630 | -0.58189635 | Au |
| 5.72633519  | 5.10572161 | -0.54737992 | Au |
| 8.65171746  | 5.10511920 | -0.54033605 | Au |
| 1.35596996  | 0.86872582 | -3.09847533 | Au |
| 4.28520784  | 0.87390736 | -3.06355816 | Au |
| 7.21112549  | 0.87918381 | -3.01080571 | Au |
| 2.82476975  | 3.39784832 | -3.09297812 | Au |
| 5.75257257  | 3.40100975 | -3.05349175 | Au |
| 8.67267134  | 3.40347990 | -3.02238980 | Au |
| 4.29001892  | 5.92415552 | -3.07662742 | Au |
| 7.21448283  | 5.92632042 | -3.05441292 | Au |
| 10.14452400 | 5.93087005 | -3.00939755 | Au |
| -0.08625258 | 1.67163279 | -5.58628049 | Au |

|             |             |             |    |
|-------------|-------------|-------------|----|
| 2.84098135  | 1.67664181  | -5.55111846 | Au |
| 5.76739641  | 1.67979787  | -5.50964082 | Au |
| 1.38255358  | 4.19855095  | -5.58382290 | Au |
| 4.30603580  | 4.20387329  | -5.54135879 | Au |
| 7.23210744  | 4.20718140  | -5.51056388 | Au |
| 2.84754335  | 6.72432499  | -5.57304135 | Au |
| 5.77220402  | 6.72738139  | -5.53970353 | Au |
| 8.69830487  | 6.73309198  | -5.50519529 | Au |
| -0.05874608 | -0.03600867 | -8.08033767 | Au |
| 2.86653248  | -0.03359189 | -8.04551602 | Au |
| 5.79455927  | -0.02788901 | -8.00561695 | Au |
| 1.40776645  | 2.48897807  | -8.07756696 | Au |
| 4.33342697  | 2.49469257  | -8.03971121 | Au |
| 7.25864724  | 2.49730539  | -8.00279615 | Au |
| 2.87389593  | 5.01578359  | -8.07283309 | Au |
| 5.79887703  | 5.01867155  | -8.03639677 | Au |
| 8.72528292  | 5.02460951  | -7.99876627 | Au |
| 3.46537105  | 2.51306328  | 6.43613087  | H  |
| 4.68948210  | -0.62876970 | 6.43325902  | H  |
| 2.89058399  | 2.81239023  | 5.53194143  | C  |
| 1.81571065  | 2.59113293  | 5.71852261  | H  |
| 4.53835862  | -1.22865023 | 5.50855772  | C  |
| 3.64830975  | -1.88160907 | 5.65199008  | H  |
| 3.00932193  | 3.90773037  | 5.37557161  | H  |
| 5.43574407  | -1.86403137 | 5.34773486  | H  |
| 7.55742031  | 2.15384040  | 4.78006230  | H  |
| 1.92842623  | 0.06109977  | 4.61520131  | O  |
| 3.10911924  | 0.55667269  | 4.47373261  | N  |
| 3.36739358  | 2.02951073  | 4.27773460  | C  |
| 4.32427568  | -0.31775475 | 4.27001553  | C  |
| 7.81910274  | 1.29521446  | 4.29236892  | N  |
| 4.88135971  | 2.01464749  | 4.11924434  | C  |
| 5.41248851  | 0.75885320  | 4.12072912  | C  |
| 8.79620787  | 0.96707374  | 4.36614920  | H  |
| 6.86404655  | 0.34760083  | 3.97416393  | C  |
| 5.43965801  | 2.96006950  | 3.98039776  | H  |
| 7.17119660  | -0.79905691 | 3.58752078  | O  |
| 2.65727192  | 2.54165927  | 2.99270615  | C  |
| 1.55436330  | 2.41403852  | 3.07322244  | H  |
| 4.12614029  | -1.17344987 | 2.98782663  | C  |
| 3.22615182  | -1.81970666 | 3.10321320  | H  |
| 2.87847654  | 3.62068925  | 2.82859830  | H  |
| 5.02801112  | -1.79511358 | 2.80581573  | H  |
| 3.00125587  | 1.97386746  | 2.10030698  | H  |
| 3.97198530  | -0.52481317 | 2.09748769  | H  |

outcell: Unit cell vectors (Ang):

|          |           |           |
|----------|-----------|-----------|
| 8.776873 | 0.012234  | 0.115518  |
| 4.398162 | 7.578911  | 0.014144  |
| 0.348978 | -0.175655 | 28.413748 |

**Nit9 on flat Cu(111) via NO fcc site**

|             |             |             |    |
|-------------|-------------|-------------|----|
| -0.05036967 | -0.01171124 | -0.00167635 | Cu |
| 2.56791115  | 0.00316743  | 0.07041685  | Cu |

|             |            |              |    |
|-------------|------------|--------------|----|
| 5.18840744  | 0.01572112 | 0.10515870   | Cu |
| 7.81071501  | 0.04893684 | 0.13597004   | Cu |
| 1.28282281  | 2.25497142 | 0.06440827   | Cu |
| 3.89596451  | 2.25923493 | 0.10640158   | Cu |
| 6.51621550  | 2.27715978 | 0.13640470   | Cu |
| 9.13222553  | 2.31535467 | 0.16386416   | Cu |
| 2.60822398  | 4.49942364 | 0.12111647   | Cu |
| 5.22300746  | 4.51377147 | 0.14972983   | Cu |
| 7.83793817  | 4.53917276 | 0.19038883   | Cu |
| 10.46334675 | 4.56588240 | 0.22515823   | Cu |
| 3.93300784  | 6.75542496 | 0.14040311   | Cu |
| 6.55470526  | 6.77198051 | 0.17713154   | Cu |
| 9.16998509  | 6.79141212 | 0.22611501   | Cu |
| 11.79660040 | 6.81680523 | 0.25716063   | Cu |
| 1.31396379  | 0.76337764 | -2.08726821  | Cu |
| 3.92853494  | 0.75542126 | -2.04515864  | Cu |
| 6.53671355  | 0.77294486 | -2.01272787  | Cu |
| 9.16898151  | 0.82892699 | -1.98291900  | Cu |
| 2.64880648  | 3.01511756 | -2.06559900  | Cu |
| 5.23117598  | 3.01952901 | -2.04044650  | Cu |
| 7.82458639  | 3.04775386 | -1.99988097  | Cu |
| 10.48262454 | 3.06364429 | -1.93956283  | Cu |
| 3.95873573  | 5.24853324 | -2.03040037  | Cu |
| 6.53408011  | 5.26264497 | -1.99716878  | Cu |
| 9.16667543  | 5.27781578 | -1.92636889  | Cu |
| 11.80035848 | 5.30443874 | -1.88778774  | Cu |
| 5.28506129  | 7.49770111 | -2.00788743  | Cu |
| 7.88860307  | 7.54316109 | -1.93003413  | Cu |
| 10.51509034 | 7.53092934 | -1.90017421  | Cu |
| 13.15401685 | 7.58791456 | -1.85600162  | Cu |
| 0.01253961  | 1.49066780 | -4.25860159  | Cu |
| 2.62464796  | 1.48675298 | -4.21114562  | Cu |
| 5.24939355  | 1.49230125 | -4.16551272  | Cu |
| 7.87572578  | 1.53601447 | -4.14024584  | Cu |
| 1.32067044  | 3.74377716 | -4.20149353  | Cu |
| 3.88315352  | 3.72180774 | -4.21587746  | Cu |
| 6.60884874  | 3.74455945 | -4.17241644  | Cu |
| 9.20563275  | 3.80487447 | -4.09254520  | Cu |
| 2.62512740  | 6.02947542 | -4.10442292  | Cu |
| 5.26482977  | 6.09077834 | -4.19017401  | Cu |
| 7.92192391  | 6.05754746 | -4.03104672  | Cu |
| 10.52365721 | 6.05705665 | -4.06237930  | Cu |
| 3.98533933  | 8.28369612 | -4.13837699  | Cu |
| 6.62369486  | 8.29760218 | -4.10370490  | Cu |
| 9.23873783  | 8.29455353 | -4.06556099  | Cu |
| 11.85639976 | 8.32423744 | -4.03324457  | Cu |
| 3.36839102  | 6.68621195 | -7.91236391  | H  |
| 7.09282174  | 6.77844925 | -7.71503739  | H  |
| 2.94444032  | 5.68074791 | -7.69857806  | C  |
| 2.56777690  | 5.67799745 | -6.64608345  | H  |
| 2.06963337  | 5.50523135 | -8.36574286  | H  |
| 7.55885794  | 5.77845581 | -7.57324602  | C  |
| 5.45311333  | 5.55816777 | -11.74857892 | H  |
| 7.93068402  | 5.71720865 | -6.51999472  | H  |
| 5.25378839  | 4.94712257 | -7.09443269  | N  |
| 4.02603083  | 4.58149777 | -7.89339284  | C  |



|            |            |              |   |
|------------|------------|--------------|---|
| 8.43574267 | 5.67770677 | -8.24955526  | H |
| 5.24201771 | 4.59029505 | -5.71961939  | O |
| 4.62207635 | 4.62325871 | -9.29342412  | C |
| 6.32993914 | 5.03953575 | -11.69921270 | N |
| 5.98077869 | 4.68344640 | -9.28816378  | C |
| 3.97701112 | 4.55472590 | -10.18941384 | H |
| 6.53125872 | 4.64837301 | -7.85001660  | C |
| 6.96129942 | 5.08359307 | -12.50131291 | H |
| 6.89738591 | 4.66784981 | -10.48675745 | C |
| 8.08583538 | 4.30635023 | -10.40835740 | O |
| 3.42416295 | 3.17343878 | -7.61328196  | C |
| 3.04341814 | 3.10381934 | -6.56540838  | H |
| 2.56084506 | 2.98760353 | -8.29129914  | H |
| 7.16352411 | 3.25799211 | -7.55576777  | C |
| 7.53956050 | 3.20643715 | -6.50491795  | H |
| 8.02205387 | 3.10031129 | -8.24349815  | H |
| 4.16705225 | 2.36161803 | -7.76452127  | H |
| 6.43636247 | 2.43035216 | -7.70043703  | H |

outcell: Unit cell vectors (Ang):

|           |          |           |
|-----------|----------|-----------|
| 10.480729 | 0.087782 | 0.143034  |
| 5.316197  | 9.031723 | 0.144728  |
| 0.320981  | 0.191472 | 25.331454 |

#### Nit9 on flat Cu(111) via NO hcp site

|             |            |             |    |
|-------------|------------|-------------|----|
| 0.05608974  | 0.03109783 | 0.02901606  | Cu |
| 2.68032404  | 0.05325529 | 0.03588010  | Cu |
| 5.30093486  | 0.08752769 | 0.03339151  | Cu |
| 7.92140394  | 0.11252720 | 0.02196063  | Cu |
| 1.39308914  | 2.28816244 | 0.03406341  | Cu |
| 4.01921010  | 2.32168062 | 0.03456380  | Cu |
| 6.63634646  | 2.34563747 | 0.02595575  | Cu |
| 9.25725090  | 2.36746772 | 0.00749737  | Cu |
| 2.73004302  | 4.54985622 | 0.01998513  | Cu |
| 5.34733862  | 4.57545077 | 0.01736713  | Cu |
| 7.96958732  | 4.60060543 | 0.00952691  | Cu |
| 10.59466207 | 4.63430711 | 0.00240820  | Cu |
| 4.05812223  | 6.80985042 | -0.00064286 | Cu |
| 6.68092274  | 6.83318985 | -0.00209877 | Cu |
| 9.30119932  | 6.86015158 | 0.00686796  | Cu |
| 11.92507145 | 6.88707464 | -0.00434280 | Cu |
| 1.36047452  | 0.78966719 | -2.10497315 | Cu |
| 3.97991644  | 0.82814405 | -2.11096985 | Cu |
| 6.60007154  | 0.85483079 | -2.12313094 | Cu |
| 9.22687757  | 0.87588353 | -2.12487113 | Cu |
| 2.69151855  | 3.04365328 | -2.10271805 | Cu |
| 5.32636597  | 3.08508448 | -2.13628158 | Cu |
| 7.93312713  | 3.10858501 | -2.13709977 | Cu |
| 10.56776563 | 3.12571717 | -2.12056887 | Cu |
| 4.03881176  | 5.31882301 | -2.14414127 | Cu |
| 6.65419448  | 5.32951572 | -2.16929850 | Cu |
| 9.26327253  | 5.37274932 | -2.14822122 | Cu |
| 11.90159653 | 5.38450728 | -2.13505759 | Cu |
| 5.35954628  | 7.55643717 | -2.15883741 | Cu |

|             |            |              |    |
|-------------|------------|--------------|----|
| 7.98441631  | 7.58506460 | -2.16058927  | Cu |
| 10.60763508 | 7.63016190 | -2.15233491  | Cu |
| 13.21726730 | 7.65911890 | -2.15600791  | Cu |
| -0.01503191 | 1.48967402 | -4.27385931  | Cu |
| 2.60716207  | 1.52949067 | -4.26658980  | Cu |
| 5.23027511  | 1.54733896 | -4.27287646  | Cu |
| 7.86155527  | 1.55860304 | -4.28160991  | Cu |
| 1.33026530  | 3.74716286 | -4.27034239  | Cu |
| 3.93128085  | 3.77318768 | -4.21872114  | Cu |
| 6.59330471  | 3.74961281 | -4.32602392  | Cu |
| 9.23186100  | 3.80797783 | -4.22640009  | Cu |
| 2.65649952  | 6.01363767 | -4.27470355  | Cu |
| 5.26158572  | 6.06988539 | -4.32409916  | Cu |
| 7.98916147  | 6.11339479 | -4.31601059  | Cu |
| 10.57262996 | 6.09051554 | -4.27199462  | Cu |
| 3.97912049  | 8.28482617 | -4.29474863  | Cu |
| 6.61002584  | 8.33647500 | -4.27680404  | Cu |
| 9.25252872  | 8.36076470 | -4.28753883  | Cu |
| 11.85586155 | 8.35322095 | -4.32193423  | Cu |
| 4.80579110  | 7.51078704 | -8.07400509  | H  |
| 8.58357151  | 7.61505521 | -7.93262747  | H  |
| 4.40241474  | 6.50265561 | -7.83423741  | C  |
| 4.05098081  | 6.51692708 | -6.77377468  | H  |
| 3.51616070  | 6.29913955 | -8.47728118  | H  |
| 9.03862376  | 6.61533852 | -7.75641050  | C  |
| 6.95012910  | 6.40595891 | -11.89321829 | H  |
| 9.41027299  | 6.58717481 | -6.70315445  | H  |
| 6.72382653  | 5.81340093 | -7.23757159  | N  |
| 5.49604607  | 5.41461373 | -8.02301625  | C  |
| 9.91140412  | 6.48080113 | -8.43213325  | H  |
| 6.70521934  | 5.43839934 | -5.86715466  | O  |
| 6.08335393  | 5.43516175 | -9.42884831  | C  |
| 7.82303504  | 5.88156157 | -11.83684655 | N  |
| 7.44267060  | 5.50043479 | -9.42982299  | C  |
| 5.43506815  | 5.36069404 | -10.32192246 | H  |
| 7.99844778  | 5.48863602 | -7.99390839  | C  |
| 8.46942318  | 5.93661385 | -12.62664208 | H  |
| 8.36908957  | 5.48844453 | -10.62234211 | C  |
| 9.55495363  | 5.11830421 | -10.53598145 | O  |
| 4.91283012  | 4.01099968 | -7.68655857  | C  |
| 4.58659221  | 3.97039634 | -6.61810503  | H  |
| 4.01770233  | 3.80650280 | -8.31516899  | H  |
| 8.62454615  | 4.10165684 | -7.67220549  | C  |
| 9.01540684  | 4.07683452 | -6.62449591  | H  |
| 9.47341131  | 3.92016860 | -8.36657220  | H  |
| 5.64828982  | 3.19460213 | -7.84933637  | H  |
| 7.89189594  | 3.27399672 | -7.78363152  | H  |

outcell: Unit cell vectors (Ang):

|           |           |           |
|-----------|-----------|-----------|
| 10.490816 | 0.104354  | -0.012029 |
| 5.335862  | 9.033811  | -0.043308 |
| -0.037686 | -0.105715 | 25.380573 |

**Nit9 on flat Cu(111) via >CO**

|             |            |              |    |
|-------------|------------|--------------|----|
| 0.05921928  | 0.03321481 | -0.04507002  | Cu |
| 2.70468695  | 0.07879649 | -0.01366395  | Cu |
| 5.33880685  | 0.12088001 | -0.02031742  | Cu |
| 7.97291443  | 0.15830532 | -0.05081755  | Cu |
| 1.41935129  | 2.29091262 | -0.02175761  | Cu |
| 4.05662437  | 2.33417870 | -0.01081464  | Cu |
| 6.69276372  | 2.37506246 | -0.02501369  | Cu |
| 9.32947974  | 2.41015167 | -0.05228354  | Cu |
| 2.77602783  | 4.54948288 | -0.03664785  | Cu |
| 5.40923352  | 4.58975266 | -0.01714277  | Cu |
| 8.04879088  | 4.63099602 | -0.01989709  | Cu |
| 10.69189505 | 4.67778697 | -0.04347705  | Cu |
| 4.12773046  | 6.80633202 | -0.06151152  | Cu |
| 6.76624947  | 6.84998944 | -0.03228873  | Cu |
| 9.40440838  | 6.89195140 | -0.03166465  | Cu |
| 12.04225807 | 6.93289667 | -0.06155252  | Cu |
| 1.37148984  | 0.79830587 | -2.16681469  | Cu |
| 4.00752399  | 0.84037657 | -2.16285721  | Cu |
| 6.64482744  | 0.87655586 | -2.18178014  | Cu |
| 9.28661747  | 0.91160552 | -2.19581406  | Cu |
| 2.72467924  | 3.04791311 | -2.16712963  | Cu |
| 5.35943796  | 3.09354885 | -2.16105495  | Cu |
| 8.00159603  | 3.13293701 | -2.16476416  | Cu |
| 10.64825437 | 3.16643410 | -2.17955706  | Cu |
| 4.08617064  | 5.30639482 | -2.18754862  | Cu |
| 6.72119480  | 5.34781458 | -2.16622744  | Cu |
| 9.36231596  | 5.38603934 | -2.15831758  | Cu |
| 12.00037151 | 5.42667433 | -2.19185479  | Cu |
| 5.43812523  | 7.55478994 | -2.20222165  | Cu |
| 8.07275158  | 7.61511089 | -2.16871842  | Cu |
| 10.71255958 | 7.65055354 | -2.19372003  | Cu |
| 13.34769714 | 7.68656991 | -2.21894211  | Cu |
| -0.00932842 | 1.47965641 | -4.33462647  | Cu |
| 2.62980900  | 1.52657045 | -4.31617510  | Cu |
| 5.26834618  | 1.56500395 | -4.31062042  | Cu |
| 7.91398312  | 1.59182528 | -4.32401092  | Cu |
| 1.34890279  | 3.73491855 | -4.32744778  | Cu |
| 3.98042063  | 3.77737156 | -4.30406484  | Cu |
| 6.64213587  | 3.78797562 | -4.26962867  | Cu |
| 9.27355689  | 3.84913584 | -4.28257584  | Cu |
| 2.70848637  | 5.98673754 | -4.34949484  | Cu |
| 5.34467419  | 6.03303146 | -4.32688306  | Cu |
| 8.04920541  | 6.11256285 | -4.25150163  | Cu |
| 10.63770977 | 6.11397264 | -4.32082303  | Cu |
| 4.05732407  | 8.24385713 | -4.36494113  | Cu |
| 6.69439025  | 8.30903936 | -4.31488811  | Cu |
| 9.33888965  | 8.34742641 | -4.32662844  | Cu |
| 11.97321503 | 8.37080065 | -4.36379056  | Cu |
| 6.64497578  | 3.94293471 | -12.01553739 | H  |
| 7.53486544  | 2.53823219 | -8.71975607  | H  |
| 7.24172664  | 4.84603855 | -12.26996498 | C  |
| 8.09457482  | 4.53594742 | -12.91344959 | H  |
| 6.59840289  | 5.54457950 | -12.85175757 | H  |
| 8.29992131  | 3.14306941 | -8.18422906  | C  |

|             |            |              |   |
|-------------|------------|--------------|---|
| 4.31321168  | 5.56694010 | -8.55354212  | H |
| 9.29353993  | 2.66506816 | -8.33331170  | H |
| 8.65291987  | 4.59091338 | -10.20191553 | N |
| 7.78775151  | 5.54452458 | -10.99529929 | C |
| 8.06800973  | 3.13795299 | -7.09489559  | H |
| 9.77117731  | 4.15627444 | -10.66405736 | O |
| 6.70789936  | 5.83243535 | -9.96635690  | C |
| 4.78568806  | 5.62329767 | -7.65116442  | N |
| 6.98427920  | 5.30633975 | -8.73781745  | C |
| 5.81391210  | 6.43071329 | -10.22152512 | H |
| 8.35022687  | 4.59818461 | -8.71446428  | C |
| 4.22716544  | 5.71974979 | -6.78585439  | H |
| 6.13102815  | 5.43328887 | -7.51146465  | C |
| 6.66093733  | 5.37739890 | -6.36070133  | O |
| 8.61687356  | 6.80205248 | -11.38964145 | C |
| 9.48890034  | 6.47457431 | -11.99932072 | H |
| 8.00539272  | 7.51525646 | -11.98615079 | H |
| 9.45433249  | 5.40480026 | -7.96859050  | C |
| 10.43233297 | 4.89297849 | -8.11575062  | H |
| 9.23550470  | 5.46249569 | -6.87859018  | H |
| 8.99968633  | 7.33268905 | -10.49145459 | H |
| 9.53938530  | 6.44311009 | -8.35617964  | H |

outcell: Unit cell vectors (Ang):

|           |           |           |
|-----------|-----------|-----------|
| 10.551914 | 0.165180  | -0.013520 |
| 5.419387  | 9.028534  | -0.032673 |
| -0.041395 | -0.069368 | 26.332497 |

#### Nit9 on Cu adatom on-top via NO

|             |             |             |    |
|-------------|-------------|-------------|----|
| 5.27162100  | 3.11358575  | 2.07250430  | Cu |
| -0.01581020 | -0.03227689 | 0.07041151  | Cu |
| 2.60067461  | 0.04915234  | 0.13254366  | Cu |
| 5.22350790  | 0.13204996  | 0.15882923  | Cu |
| 7.81409183  | 0.13072338  | 0.15368477  | Cu |
| 1.36486442  | 2.27295312  | 0.06053577  | Cu |
| 3.96627198  | 2.33842723  | 0.11891760  | Cu |
| 6.61555489  | 2.39667660  | 0.09169877  | Cu |
| 9.20012363  | 2.44663512  | 0.13809787  | Cu |
| 2.71686307  | 4.55863858  | 0.12228838  | Cu |
| 5.33178327  | 4.65063929  | 0.11947795  | Cu |
| 7.94485530  | 4.71106874  | 0.15260362  | Cu |
| 10.54490789 | 4.74255073  | 0.17721904  | Cu |
| 4.02267462  | 6.84638296  | 0.07936709  | Cu |
| 6.63590539  | 6.92687157  | 0.15999105  | Cu |
| 9.25115014  | 7.00816420  | 0.19474735  | Cu |
| 11.84346821 | 7.02219986  | 0.18777862  | Cu |
| 1.26503616  | 0.77759045  | -2.03352648 | Cu |
| 3.89455335  | 0.86276250  | -1.99972443 | Cu |
| 6.50916517  | 0.87851467  | -2.00758756 | Cu |
| 9.09186731  | 0.92861166  | -1.95804518 | Cu |
| 2.67214895  | 3.07817729  | -2.04782779 | Cu |
| 5.28769981  | 3.13561946  | -2.04947753 | Cu |
| 7.89252232  | 3.21114488  | -2.01271952 | Cu |
| 10.49000615 | 3.25435227  | -1.96069901 | Cu |

|             |            |             |    |
|-------------|------------|-------------|----|
| 4.00903869  | 5.34679986 | -2.03943706 | Cu |
| 6.62335875  | 5.44466927 | -1.99132142 | Cu |
| 9.23489846  | 5.51667763 | -1.94917532 | Cu |
| 11.84302666 | 5.52403896 | -1.92813961 | Cu |
| 5.31120272  | 7.64359433 | -2.01750013 | Cu |
| 7.92158930  | 7.73826753 | -1.96472152 | Cu |
| 10.53140977 | 7.78922321 | -1.94182796 | Cu |
| 13.13705915 | 7.79696587 | -1.93437016 | Cu |
| -0.05677137 | 1.51676085 | -4.20821804 | Cu |
| 2.55830033  | 1.55075595 | -4.16204109 | Cu |
| 5.17653920  | 1.60025632 | -4.13938444 | Cu |
| 7.77824070  | 1.66658325 | -4.11802566 | Cu |
| 1.35599721  | 3.80239035 | -4.21304318 | Cu |
| 3.96444794  | 3.84796932 | -4.16981052 | Cu |
| 6.57753719  | 3.93498701 | -4.14141977 | Cu |
| 9.18145939  | 4.00815396 | -4.10580462 | Cu |
| 2.70558337  | 6.08706254 | -4.20682680 | Cu |
| 5.30673690  | 6.15330425 | -4.15939418 | Cu |
| 7.91877884  | 6.23901284 | -4.10137184 | Cu |
| 10.52979446 | 6.26469896 | -4.08434458 | Cu |
| 3.99953629  | 8.37792308 | -4.19723837 | Cu |
| 6.59891388  | 8.44846987 | -4.11748472 | Cu |
| 9.22231451  | 8.49054742 | -4.09508005 | Cu |
| 11.83131466 | 8.53201140 | -4.09672012 | Cu |
| 6.12954625  | 1.34341310 | 6.79398198  | H  |
| 5.46024566  | 0.92266867 | 6.01131070  | C  |
| 4.91721491  | 0.05249200 | 6.44129517  | H  |
| 6.09140245  | 0.56701563 | 5.16669018  | H  |
| 6.46845716  | 4.97171825 | 6.66056691  | H  |
| 3.23788459  | 3.54666765 | 9.23588138  | H  |
| 4.45396528  | 1.99774391 | 5.51721829  | C  |
| 3.09702449  | 2.04546042 | 7.37474671  | H  |
| 3.69537346  | 2.64762859 | 6.66629031  | C  |
| 5.20718905  | 3.19393867 | 5.01119133  | N  |
| 5.80721462  | 5.45596118 | 5.90827564  | C  |
| 5.94892164  | 3.12128852 | 3.91313730  | O  |
| 2.86392792  | 4.43792858 | 8.91013103  | N  |
| 3.82080788  | 4.00319958 | 6.68513218  | C  |
| 2.92404084  | 0.55344640 | 4.84358447  | H  |
| 3.49001211  | 1.42063868 | 4.43733235  | C  |
| 6.41921540  | 5.72071981 | 5.01838729  | H  |
| 4.65326788  | 4.50664136 | 5.49349116  | C  |
| 2.51907827  | 5.09734532 | 9.61058386  | H  |
| 4.06202367  | 1.07704435 | 3.54359354  | H  |
| 3.20935449  | 4.96653521 | 7.67240314  | C  |
| 5.37997860  | 6.38386036 | 6.34637494  | H  |
| 3.00683718  | 6.16065775 | 7.38840376  | O  |
| 2.75141556  | 2.18164439 | 4.10285521  | H  |
| 3.76044863  | 5.16803655 | 4.40290144  | C  |
| 4.38003600  | 5.46713730 | 3.52575121  | H  |
| 2.97752175  | 4.46471278 | 4.04420469  | H  |
| 3.26148695  | 6.06413917 | 4.82952262  | H  |

outcell: Unit cell vectors (Ang):

|           |          |          |
|-----------|----------|----------|
| 10.423804 | 0.214541 | 0.141065 |
| 5.396619  | 9.172974 | 0.014768 |

0.351358 -0.171974 27.172766

**Nit9 on Cu adatom on-top via >CO**

|             |            |             |    |
|-------------|------------|-------------|----|
| 5.65068747  | 3.21617669 | 2.00868530  | Cu |
| 0.00376423  | 0.06789041 | 0.03439320  | Cu |
| 2.67178857  | 0.08590149 | 0.05186516  | Cu |
| 5.32603050  | 0.09001110 | 0.08221675  | Cu |
| 7.98802059  | 0.09588446 | 0.07702040  | Cu |
| 1.35158207  | 2.29066725 | 0.08327089  | Cu |
| 4.02745930  | 2.31089991 | 0.14677692  | Cu |
| 6.69687774  | 2.28279882 | 0.02185739  | Cu |
| 9.32449717  | 2.33033771 | 0.13488746  | Cu |
| 2.69038020  | 4.51437077 | 0.11077104  | Cu |
| 5.34368443  | 4.55318037 | 0.02318843  | Cu |
| 7.96315871  | 4.50883250 | 0.22814542  | Cu |
| 10.65998793 | 4.55173950 | 0.19321946  | Cu |
| 4.02938684  | 6.73785907 | 0.09684700  | Cu |
| 6.69183398  | 6.75273509 | 0.12400188  | Cu |
| 9.33872038  | 6.75697463 | 0.16402293  | Cu |
| 12.00799227 | 6.77657473 | 0.17960278  | Cu |
| 1.36562670  | 0.75536801 | -2.07794799 | Cu |
| 4.03389385  | 0.77390106 | -2.06698912 | Cu |
| 6.68613309  | 0.77665270 | -2.08347331 | Cu |
| 9.34466499  | 0.79540429 | -2.03111143 | Cu |
| 2.71762286  | 2.97323089 | -2.02656252 | Cu |
| 5.36294708  | 2.98553802 | -2.10129415 | Cu |
| 8.03143465  | 3.00598121 | -2.04282391 | Cu |
| 10.69043278 | 3.01503801 | -1.95742753 | Cu |
| 4.04636118  | 5.19968760 | -2.07083633 | Cu |
| 6.71687499  | 5.20965797 | -2.04551753 | Cu |
| 9.36349838  | 5.21618595 | -1.93781170 | Cu |
| 12.02869288 | 5.23564236 | -1.93244132 | Cu |
| 5.39146601  | 7.41535954 | -2.02887022 | Cu |
| 8.05254745  | 7.43689418 | -1.99507443 | Cu |
| 10.70868278 | 7.45088563 | -1.96432985 | Cu |
| 13.36688236 | 7.46026942 | -1.96353909 | Cu |
| 0.03564914  | 1.44937441 | -4.20478065 | Cu |
| 2.69154270  | 1.45999505 | -4.19446681 | Cu |
| 5.35234350  | 1.47094427 | -4.23112864 | Cu |
| 8.01757917  | 1.48545562 | -4.20996103 | Cu |
| 1.37455162  | 3.67238120 | -4.15814108 | Cu |
| 4.03060742  | 3.68453388 | -4.20481898 | Cu |
| 6.69852266  | 3.69936658 | -4.19894839 | Cu |
| 9.35997534  | 3.71722506 | -4.11375232 | Cu |
| 2.70915327  | 5.89481336 | -4.17360261 | Cu |
| 5.37694348  | 5.91315986 | -4.19658342 | Cu |
| 8.04427073  | 5.92556097 | -4.12647611 | Cu |
| 10.69582470 | 5.93189124 | -4.08644588 | Cu |
| 4.05653643  | 8.11622749 | -4.16509103 | Cu |
| 6.71987017  | 8.13123769 | -4.13709345 | Cu |
| 9.37727373  | 8.14189873 | -4.11205321 | Cu |
| 12.03840376 | 8.15257887 | -4.12005853 | Cu |
| 4.99748550  | 2.69322239 | 9.75238400  | H  |

|            |             |             |   |
|------------|-------------|-------------|---|
| 3.90308433 | 2.50732098  | 9.68712102  | C |
| 3.36746667 | 3.38051749  | 10.12201009 | H |
| 3.66388450 | 1.60583041  | 10.29380335 | H |
| 6.81823446 | 1.26560690  | 7.01253439  | H |
| 5.50118275 | 5.36304850  | 6.07972974  | H |
| 3.45970261 | 2.26490589  | 8.22021061  | C |
| 3.70127971 | 4.40232693  | 7.40198613  | H |
| 3.94620580 | 3.33435345  | 7.25274127  | C |
| 4.17445677 | 1.05936309  | 7.66086262  | N |
| 6.19576494 | 0.75382003  | 6.24497619  | C |
| 3.96538223 | -0.12413989 | 8.12122102  | O |
| 5.52262012 | 4.89195198  | 5.17551287  | N |
| 4.65301321 | 2.81720021  | 6.20297042  | C |
| 1.35618647 | 2.87187254  | 8.57988115  | H |
| 1.92420725 | 2.02134800  | 8.14400855  | C |
| 6.18724168 | -0.33500702 | 6.47218023  | H |
| 4.74226283 | 1.28572171  | 6.27819014  | C |
| 5.91670895 | 5.38470683  | 4.36887297  | H |
| 1.68931696 | 1.09407863  | 8.71372097  | H |
| 5.24234912 | 3.55723464  | 5.04835426  | C |
| 6.64446432 | 0.92030443  | 5.24276896  | H |
| 5.46653401 | 2.92881677  | 3.96954160  | O |
| 1.59385012 | 1.87675279  | 7.09267495  | H |
| 3.84712798 | 0.56493627  | 5.22906226  | C |
| 3.82909559 | -0.52251349 | 5.46624124  | H |
| 2.80351739 | 0.94683180  | 5.26544646  | H |
| 4.23301978 | 0.72327557  | 4.19977919  | H |

outcell: Unit cell vectors (Ang):

|           |          |           |
|-----------|----------|-----------|
| 10.640449 | 0.053725 | 0.084388  |
| 5.364790  | 8.891676 | 0.097394  |
| 0.202677  | 0.165895 | 27.274091 |

**Nit9 on Cu adatom on-top via -NH<sub>2</sub>**

|             |            |             |    |
|-------------|------------|-------------|----|
| 5.17587696  | 2.93072271 | 1.92890971  | Cu |
| 0.04807401  | 0.02261897 | 0.04450492  | Cu |
| 2.64243262  | 0.01932344 | 0.01415617  | Cu |
| 5.23925737  | 0.03195757 | 0.01037861  | Cu |
| 7.83727235  | 0.02383881 | -0.04063248 | Cu |
| 1.34190953  | 2.27223662 | 0.01633575  | Cu |
| 3.91438863  | 2.25683747 | -0.05509986 | Cu |
| 6.54405351  | 2.26507333 | -0.04065337 | Cu |
| 9.13258294  | 2.27224663 | -0.06333529 | Cu |
| 2.64716430  | 4.50919711 | 0.02673638  | Cu |
| 5.23971975  | 4.51872924 | -0.02251788 | Cu |
| 7.83594902  | 4.51342589 | -0.03732009 | Cu |
| 10.43465416 | 4.51234153 | -0.06160249 | Cu |
| 3.94196095  | 6.75986710 | -0.01834131 | Cu |
| 6.53630939  | 6.75949771 | -0.04346141 | Cu |
| 9.13489857  | 6.76302858 | -0.05697097 | Cu |
| 11.73302707 | 6.76288621 | -0.08813436 | Cu |
| 1.29126295  | 0.73587971 | -2.13666470 | Cu |
| 3.88499136  | 0.73606369 | -2.18864292 | Cu |
| 6.47670177  | 0.74221005 | -2.20696421 | Cu |
| 9.07691511  | 0.73973374 | -2.21933152 | Cu |

|             |             |             |    |
|-------------|-------------|-------------|----|
| 2.58822463  | 2.98181275  | -2.18292187 | Cu |
| 5.18583616  | 2.98328806  | -2.24660121 | Cu |
| 7.77401159  | 2.98596153  | -2.23038158 | Cu |
| 10.37487157 | 2.98688077  | -2.23751019 | Cu |
| 3.89335680  | 5.21860562  | -2.18997046 | Cu |
| 6.48505596  | 5.22120851  | -2.21885049 | Cu |
| 9.08170931  | 5.22828569  | -2.20843711 | Cu |
| 11.68316964 | 5.22562887  | -2.23625212 | Cu |
| 5.18807501  | 7.47180372  | -2.19546967 | Cu |
| 7.78464608  | 7.47159843  | -2.21519490 | Cu |
| 10.37777613 | 7.48275760  | -2.22745682 | Cu |
| 12.97449800 | 7.47532851  | -2.27272668 | Cu |
| -0.01910534 | 1.47839590  | -4.27674619 | Cu |
| 2.57166454  | 1.47374013  | -4.33904666 | Cu |
| 5.17019770  | 1.47196201  | -4.38527116 | Cu |
| 7.77086725  | 1.47568541  | -4.37863147 | Cu |
| 1.27506350  | 3.72446226  | -4.30322659 | Cu |
| 3.86914580  | 3.72375286  | -4.37915444 | Cu |
| 6.47408100  | 3.72556618  | -4.41597481 | Cu |
| 9.06986426  | 3.72565415  | -4.38568171 | Cu |
| 2.57559281  | 5.97354152  | -4.32020584 | Cu |
| 5.17371199  | 5.97324178  | -4.36241487 | Cu |
| 7.77232443  | 5.97196094  | -4.37689643 | Cu |
| 10.36622973 | 5.97025916  | -4.39401955 | Cu |
| 3.87241494  | 8.21572875  | -4.33890564 | Cu |
| 6.47268153  | 8.21532628  | -4.36571655 | Cu |
| 9.06479064  | 8.21283781  | -4.39843462 | Cu |
| 11.66451495 | 8.21342923  | -4.42347195 | Cu |
| 0.45039005  | 4.01650461  | 5.51252084  | H  |
| -0.04159244 | 3.26244907  | 4.85910379  | C  |
| -0.27950030 | 3.73653409  | 3.87960833  | H  |
| -0.99094120 | 2.94385987  | 5.34730823  | H  |
| 2.95694390  | 2.50471182  | 7.76054219  | H  |
| 4.62742195  | 3.98760020  | 4.20616765  | H  |
| 0.86473582  | 2.01862020  | 4.64944629  | C  |
| 2.43969448  | 2.92858688  | 3.23573232  | H  |
| 2.26602064  | 2.37257203  | 4.17926043  | C  |
| 1.18423639  | 1.37850545  | 5.98394816  | N  |
| 3.13673551  | 1.42621367  | 7.55627607  | C  |
| 0.27667279  | 0.80701019  | 6.69274078  | O  |
| 5.17491831  | 3.13232719  | 4.01775702  | N  |
| 3.24003549  | 1.86304492  | 4.99438100  | C  |
| -0.09583481 | 1.44215600  | 2.73774169  | H  |
| 0.16297960  | 0.98540863  | 3.72059536  | C  |
| 2.58105242  | 0.83108639  | 8.31466478  | H  |
| 2.64869454  | 1.02686859  | 6.14111658  | C  |
| 6.16885566  | 3.29213455  | 4.25341458  | H  |
| -0.76777820 | 0.63062112  | 4.21858079  | H  |
| 4.71516751  | 1.98693673  | 4.80826778  | C  |
| 4.22300274  | 1.21393916  | 7.66119534  | H  |
| 5.54671726  | 1.19946608  | 5.26670902  | O  |
| 0.81709374  | 0.10878439  | 3.51905915  | H  |
| 2.84418253  | -0.49885821 | 5.91319998  | C  |
| 2.29665262  | -1.05601711 | 6.70604571  | H  |
| 2.43896883  | -0.80411356 | 4.92455708  | H  |
| 3.92473976  | -0.75400083 | 5.94762674  | H  |



outcell: Unit cell vectors (Ang):

|           |           |           |
|-----------|-----------|-----------|
| 10.384455 | -0.000774 | -0.111152 |
| 5.190884  | 8.987165  | -0.081269 |
| -0.300301 | -0.087654 | 27.646942 |

**Nit9 on Cu step on-top via NO**

|             |             |             |    |
|-------------|-------------|-------------|----|
| 7.96475224  | 0.10720942  | -0.14349343 | Cu |
| 6.57315828  | 2.31539221  | 0.01142566  | Cu |
| 9.23463444  | 2.35320133  | -0.16825667 | Cu |
| 5.33612269  | 4.61369524  | -0.11749129 | Cu |
| 7.92288885  | 4.60612118  | -0.08163257 | Cu |
| 10.48979914 | 4.60321519  | -0.20766028 | Cu |
| 4.06454434  | 6.82268493  | -0.10039378 | Cu |
| 6.63892538  | 6.83408768  | -0.15368293 | Cu |
| 9.21894712  | 6.83074372  | -0.20973915 | Cu |
| 11.81291262 | 6.80771248  | -0.26732208 | Cu |
| 1.43797063  | 0.82360631  | -1.84919825 | Cu |
| 4.02108008  | 0.82381777  | -1.89001220 | Cu |
| 6.57173558  | 0.83147674  | -2.14417838 | Cu |
| 9.19325790  | 0.82900390  | -2.24733414 | Cu |
| 2.73393766  | 3.06008718  | -1.90245355 | Cu |
| 5.27387067  | 3.03375729  | -2.11231841 | Cu |
| 7.86481912  | 3.05353820  | -2.21275415 | Cu |
| 10.50452774 | 3.04179854  | -2.25489588 | Cu |
| 3.99835787  | 5.27947610  | -2.18202504 | Cu |
| 6.59340766  | 5.29777572  | -2.25817798 | Cu |
| 9.17180460  | 5.29435748  | -2.31145272 | Cu |
| 11.76817147 | 5.27782308  | -2.33149572 | Cu |
| 5.31242733  | 7.55096332  | -2.23428798 | Cu |
| 7.88686217  | 7.57378140  | -2.26932105 | Cu |
| 10.46035482 | 7.54946543  | -2.33107887 | Cu |
| 13.04100429 | 7.52641029  | -2.40404123 | Cu |
| 0.13579860  | 1.54354912  | -4.21236724 | Cu |
| 2.70059425  | 1.54555358  | -4.05824367 | Cu |
| 5.26089033  | 1.54426807  | -4.26939681 | Cu |
| 7.84899225  | 1.55110596  | -4.39813452 | Cu |
| 1.42512631  | 3.76914302  | -4.25367952 | Cu |
| 3.97811455  | 3.76742169  | -4.27736705 | Cu |
| 6.55892023  | 3.77610334  | -4.37978042 | Cu |
| 9.14452222  | 3.77693178  | -4.43388573 | Cu |
| 2.70194884  | 6.01056208  | -4.36815156 | Cu |
| 5.27279959  | 6.01286042  | -4.40450638 | Cu |
| 7.85517285  | 6.01612269  | -4.44894135 | Cu |
| 10.43427303 | 6.01280164  | -4.50375425 | Cu |
| 3.98772458  | 8.24274919  | -4.40821112 | Cu |
| 6.56704757  | 8.25477179  | -4.40964247 | Cu |
| 9.14179350  | 8.25690723  | -4.45252684 | Cu |
| 11.72269863 | 8.25048342  | -4.53103696 | Cu |
| 8.30998635  | -0.51985084 | 4.44676302  | H  |
| 8.53219830  | 1.25948023  | 4.68860107  | H  |
| 8.11861165  | 0.48408699  | 4.00706679  | C  |
| 8.65417258  | 0.54996175  | 3.03284001  | H  |

|            |             |            |   |
|------------|-------------|------------|---|
| 6.59824285 | 0.69994755  | 3.77310880 | C |
| 6.18485123 | -1.42981754 | 3.31542166 | H |
| 5.79165502 | 0.07024676  | 5.82810649 | H |
| 5.79562876 | 0.86075834  | 5.05538550 | C |
| 6.01167924 | -0.42539798 | 2.86976375 | C |
| 5.19392317 | 1.42310818  | 7.67847485 | H |
| 6.51561108 | -0.40768179 | 1.86999752 | H |
| 6.36389986 | 2.04848268  | 3.16841590 | N |
| 6.99195459 | 2.44478536  | 2.08143729 | O |
| 6.61968533 | 4.31445955  | 4.72565494 | H |
| 4.32887256 | 1.90458091  | 7.43221329 | N |
| 5.07274295 | 2.01588688  | 5.09020645 | C |
| 4.91946879 | -0.29546574 | 2.70505013 | H |
| 5.72720661 | 4.29528416  | 4.06113162 | C |
| 5.25722478 | 2.83910930  | 3.80265160 | C |
| 3.74423895 | 2.25777661  | 8.19188400 | H |
| 4.13934970 | 2.47835261  | 6.18089909 | C |
| 5.99812437 | 4.77942748  | 3.09526084 | H |
| 4.90781385 | 4.87103530  | 4.54375008 | H |
| 3.23522800 | 3.30637109  | 5.96870678 | O |
| 3.98784806 | 2.81880203  | 2.89980517 | C |
| 3.66701026 | 1.77855909  | 2.67342863 | H |
| 4.20609750 | 3.33043313  | 1.93072726 | H |
| 3.15421594 | 3.34365590  | 3.41314271 | H |

outcell: Unit cell vectors (Ang):

|           |           |           |
|-----------|-----------|-----------|
| 10.307224 | 0.005220  | -0.190296 |
| 5.157557  | 8.921327  | -0.152153 |
| -0.490128 | -0.172656 | 28.970497 |

### Nit9 on Cu step on-top via >CO

|             |            |             |    |
|-------------|------------|-------------|----|
| 7.99958085  | 0.13280962 | -0.10209022 | Cu |
| 6.63406561  | 2.36769888 | -0.06040853 | Cu |
| 9.22594983  | 2.39996729 | -0.08401504 | Cu |
| 5.41393645  | 4.66013482 | -0.15171600 | Cu |
| 7.97513942  | 4.62581099 | -0.02529320 | Cu |
| 10.54191344 | 4.61897301 | -0.12734512 | Cu |
| 4.10095777  | 6.84894657 | -0.13177019 | Cu |
| 6.69590528  | 6.85666457 | -0.14796832 | Cu |
| 9.27354907  | 6.84363905 | -0.18512075 | Cu |
| 11.85139553 | 6.84578820 | -0.16797814 | Cu |
| 1.51775414  | 0.87989309 | -1.97970343 | Cu |
| 4.09442168  | 0.87759149 | -2.01068635 | Cu |
| 6.65451274  | 0.86711147 | -2.18748892 | Cu |
| 9.27041599  | 0.87906631 | -2.17650709 | Cu |
| 2.80291352  | 3.11193010 | -2.01117495 | Cu |
| 5.34913289  | 3.09404144 | -2.19478342 | Cu |
| 7.93406770  | 3.10060770 | -2.19338493 | Cu |
| 10.56566903 | 3.09038121 | -2.17355255 | Cu |
| 4.07318361  | 5.33107332 | -2.22621739 | Cu |
| 6.67596792  | 5.34800901 | -2.26737419 | Cu |
| 9.24904321  | 5.33939544 | -2.27156169 | Cu |
| 11.83623399 | 5.32736528 | -2.24173911 | Cu |
| 5.38870274  | 7.59967541 | -2.23133133 | Cu |

|             |             |             |    |
|-------------|-------------|-------------|----|
| 7.96513663  | 7.61432833  | -2.23702861 | Cu |
| 10.54092455 | 7.59378430  | -2.27041933 | Cu |
| 13.11941651 | 7.57435348  | -2.28422843 | Cu |
| 0.22661187  | 1.58274693  | -4.30625440 | Cu |
| 2.79473354  | 1.58694850  | -4.18413723 | Cu |
| 5.35925467  | 1.57558951  | -4.33464844 | Cu |
| 7.95082796  | 1.58292745  | -4.38349886 | Cu |
| 1.50936889  | 3.81000226  | -4.34610510 | Cu |
| 4.06802622  | 3.81101567  | -4.35014894 | Cu |
| 6.65688589  | 3.81545566  | -4.40014860 | Cu |
| 9.24045635  | 3.81091520  | -4.37079210 | Cu |
| 2.79374638  | 6.05290494  | -4.42638416 | Cu |
| 5.36757640  | 6.05629621  | -4.42744594 | Cu |
| 7.95220350  | 6.05783337  | -4.43388839 | Cu |
| 10.52908809 | 6.04710973  | -4.45876166 | Cu |
| 4.08223370  | 8.28382897  | -4.43222956 | Cu |
| 6.66216796  | 8.29673961  | -4.38859875 | Cu |
| 9.23918486  | 8.29595622  | -4.41122947 | Cu |
| 11.82133128 | 8.28083372  | -4.45987213 | Cu |
| 5.58885378  | -1.23264786 | 3.92708949  | H  |
| 4.16118810  | -2.00320085 | 3.13094615  | H  |
| 4.79268831  | -1.08720689 | 3.16277521  | C  |
| 5.27564615  | -0.95598245 | 2.16632791  | H  |
| 4.83012708  | 0.17664488  | 7.13981137  | H  |
| 2.43009662  | -1.04477013 | 5.06762288  | O  |
| 3.10042238  | -0.11047865 | 7.56760982  | H  |
| 3.82154941  | 0.64348293  | 7.18023467  | C  |
| 3.26001973  | -0.08577524 | 4.85245671  | N  |
| 3.90261406  | 0.13476042  | 3.50177657  | C  |
| 2.13755274  | -0.56227118 | 2.41888332  | H  |
| 3.35556249  | 1.10504113  | 5.77364408  | C  |
| 4.70347394  | 1.41103404  | 3.80370758  | C  |
| 3.85313422  | 1.50116428  | 7.88897005  | H  |
| 2.79488327  | 0.33798350  | 2.42600564  | C  |
| 5.64850096  | 1.98270331  | 2.79246710  | C  |
| 5.47571466  | 1.70495008  | 1.56684245  | O  |
| 4.38998235  | 1.93297314  | 5.02610788  | C  |
| 6.67083816  | 2.78708963  | 3.20526684  | N  |
| 6.87739522  | 2.94632782  | 4.19099591  | H  |
| 3.24014132  | 0.47715721  | 1.41734824  | H  |
| 7.27545883  | 3.19902216  | 2.47601023  | H  |
| 1.21998824  | 1.04194164  | 6.20424051  | H  |
| 4.79283560  | 2.87191122  | 5.44952199  | H  |
| 1.96392612  | 1.79740140  | 5.86404707  | C  |
| 2.16571861  | 1.22902368  | 2.64757759  | H  |
| 1.64333403  | 2.18211542  | 4.87192956  | H  |
| 1.97759391  | 2.64491927  | 6.58486469  | H  |

outcell: Unit cell vectors (Ang):

|           |           |           |
|-----------|-----------|-----------|
| 10.311570 | -0.000428 | -0.018676 |
| 5.155071  | 8.928646  | -0.071086 |
| -0.052079 | -0.192451 | 29.687165 |

**Nit9 on Cu step on-top via -NH<sub>2</sub>**

|             |            |             |    |
|-------------|------------|-------------|----|
| 8.04464699  | 0.23532523 | -0.31931915 | Cu |
| 6.81426512  | 2.45249919 | -0.37438295 | Cu |
| 9.36885474  | 2.45605560 | -0.40561900 | Cu |
| 5.50678208  | 4.67519543 | -0.31255963 | Cu |
| 8.10126877  | 4.70040419 | -0.39372729 | Cu |
| 10.65344038 | 4.69052745 | -0.49740592 | Cu |
| 4.20620496  | 6.96689000 | -0.35991141 | Cu |
| 6.79513887  | 6.98770480 | -0.46778303 | Cu |
| 9.36279110  | 6.92499170 | -0.51360084 | Cu |
| 11.93146726 | 6.91704821 | -0.55051570 | Cu |
| 1.58753489  | 0.92507641 | -1.98890028 | Cu |
| 4.18062327  | 0.92994521 | -2.05358437 | Cu |
| 6.71624723  | 0.91742802 | -2.41747454 | Cu |
| 9.33056077  | 0.91901128 | -2.45674936 | Cu |
| 2.88212291  | 3.16724979 | -2.07940025 | Cu |
| 5.40963500  | 3.13949607 | -2.38909294 | Cu |
| 8.03199180  | 3.15951022 | -2.53944509 | Cu |
| 10.64597421 | 3.13185233 | -2.52438162 | Cu |
| 4.14888624  | 5.37680578 | -2.39846822 | Cu |
| 6.72529790  | 5.38793120 | -2.50418523 | Cu |
| 9.31701775  | 5.39135880 | -2.62631557 | Cu |
| 11.90536344 | 5.37406102 | -2.61965402 | Cu |
| 5.44728775  | 7.63562224 | -2.52213341 | Cu |
| 8.03169754  | 7.66964267 | -2.57384214 | Cu |
| 10.59975794 | 7.63452958 | -2.64902008 | Cu |
| 13.16850392 | 7.61556032 | -2.71368544 | Cu |
| 0.28966175  | 1.61469675 | -4.41248306 | Cu |
| 2.84703310  | 1.62018032 | -4.20729868 | Cu |
| 5.39425461  | 1.61535145 | -4.51924128 | Cu |
| 7.98876704  | 1.61442218 | -4.64830083 | Cu |
| 1.57406477  | 3.84107082 | -4.49327296 | Cu |
| 4.11113164  | 3.84265049 | -4.52524157 | Cu |
| 6.69045325  | 3.84592644 | -4.64582394 | Cu |
| 9.28160479  | 3.84526980 | -4.74109554 | Cu |
| 2.84978484  | 6.07898712 | -4.61700237 | Cu |
| 5.41016991  | 6.07732909 | -4.67407759 | Cu |
| 7.98314165  | 6.08193681 | -4.74263194 | Cu |
| 10.56686138 | 6.07922185 | -4.82595240 | Cu |
| 4.12914628  | 8.30528335 | -4.71990620 | Cu |
| 6.70425602  | 8.31974312 | -4.69963214 | Cu |
| 9.27604066  | 8.31995300 | -4.76428229 | Cu |
| 11.84963673 | 8.30384940 | -4.89728037 | Cu |
| 7.52476934  | 8.38978104 | 3.27594516  | H  |
| 8.94242579  | 8.29027545 | 4.41838860  | H  |
| 5.47554120  | 6.90434352 | 2.38661033  | O  |
| 8.35324091  | 7.74812602 | 3.64445712  | C  |
| 5.98145056  | 7.40963933 | 5.07996703  | H  |
| 9.02413775  | 7.51883347 | 2.78592315  | H  |
| 7.36898606  | 7.30487206 | 6.24272095  | H  |
| 6.81498413  | 6.76881763 | 5.44080068  | C  |
| 5.91585068  | 5.75072619 | 2.56192150  | C  |
| 7.78857154  | 6.44523463 | 4.27919857  | C  |
| 4.19129921  | 4.81941159 | 1.97449580  | H  |
| 7.20996881  | 5.46596347 | 3.24847444  | C  |

|             |            |            |   |
|-------------|------------|------------|---|
| 5.20313208  | 4.63657553 | 2.03087786 | N |
| 6.38840537  | 5.83787904 | 5.87600613 | H |
| 9.75939170  | 6.06656134 | 5.67936303 | O |
| 10.50750200 | 5.56550630 | 2.48043832 | H |
| 8.93394101  | 5.61150767 | 4.80464030 | N |
| 8.03550865  | 4.39259935 | 3.04563774 | C |
| 5.42510262  | 3.71790092 | 2.43530767 | H |
| 10.60201475 | 4.70051724 | 3.17453618 | C |
| 9.26961279  | 4.42510202 | 3.93376386 | C |
| 11.39195166 | 4.92989405 | 3.92639756 | H |
| 7.87292107  | 3.58127296 | 2.30800201 | H |
| 10.90708659 | 3.81472298 | 2.57257212 | H |
| 9.39747768  | 3.15253652 | 4.81551805 | C |
| 8.43841360  | 2.92330196 | 5.33023228 | H |
| 10.17769323 | 3.32312276 | 5.59025299 | H |
| 9.68787457  | 2.27316134 | 4.19807590 | H |

outcell: Unit cell vectors (Ang):

|           |           |           |
|-----------|-----------|-----------|
| 10.289390 | -0.001875 | -0.223374 |
| 5.143899  | 8.912307  | -0.299553 |
| -0.638189 | -0.606231 | 30.231001 |

#### Nit9 w/o O on Cu step on-top via NH<sub>2</sub>

|             |            |             |    |
|-------------|------------|-------------|----|
| 8.00844064  | 0.14920362 | -0.13787750 | Cu |
| 6.74641103  | 2.39207838 | 0.02314943  | Cu |
| 9.34170976  | 2.38234540 | -0.23070010 | Cu |
| 5.43461560  | 4.64909873 | -0.21609575 | Cu |
| 8.01979773  | 4.66412266 | -0.20991306 | Cu |
| 10.57117149 | 4.63889491 | -0.26784742 | Cu |
| 4.12463375  | 6.86588463 | -0.22499583 | Cu |
| 6.70842626  | 6.89672853 | -0.25587199 | Cu |
| 9.28978214  | 6.87948928 | -0.27883239 | Cu |
| 11.85976053 | 6.86033788 | -0.29220784 | Cu |
| 1.53198239  | 0.89199144 | -1.96458576 | Cu |
| 4.09890283  | 0.88470410 | -2.12951244 | Cu |
| 6.66204576  | 0.88181571 | -2.20153884 | Cu |
| 9.26855779  | 0.86969191 | -2.25859450 | Cu |
| 2.82584362  | 3.12171797 | -2.04222556 | Cu |
| 5.37392838  | 3.08067763 | -2.20630659 | Cu |
| 7.94780705  | 3.09537146 | -2.26898853 | Cu |
| 10.59648895 | 3.10210390 | -2.31597732 | Cu |
| 4.09053626  | 5.33391532 | -2.28860030 | Cu |
| 6.67681092  | 5.35793441 | -2.35440775 | Cu |
| 9.26277325  | 5.35986100 | -2.40190236 | Cu |
| 11.84666958 | 5.34300001 | -2.38067985 | Cu |
| 5.39810416  | 7.61387305 | -2.33444525 | Cu |
| 7.97762189  | 7.63219360 | -2.34317982 | Cu |
| 10.54537269 | 7.61539469 | -2.38998563 | Cu |
| 13.11472349 | 7.58561400 | -2.42436024 | Cu |
| 0.22864077  | 1.59102211 | -4.32120251 | Cu |
| 2.78285874  | 1.60033690 | -4.23871826 | Cu |
| 5.36103300  | 1.58819653 | -4.37405153 | Cu |
| 7.94423733  | 1.59275269 | -4.44198244 | Cu |
| 1.51532555  | 3.82712720 | -4.42009872 | Cu |

|             |             |             |    |
|-------------|-------------|-------------|----|
| 4.07269820  | 3.82105164  | -4.37787207 | Cu |
| 6.65372851  | 3.82487232  | -4.45738124 | Cu |
| 9.23521783  | 3.82645087  | -4.49095649 | Cu |
| 2.80126883  | 6.06818590  | -4.49393394 | Cu |
| 5.36602066  | 6.06710351  | -4.51116895 | Cu |
| 7.94788986  | 6.07005797  | -4.52846101 | Cu |
| 10.52282249 | 6.06386601  | -4.58229931 | Cu |
| 4.08306275  | 8.29679768  | -4.52850151 | Cu |
| 6.65946185  | 8.30892789  | -4.49404493 | Cu |
| 9.23126531  | 8.30389928  | -4.55818998 | Cu |
| 11.81190008 | 8.30097015  | -4.58779954 | Cu |
| 5.67535823  | 4.83983908  | 3.29040164  | H  |
| 7.39165028  | 5.26393772  | 3.67869528  | H  |
| 6.73853948  | 4.56566077  | 3.10982472  | C  |
| 6.94715671  | 4.68435541  | 2.01973148  | H  |
| 4.17100699  | 3.02985502  | 5.94988628  | H  |
| 7.47376617  | 3.73709556  | 5.87888389  | O  |
| 5.35310015  | 2.85268093  | 7.30007485  | H  |
| 4.86968575  | 2.32285161  | 6.44835763  | C  |
| 6.79884329  | 3.03051332  | 5.04432236  | N  |
| 7.02465217  | 3.11489234  | 3.55688162  | C  |
| 9.16885632  | 3.39635376  | 3.83473937  | H  |
| 5.98266955  | 1.84339586  | 5.47541550  | C  |
| 5.99980365  | 2.07751250  | 3.05271894  | C  |
| 4.28954719  | 1.46133485  | 6.84717527  | H  |
| 8.49833909  | 2.71641225  | 3.26207517  | C  |
| 5.70501568  | 1.85252463  | 1.61453558  | C  |
| 5.47192699  | 1.37997263  | 4.11938001  | C  |
| 4.52899608  | 1.24738791  | 1.35429975  | N  |
| 3.81699234  | 1.05320802  | 2.07303256  | H  |
| 8.72682835  | 2.81298374  | 2.17185456  | H  |
| 4.27337640  | 1.00488762  | 0.37794530  | H  |
| 7.42015544  | 1.33797035  | 7.03142640  | H  |
| 4.76934006  | 0.52899399  | 4.04194728  | H  |
| 6.90583256  | 0.81497676  | 6.19368155  | C  |
| 8.70349319  | 1.66686293  | 3.56833557  | H  |
| 7.67841881  | 0.41368302  | 5.50309147  | H  |
| 6.32204910  | -0.03863602 | 6.60398216  | H  |

outcell: Unit cell vectors (Ang):

|           |           |           |
|-----------|-----------|-----------|
| 10.298003 | -0.000360 | -0.090022 |
| 5.148805  | 8.935076  | -0.174373 |
| -0.252817 | -0.417622 | 29.065996 |

**Nit9 w/o NH<sub>2</sub> on Cu step on-top via CO**

|             |            |             |    |
|-------------|------------|-------------|----|
| 8.08118541  | 0.21365953 | -0.47555068 | Cu |
| 6.78757624  | 2.41491393 | -0.42348371 | Cu |
| 9.43321845  | 2.42960671 | -0.56709058 | Cu |
| 5.50971116  | 4.68547531 | -0.49838333 | Cu |
| 8.11661074  | 4.70575740 | -0.43076605 | Cu |
| 10.68213114 | 4.67445647 | -0.63096161 | Cu |
| 4.21290902  | 6.90894228 | -0.51475480 | Cu |
| 6.78607489  | 6.94409195 | -0.59353528 | Cu |
| 9.36926320  | 6.91324260 | -0.66962376 | Cu |

|             |             |             |    |
|-------------|-------------|-------------|----|
| 11.93712506 | 6.88951930  | -0.67513806 | Cu |
| 1.57836882  | 0.89425301  | -2.05302826 | Cu |
| 4.19242089  | 0.89316738  | -2.16396661 | Cu |
| 6.72036914  | 0.90346055  | -2.56168646 | Cu |
| 9.32680917  | 0.89614986  | -2.61004029 | Cu |
| 2.88601309  | 3.14484773  | -2.17771640 | Cu |
| 5.41264641  | 3.10489801  | -2.51033361 | Cu |
| 8.02305310  | 3.13034774  | -2.63108633 | Cu |
| 10.65594113 | 3.10212811  | -2.66337937 | Cu |
| 4.14679044  | 5.34786408  | -2.57249826 | Cu |
| 6.74558864  | 5.35677629  | -2.64285992 | Cu |
| 9.31145723  | 5.35150389  | -2.72279335 | Cu |
| 11.89972284 | 5.34433253  | -2.76398386 | Cu |
| 5.45206576  | 7.60453003  | -2.66269233 | Cu |
| 8.02079905  | 7.65743569  | -2.71112939 | Cu |
| 10.59358514 | 7.60246068  | -2.78831149 | Cu |
| 13.16213942 | 7.58769384  | -2.80392090 | Cu |
| 0.29736665  | 1.57520503  | -4.59398530 | Cu |
| 2.82481686  | 1.57458012  | -4.27705045 | Cu |
| 5.37563918  | 1.57845150  | -4.63710288 | Cu |
| 7.97711623  | 1.58681710  | -4.78753935 | Cu |
| 1.57187456  | 3.79889388  | -4.68763864 | Cu |
| 4.09529678  | 3.79346062  | -4.65216617 | Cu |
| 6.67747179  | 3.80638026  | -4.77698941 | Cu |
| 9.27246979  | 3.80976535  | -4.86186487 | Cu |
| 2.84405880  | 6.03621133  | -4.81353330 | Cu |
| 5.40259251  | 6.03612789  | -4.80792284 | Cu |
| 7.97844655  | 6.04082689  | -4.86255847 | Cu |
| 10.54939205 | 6.03427167  | -4.95063334 | Cu |
| 4.12994625  | 8.26135991  | -4.85608676 | Cu |
| 6.69295146  | 8.27543511  | -4.83660276 | Cu |
| 9.25548665  | 8.28150076  | -4.89173082 | Cu |
| 11.83424055 | 8.26744559  | -4.98658624 | Cu |
| 7.81317499  | 2.29437618  | 4.64668684  | H  |
| 6.67953141  | 1.53649025  | 5.85282577  | H  |
| 7.79687026  | 3.24593068  | 2.08504052  | O  |
| 7.00915827  | 1.54022525  | 4.78966103  | C  |
| 6.04128115  | 4.04758429  | 4.06700547  | H  |
| 7.42648869  | 0.53761488  | 4.54809761  | H  |
| 4.86152707  | 3.31389156  | 5.23500577  | H  |
| 5.23802014  | 3.28876738  | 4.18805178  | C  |
| 6.98731954  | 2.45684890  | 1.55415062  | C  |
| 5.79209002  | 1.87373219  | 3.88243814  | C  |
| 6.07125917  | 1.61915761  | 2.39277044  | C  |
| 4.39702199  | 3.54677737  | 3.50665908  | H  |
| 4.15637002  | 0.67708609  | 5.26264457  | O  |
| 6.15835935  | -1.48801485 | 3.65703475  | H  |
| 4.70093802  | 0.84974537  | 4.11818406  | N  |
| 5.38773885  | 0.53008765  | 1.92637080  | C  |
| 5.07089946  | -1.52997802 | 3.43108684  | C  |
| 4.53395088  | -0.13843506 | 2.98491858  | C  |
| 4.52931038  | -1.83575532 | 4.35424726  | H  |
| 5.44674964  | 0.15769926  | 0.88209434  | H  |
| 4.90680257  | -2.29273931 | 2.63484284  | H  |
| 3.03850332  | -0.23548922 | 2.58333498  | C  |
| 2.66089344  | 0.72914211  | 2.17709378  | H  |

|            |             |            |   |
|------------|-------------|------------|---|
| 2.43547086 | -0.51499854 | 3.47554546 | H |
| 2.90595484 | -1.02103567 | 1.79677789 | H |

outcell: Unit cell vectors (Ang):

|           |           |           |
|-----------|-----------|-----------|
| 10.275357 | -0.000830 | -0.159764 |
| 5.138188  | 8.897064  | -0.183654 |
| -0.441082 | -0.319221 | 29.982271 |

**Nit9 w/o nitroxyl O on Cu step on-top**

|             |             |             |    |
|-------------|-------------|-------------|----|
| 7.90050514  | 0.01089977  | -0.10029856 | Cu |
| 6.59755474  | 2.25713237  | 0.22208371  | Cu |
| 9.18897150  | 2.25325324  | -0.09636126 | Cu |
| 5.34190939  | 4.51755329  | -0.01575078 | Cu |
| 7.93006115  | 4.51924321  | -0.03414983 | Cu |
| 10.47710411 | 4.47869791  | -0.15045460 | Cu |
| 4.06871538  | 6.76073130  | -0.05205691 | Cu |
| 6.63409219  | 6.75594408  | -0.11025673 | Cu |
| 9.20637088  | 6.71426174  | -0.17444794 | Cu |
| 11.82115465 | 6.64655597  | -0.15775067 | Cu |
| 1.41176982  | 0.73647968  | -1.96916640 | Cu |
| 3.96843482  | 0.73913083  | -2.05954822 | Cu |
| 6.52496816  | 0.75484040  | -2.09218451 | Cu |
| 9.16565507  | 0.74111565  | -2.18405818 | Cu |
| 2.68518680  | 2.98063535  | -2.01891858 | Cu |
| 5.23241631  | 2.95077387  | -2.03389603 | Cu |
| 7.80255819  | 2.95695547  | -2.11515646 | Cu |
| 10.46074306 | 2.95464863  | -2.20499866 | Cu |
| 3.96545347  | 5.20354097  | -2.10089058 | Cu |
| 6.55230120  | 5.21294201  | -2.18951760 | Cu |
| 9.14278692  | 5.21500830  | -2.25827385 | Cu |
| 11.72780588 | 5.20325847  | -2.27329649 | Cu |
| 5.28793545  | 7.46858142  | -2.17552054 | Cu |
| 7.85917454  | 7.48851682  | -2.21524255 | Cu |
| 10.43690016 | 7.46723597  | -2.25937320 | Cu |
| 13.00953459 | 7.46868791  | -2.22446022 | Cu |
| 0.10564386  | 1.46816436  | -4.27676057 | Cu |
| 2.66896880  | 1.46892111  | -4.20062295 | Cu |
| 5.24343963  | 1.47076774  | -4.24798849 | Cu |
| 7.82578941  | 1.47129009  | -4.33407350 | Cu |
| 1.39274393  | 3.69990243  | -4.33960015 | Cu |
| 3.95655198  | 3.70099943  | -4.25198606 | Cu |
| 6.53234909  | 3.69678896  | -4.30089613 | Cu |
| 9.11062136  | 3.69702345  | -4.33926363 | Cu |
| 2.69187670  | 5.94561588  | -4.33853356 | Cu |
| 5.24675527  | 5.93540291  | -4.35130529 | Cu |
| 7.82764532  | 5.93549428  | -4.38558907 | Cu |
| 10.40554518 | 5.93448819  | -4.46840541 | Cu |
| 3.97199013  | 8.17475267  | -4.31416223 | Cu |
| 6.54525575  | 8.17731579  | -4.33438172 | Cu |
| 9.12206074  | 8.18173300  | -4.37839866 | Cu |
| 11.70927126 | 8.18166762  | -4.37335996 | Cu |
| 3.92150426  | -0.82354329 | 1.95350562  | H  |
| 5.69540347  | -0.63695373 | 2.28752033  | H  |
| 4.81946392  | -0.17996917 | 1.77507908  | C  |



|            |             |            |   |
|------------|-------------|------------|---|
| 5.03361849 | -0.17016615 | 0.67759714 | H |
| 4.58565156 | 1.28658101  | 2.25530546 | C |
| 2.40267394 | 1.21788396  | 1.78319683 | H |
| 3.67108126 | 0.74144053  | 4.29762160 | H |
| 4.46299576 | 1.30799739  | 3.77195457 | C |
| 3.29746922 | 1.85183932  | 1.57753532 | C |
| 4.76685941 | 0.53496270  | 6.40176845 | H |
| 3.43706828 | 1.88749487  | 0.47115746 | H |
| 5.78922521 | 2.13161867  | 1.98073372 | N |
| 7.99421529 | 1.43050150  | 3.55558962 | H |
| 5.04068104 | 1.47194573  | 6.69579505 | N |
| 5.40581291 | 2.10119387  | 4.34315012 | C |
| 3.08742492 | 2.88476386  | 1.93244906 | H |
| 7.78293304 | 2.52150490  | 3.49891922 | C |
| 6.26647313 | 2.77646722  | 3.25271928 | C |
| 5.19386399 | 1.64323617  | 7.69149412 | H |
| 5.58336318 | 2.39745584  | 5.81348474 | C |
| 8.38419929 | 2.94760158  | 2.66076520 | H |
| 8.10544098 | 3.00321310  | 4.44952449 | H |
| 6.15609244 | 3.42353603  | 6.22579913 | O |
| 5.99126389 | 4.31374730  | 3.24979313 | C |
| 4.91672362 | 4.51145506  | 3.03315193 | H |
| 6.60218048 | 4.80205146  | 2.45176940 | H |
| 6.24140318 | 4.76323376  | 4.23636601 | H |

outcell: Unit cell vectors (Ang):

|           |          |           |
|-----------|----------|-----------|
| 10.302186 | 0.000641 | -0.077922 |
| 5.153965  | 8.919781 | 0.094291  |
| -0.149379 | 0.453866 | 30.319189 |

#### O atom on Cu hcp site

|             |            |             |    |
|-------------|------------|-------------|----|
| 0.09936520  | 0.05928594 | -0.15699442 | Cu |
| 2.71797561  | 0.06910058 | -0.12951067 | Cu |
| 5.33083323  | 0.08618305 | -0.10882013 | Cu |
| 7.94979526  | 0.09889932 | -0.08266098 | Cu |
| 1.42249611  | 2.32200432 | -0.14552588 | Cu |
| 4.03992432  | 2.33681833 | -0.11631806 | Cu |
| 6.64965483  | 2.34562970 | -0.09615883 | Cu |
| 9.25872708  | 2.35311909 | -0.07631266 | Cu |
| 2.74309782  | 4.58066090 | -0.13020126 | Cu |
| 5.35263582  | 4.58929262 | -0.13246986 | Cu |
| 7.96770260  | 4.60378408 | -0.12079216 | Cu |
| 10.57831055 | 4.61725343 | -0.06324700 | Cu |
| 4.05620139  | 6.83620347 | -0.12456561 | Cu |
| 6.67217737  | 6.84964660 | -0.13026832 | Cu |
| 9.28079113  | 6.85876719 | -0.07226289 | Cu |
| 11.89809091 | 6.86965200 | -0.05161726 | Cu |
| 1.41505820  | 0.80885376 | -2.28000204 | Cu |
| 4.03187305  | 0.82517884 | -2.25808058 | Cu |
| 6.64733215  | 0.82744997 | -2.24400948 | Cu |
| 9.25981766  | 0.84837868 | -2.20926172 | Cu |
| 2.73492832  | 3.07052437 | -2.26676813 | Cu |
| 5.36899097  | 3.08051572 | -2.28233758 | Cu |
| 7.94866792  | 3.09519718 | -2.26591210 | Cu |

|             |            |             |    |
|-------------|------------|-------------|----|
| 10.56960053 | 3.10854487 | -2.19857413 | Cu |
| 4.06202045  | 5.33659353 | -2.29234932 | Cu |
| 6.66260482  | 5.34275147 | -2.30112828 | Cu |
| 9.26809971  | 5.36283053 | -2.25717337 | Cu |
| 11.89694776 | 5.36089047 | -2.18800885 | Cu |
| 5.36065236  | 7.57917963 | -2.28719827 | Cu |
| 7.99288699  | 7.58574462 | -2.26643223 | Cu |
| 10.60744813 | 7.61133185 | -2.21478710 | Cu |
| 13.20454928 | 7.62484382 | -2.18372820 | Cu |
| 0.12491136  | 1.54185361 | -4.45369394 | Cu |
| 2.74549790  | 1.55447138 | -4.42574705 | Cu |
| 5.35636471  | 1.55318324 | -4.39869667 | Cu |
| 7.97514757  | 1.56250230 | -4.37881260 | Cu |
| 1.44579618  | 3.80349881 | -4.44321254 | Cu |
| 4.02312369  | 3.80094557 | -4.39293142 | Cu |
| 6.67328039  | 3.75190114 | -4.52084817 | Cu |
| 9.32111345  | 3.82038471 | -4.36396176 | Cu |
| 2.74722059  | 6.06895642 | -4.42443863 | Cu |
| 5.31277863  | 6.10883924 | -4.52759330 | Cu |
| 8.05927976  | 6.12427932 | -4.51216424 | Cu |
| 10.62191303 | 6.10025595 | -4.35708324 | Cu |
| 4.06308229  | 8.33107889 | -4.41748799 | Cu |
| 6.69126326  | 8.36826461 | -4.38307726 | Cu |
| 9.32247380  | 8.35272911 | -4.36793889 | Cu |
| 11.92480653 | 8.35445522 | -4.37177381 | Cu |
| 6.70183950  | 5.33623498 | -5.65067476 | O  |

outcell: Unit cell vectors (Ang):

|           |           |           |
|-----------|-----------|-----------|
| 10.458027 | 0.046741  | 0.100093  |
| 5.269297  | 9.034133  | 0.038687  |
| 0.240911  | -0.037029 | 27.752723 |

### NH<sub>2</sub> on Cu bridge

|             |            |             |    |
|-------------|------------|-------------|----|
| 0.10417355  | 0.06948918 | -0.24137906 | Cu |
| 2.75892688  | 0.10594680 | -0.15941592 | Cu |
| 5.40511307  | 0.13330550 | -0.15067281 | Cu |
| 8.05180951  | 0.16356474 | -0.15233546 | Cu |
| 1.45838451  | 2.31946370 | -0.13062414 | Cu |
| 4.10873512  | 2.35348663 | -0.12700741 | Cu |
| 6.75829689  | 2.38200902 | -0.13831470 | Cu |
| 9.39903986  | 2.41350413 | -0.11304657 | Cu |
| 2.81613370  | 4.56759691 | -0.08951272 | Cu |
| 5.44987490  | 4.59836020 | -0.10885065 | Cu |
| 8.09888528  | 4.62362180 | -0.04283151 | Cu |
| 10.75809281 | 4.65400983 | -0.00272348 | Cu |
| 4.15736841  | 6.81861347 | -0.12276940 | Cu |
| 6.80414994  | 6.84241404 | -0.09195296 | Cu |
| 9.45776098  | 6.87369158 | 0.00147555  | Cu |
| 12.10894702 | 6.90454642 | 0.00817259  | Cu |
| 1.43437843  | 0.80707812 | -2.31486719 | Cu |
| 4.07849196  | 0.83961601 | -2.28112114 | Cu |
| 6.72171231  | 0.86724450 | -2.27265731 | Cu |
| 9.37606678  | 0.90104941 | -2.25278589 | Cu |
| 2.77545592  | 3.04791634 | -2.24839882 | Cu |

|             |            |             |    |
|-------------|------------|-------------|----|
| 5.44086987  | 3.08716572 | -2.27696558 | Cu |
| 8.05600507  | 3.12321528 | -2.27556175 | Cu |
| 10.73746130 | 3.13347979 | -2.18490703 | Cu |
| 4.14161237  | 5.30191350 | -2.26508381 | Cu |
| 6.76862495  | 5.32329403 | -2.23050381 | Cu |
| 9.43800150  | 5.34319354 | -2.12705214 | Cu |
| 12.08030111 | 5.38526046 | -2.13762242 | Cu |
| 5.48436979  | 7.52715252 | -2.27919534 | Cu |
| 8.13197036  | 7.58742306 | -2.16214024 | Cu |
| 10.78159224 | 7.60653048 | -2.14154712 | Cu |
| 13.42464734 | 7.63977877 | -2.13928994 | Cu |
| 0.12393396  | 1.49080125 | -4.48081764 | Cu |
| 2.76690207  | 1.52257650 | -4.45028042 | Cu |
| 5.41173024  | 1.56184458 | -4.41087543 | Cu |
| 8.06496874  | 1.58535565 | -4.39843792 | Cu |
| 1.46706409  | 3.73954862 | -4.42208347 | Cu |
| 4.04454741  | 3.75170292 | -4.33663644 | Cu |
| 6.82537659  | 3.81245390 | -4.50066789 | Cu |
| 9.45162262  | 3.83167169 | -4.30997349 | Cu |
| 2.79902253  | 6.00654101 | -4.38249897 | Cu |
| 5.44393489  | 6.06335081 | -4.51106499 | Cu |
| 8.20501128  | 6.09300430 | -4.20672083 | Cu |
| 10.78363275 | 6.08092930 | -4.27060426 | Cu |
| 4.15453637  | 8.25296140 | -4.38226556 | Cu |
| 6.83923660  | 8.28169554 | -4.33561372 | Cu |
| 9.47916716  | 8.31077071 | -4.30444754 | Cu |
| 12.10971470 | 8.33724892 | -4.29653375 | Cu |
| 6.26661463  | 5.00853719 | -6.03097722 | N  |
| 7.01284333  | 5.50725271 | -6.54477698 | H  |
| 5.66769205  | 4.54960038 | -6.73752148 | H  |

outcell: Unit cell vectors (Ang):

|           |          |           |
|-----------|----------|-----------|
| 10.594242 | 0.121492 | 0.110101  |
| 5.402716  | 8.990016 | 0.135010  |
| 0.263101  | 0.243887 | 28.496228 |

#### TEMPO (Au lattice vectors)

|            |             |            |   |
|------------|-------------|------------|---|
| 5.17476327 | 0.82285757  | 5.58504013 | H |
| 3.47483877 | 1.33779516  | 5.76284307 | H |
| 5.06246804 | 2.89450936  | 6.97810358 | H |
| 4.21203110 | 3.77734713  | 5.69084649 | H |
| 6.71477401 | 4.27366794  | 5.64852101 | H |
| 7.05350373 | 2.52648133  | 5.50932433 | H |
| 3.03159955 | 2.52261822  | 2.19472463 | H |
| 2.09195333 | 1.83607946  | 3.57378130 | H |
| 2.93414601 | 3.41108774  | 3.75912151 | H |
| 5.06959756 | -0.43734893 | 3.56180886 | H |
| 3.26658475 | -0.31401110 | 3.59356242 | H |
| 4.18925920 | 0.16876348  | 2.11225593 | H |
| 4.64331497 | 4.98101342  | 3.76606760 | H |
| 6.26691023 | 5.62054111  | 3.34445006 | H |
| 5.33709779 | 4.67092010  | 2.12923899 | H |
| 7.65191975 | 3.36327550  | 1.98117931 | H |
| 8.29122709 | 4.25251575  | 3.42414847 | H |

|            |            |            |   |
|------------|------------|------------|---|
| 8.22086801 | 2.44636749 | 3.41998439 | H |
| 5.50219074 | 2.25455312 | 3.09848658 | N |
| 4.28211251 | 1.62364674 | 3.75569774 | C |
| 4.44954444 | 1.62417209 | 5.30361377 | C |
| 4.95581156 | 2.96579558 | 5.87050667 | C |
| 6.31539962 | 3.31862362 | 5.23474031 | C |
| 6.26494478 | 3.43718287 | 3.68366255 | C |
| 3.01028735 | 2.40169564 | 3.29996401 | C |
| 4.19842136 | 0.16797719 | 3.22278714 | C |
| 5.57983384 | 4.75538123 | 3.21104041 | C |
| 7.69752356 | 3.37155124 | 3.09073298 | C |
| 5.54824348 | 2.15153307 | 1.80552711 | O |

outcell: Unit cell vectors (Ang):

|          |           |           |
|----------|-----------|-----------|
| 8.728290 | 0.119610  | 0.145709  |
| 4.467464 | 7.928269  | 0.081357  |
| 0.466402 | -0.038219 | 24.586261 |

### TEMPO (Cu lattice vectors)

|            |            |              |   |
|------------|------------|--------------|---|
| 8.16090922 | 4.24209959 | -7.25339335  | H |
| 4.62799090 | 2.00003978 | -7.32930858  | H |
| 7.11457227 | 4.41080369 | -9.38684247  | H |
| 4.99312831 | 3.05864728 | -9.42270966  | H |
| 7.81944440 | 5.27134002 | -7.00194022  | C |
| 8.58540223 | 5.99457033 | -7.36000769  | H |
| 3.84579767 | 2.74916542 | -7.07166583  | C |
| 6.52035965 | 5.33679377 | -9.19549589  | C |
| 4.39867484 | 3.98491712 | -9.23329377  | C |
| 2.86496450 | 2.37900406 | -7.44441784  | H |
| 7.73600391 | 5.34665643 | -5.89709556  | H |
| 5.26567272 | 5.01560184 | -10.95780182 | H |
| 7.09385008 | 6.17625747 | -9.65303026  | H |
| 5.44707656 | 4.61725361 | -7.02129630  | N |
| 5.14036685 | 5.18018980 | -9.86260202  | C |
| 6.44659177 | 5.57478971 | -7.65894981  | C |
| 3.80378746 | 2.83797270 | -5.96559182  | H |
| 4.17254436 | 4.12994200 | -7.70008090  | C |
| 3.40886832 | 3.82609673 | -9.72080601  | H |
| 5.41459213 | 4.63120516 | -5.72398676  | O |
| 4.54221911 | 6.11625488 | -9.76232899  | H |
| 6.02311950 | 7.03383061 | -7.31331303  | C |
| 3.02386675 | 5.12999435 | -7.37107330  | C |
| 6.84443947 | 7.74647288 | -7.55050918  | H |
| 2.03679456 | 4.69729589 | -7.64824645  | H |
| 5.80113098 | 7.09990066 | -6.22582922  | H |
| 3.02414715 | 5.33848230 | -6.27894212  | H |
| 5.12028217 | 7.36058365 | -7.87387525  | H |
| 3.13189344 | 6.09604443 | -7.91064223  | H |

outcell: Unit cell vectors (Ang):

|           |           |           |
|-----------|-----------|-----------|
| 10.533392 | 0.014623  | 0.074101  |
| 5.279631  | 9.091187  | 0.013978  |
| 0.164557  | -0.068882 | 24.508884 |

**Nit8 (Au lattice vectors)**

|            |             |            |   |
|------------|-------------|------------|---|
| 4.30028946 | 0.69123111  | 2.07851147 | O |
| 6.08245501 | -0.63356261 | 4.81430492 | H |
| 3.09686241 | -1.72080684 | 3.79991424 | H |
| 6.73444218 | 0.07878921  | 3.29495938 | H |
| 6.40124982 | 0.31683743  | 4.32925806 | C |
| 7.25063768 | 0.74056116  | 4.90704412 | H |
| 3.64914472 | -0.51059814 | 5.83573742 | H |
| 2.34904811 | -0.92711695 | 3.57881692 | C |
| 4.03858710 | 0.36127483  | 7.97548995 | H |
| 5.48288717 | 0.93846135  | 8.79492603 | H |
| 4.91932059 | 0.87327960  | 7.94560774 | N |
| 1.39586330 | -1.18442583 | 4.09290319 | H |
| 2.17586711 | -0.91406033 | 2.48046065 | H |
| 3.28852562 | 0.49977505  | 5.53176410 | C |
| 5.35644353 | 1.57056993  | 6.83332003 | C |
| 5.23630484 | 1.34108545  | 4.24316221 | C |
| 2.85928408 | 0.45764065  | 4.03856097 | C |
| 4.16662501 | 0.75401501  | 3.35736030 | N |
| 6.41444138 | 2.21970385  | 6.84954263 | O |
| 4.44524168 | 1.53552238  | 5.58586277 | C |
| 2.43610070 | 0.77316073  | 6.19382152 | H |
| 5.73777507 | 2.67718327  | 3.64422241 | C |
| 6.25929766 | 2.49012268  | 2.68008122 | H |
| 6.42875816 | 3.16711912  | 4.36493304 | H |
| 1.83536493 | 1.56390565  | 3.65854440 | C |
| 3.99911910 | 2.55912495  | 5.55684624 | H |
| 0.83041509 | 1.34619012  | 4.08447009 | H |
| 1.75081141 | 1.61048067  | 2.55026433 | H |
| 4.88608042 | 3.36411174  | 3.44010562 | H |
| 2.15296805 | 2.56793767  | 4.01831253 | H |

outcell: Unit cell vectors (Ang):

|          |           |           |
|----------|-----------|-----------|
| 8.762238 | -0.014182 | 0.050477  |
| 4.368670 | 7.556790  | -0.034675 |
| 0.159601 | -0.226337 | 27.693883 |

**Nit8 (Cu lattice vectors)**

|            |             |            |   |
|------------|-------------|------------|---|
| 4.19641088 | 0.70643794  | 2.01876509 | O |
| 6.01066911 | -0.66683101 | 4.77602582 | H |
| 2.99806978 | -1.77352527 | 3.80774228 | H |
| 6.64576235 | 0.01891157  | 3.23948281 | H |
| 6.32458321 | 0.27594537  | 4.27291868 | C |
| 7.18692736 | 0.70087342  | 4.83036298 | H |
| 3.58750461 | -0.55351408 | 5.78308309 | H |
| 2.28881335 | -0.97016016 | 3.50783317 | C |
| 3.95116399 | 0.35240417  | 7.93369616 | H |
| 5.41891281 | 0.89073062  | 8.73610675 | H |
| 4.85434577 | 0.82340340  | 7.88764597 | N |
| 1.28645929 | -1.20577285 | 3.92943410 | H |
| 2.22211979 | -0.96932650 | 2.39719349 | H |
| 3.21939856 | 0.45411530  | 5.47955599 | C |
| 5.28738703 | 1.52787266  | 6.77751726 | C |

|            |            |            |   |
|------------|------------|------------|---|
| 5.16152435 | 1.30374408 | 4.18777638 | C |
| 2.78380378 | 0.41421187 | 3.98748324 | C |
| 4.08675890 | 0.72334185 | 3.30200696 | N |
| 6.34678793 | 2.17371380 | 6.78970782 | O |
| 4.37277522 | 1.49553626 | 5.53227388 | C |
| 2.36971581 | 0.72115875 | 6.14775941 | H |
| 5.65951386 | 2.63526299 | 3.57927995 | C |
| 6.10773892 | 2.44504224 | 2.57967690 | H |
| 6.40935671 | 3.09828812 | 4.25683569 | H |
| 1.75482867 | 1.51976483 | 3.61583435 | C |
| 3.92552419 | 2.51869915 | 5.50821753 | H |
| 0.73922244 | 1.27475377 | 3.99939450 | H |
| 1.70770234 | 1.60714869 | 2.50768867 | H |
| 4.81441835 | 3.34576901 | 3.43848384 | H |
| 2.04823639 | 2.51321944 | 4.02293296 | H |

outcell: Unit cell vectors (Ang):

|           |          |           |
|-----------|----------|-----------|
| 10.719039 | 0.079345 | 0.046763  |
| 5.430007  | 9.004870 | 0.110791  |
| 0.093976  | 0.224175 | 25.589757 |

#### Nit9 (Au lattice vectors)

|            |            |            |   |
|------------|------------|------------|---|
| 4.50538679 | 0.99483254 | 3.69400482 | H |
| 7.84166964 | 1.85363111 | 3.66535099 | H |
| 3.82127816 | 1.79114059 | 3.32705440 | C |
| 3.68481263 | 1.65825426 | 2.23039823 | H |
| 8.08492648 | 2.91003733 | 3.41298573 | C |
| 8.37709712 | 2.95358296 | 2.34047306 | H |
| 2.83416773 | 1.67345576 | 3.82798140 | H |
| 8.93509825 | 3.24515985 | 4.04581056 | H |
| 5.91772819 | 2.75956072 | 7.51927584 | H |
| 5.71369721 | 3.40605009 | 1.53298076 | O |
| 5.70209168 | 3.34870703 | 2.81820133 | N |
| 4.41486169 | 3.20114571 | 3.59176317 | C |
| 6.86269846 | 3.83450168 | 3.64936016 | C |
| 6.62186807 | 3.49722447 | 7.48329479 | N |
| 4.93518319 | 3.38276309 | 5.00894762 | C |
| 6.26010992 | 3.70641392 | 5.05425005 | C |
| 7.24251319 | 3.60131251 | 8.28856299 | H |
| 7.10592689 | 3.97845161 | 6.27234656 | C |
| 4.26657860 | 3.28038136 | 5.88422071 | H |
| 8.16946186 | 4.62212025 | 6.20444173 | O |
| 3.42020546 | 4.31142646 | 3.14855094 | C |
| 3.36017132 | 4.29763874 | 2.03687136 | H |
| 7.19463082 | 5.30198143 | 3.25659824 | C |
| 7.40826156 | 5.33603779 | 2.16472473 | H |
| 2.40586406 | 4.13740235 | 3.56980974 | H |
| 8.06988391 | 5.66459797 | 3.83582660 | H |
| 3.76658966 | 5.31813016 | 3.47053018 | H |
| 6.33248068 | 5.97381700 | 3.46417359 | H |

outcell: Unit cell vectors (Ang):

|           |           |           |
|-----------|-----------|-----------|
| 8.875554  | -0.091411 | -0.038991 |
| 4.362771  | 7.374388  | -0.142144 |
| -0.034171 | -0.459770 | 24.566997 |

**Nit9 (Cu lattice vectors)**

|            |            |            |   |
|------------|------------|------------|---|
| 4.47946512 | 0.98842932 | 3.69385007 | H |
| 7.82025226 | 1.86324990 | 3.66935076 | H |
| 3.79439429 | 1.78522355 | 3.32922566 | C |
| 3.65752805 | 1.65373251 | 2.23255006 | H |
| 8.05912661 | 2.92005457 | 3.41501537 | C |
| 8.35090853 | 2.96093061 | 2.34241075 | H |
| 2.80783173 | 1.66491766 | 3.83005414 | H |
| 8.91036068 | 3.25892161 | 4.04417310 | H |
| 5.90547398 | 2.75797283 | 7.52146388 | H |
| 5.67540062 | 3.42345426 | 1.53306034 | O |
| 5.67185960 | 3.34641119 | 2.81720092 | N |
| 4.38596200 | 3.19537961 | 3.59562564 | C |
| 6.83165953 | 3.83825633 | 3.64903849 | C |
| 6.60294288 | 3.50179417 | 7.48246155 | N |
| 4.90863360 | 3.37751794 | 5.01195795 | C |
| 6.23183834 | 3.70738243 | 5.05433667 | C |
| 7.22834424 | 3.60843862 | 8.28370870 | H |
| 7.07992552 | 3.98477667 | 6.26959930 | C |
| 4.24341396 | 3.27294954 | 5.88947900 | H |
| 8.13880899 | 4.63493258 | 6.19641725 | O |
| 3.38862375 | 4.30462289 | 3.15510767 | C |
| 3.34307053 | 4.30149514 | 2.04270927 | H |
| 7.15101604 | 5.30776674 | 3.25603420 | C |
| 7.36500368 | 5.34072188 | 2.16437288 | H |
| 2.36952870 | 4.12243845 | 3.56175535 | H |
| 8.02148897 | 5.68025362 | 3.83565599 | H |
| 3.72746929 | 5.30927475 | 3.49068623 | H |
| 6.28247103 | 5.97235830 | 3.46037417 | H |

outcell: Unit cell vectors (Ang):

|           |          |           |
|-----------|----------|-----------|
| 10.785117 | 0.055071 | -0.033450 |
| 5.440060  | 9.133509 | 0.157827  |
| -0.101238 | 0.474907 | 25.797129 |

**Au 3 × 3**

|             |            |             |    |
|-------------|------------|-------------|----|
| -0.10960360 | 0.07199969 | -0.02539572 | Au |
| 2.81681566  | 0.07771357 | 0.01260146  | Au |
| 5.74408047  | 0.08456158 | 0.05055012  | Au |
| 1.35903743  | 2.60983071 | -0.03764024 | Au |
| 4.28511423  | 2.61506520 | 0.00014668  | Au |
| 7.21267882  | 2.62283378 | 0.03876968  | Au |
| 2.82732582  | 5.14732159 | -0.05040542 | Au |
| 5.75383597  | 5.15295636 | -0.01196351 | Au |
| 8.68064617  | 5.15986682 | 0.02607286  | Au |
| 1.39401538  | 0.88550602 | -2.51297345 | Au |
| 4.32045884  | 0.89139041 | -2.47467068 | Au |
| 7.24786604  | 0.89865592 | -2.43648985 | Au |
| 2.86331676  | 3.42351509 | -2.52546542 | Au |
| 5.78947191  | 3.42867365 | -2.48653024 | Au |
| 8.71656252  | 3.43573892 | -2.44900420 | Au |
| 4.33122182  | 5.96033651 | -2.53792733 | Au |

|             |             |             |    |
|-------------|-------------|-------------|----|
| 7.25840753  | 5.96634525  | -2.49963053 | Au |
| 10.18480119 | 5.97354708  | -2.46187441 | Au |
| -0.10667749 | 1.72572533  | -5.00449711 | Au |
| 2.81952817  | 1.73146655  | -4.96616770 | Au |
| 5.74619340  | 1.73765667  | -4.92754150 | Au |
| 1.36208989  | 4.26310834  | -5.01690411 | Au |
| 4.28890189  | 4.26891320  | -4.97899986 | Au |
| 7.21504827  | 4.27497428  | -4.94019149 | Au |
| 2.83038298  | 6.80055147  | -5.02961110 | Au |
| 5.75674576  | 6.80623980  | -4.99096533 | Au |
| 8.68318100  | 6.81258654  | -4.95272754 | Au |
| -0.06752252 | -0.00069369 | -7.47968496 | Au |
| 2.85834244  | 0.00566471  | -7.44144287 | Au |
| 5.78498416  | 0.01233336  | -7.40247438 | Au |
| 1.40048402  | 2.53700095  | -7.49182098 | Au |
| 4.32785284  | 2.54314259  | -7.45381734 | Au |
| 7.25394354  | 2.54938631  | -7.41507419 | Au |
| 2.86899355  | 5.07443627  | -7.50418385 | Au |
| 5.79543282  | 5.08073349  | -7.46632594 | Au |
| 8.72295215  | 5.08731890  | -7.42771767 | Au |

outcell: Unit cell vectors (Ang):

|          |           |           |
|----------|-----------|-----------|
| 8.779805 | 0.018586  | 0.114529  |
| 4.405527 | 7.612496  | -0.037229 |
| 0.358720 | -0.354460 | 25.853703 |

**Cu 4 × 4**

|             |            |             |    |
|-------------|------------|-------------|----|
| 0.00002150  | 0.00016509 | -0.01103229 | Cu |
| 2.64479668  | 0.04874914 | 0.01147773  | Cu |
| 5.28957203  | 0.09733257 | 0.03398837  | Cu |
| 7.93434576  | 0.14591575 | 0.05649911  | Cu |
| 1.36438288  | 2.26754459 | 0.01782430  | Cu |
| 4.00915660  | 2.31612810 | 0.04033426  | Cu |
| 6.65393153  | 2.36471095 | 0.06284518  | Cu |
| 9.29870551  | 2.41329464 | 0.08535599  | Cu |
| 2.72874263  | 4.53492422 | 0.04668134  | Cu |
| 5.37351629  | 4.58350762 | 0.06919028  | Cu |
| 8.01829159  | 4.63209132 | 0.09170187  | Cu |
| 10.66306695 | 4.68067475 | 0.11421366  | Cu |
| 4.09310325  | 6.80230528 | 0.07553840  | Cu |
| 6.73787796  | 6.85088768 | 0.09804775  | Cu |
| 9.38265380  | 6.89947244 | 0.12056062  | Cu |
| 12.02742757 | 6.94805556 | 0.14307046  | Cu |
| 1.31877952  | 0.75592510 | -2.12170337 | Cu |
| 3.96355436  | 0.80450899 | -2.09919335 | Cu |
| 6.60832781  | 0.85309226 | -2.07668259 | Cu |
| 9.25310229  | 0.90167511 | -2.05417204 | Cu |
| 2.68313990  | 3.02330454 | -2.09284676 | Cu |
| 5.32791323  | 3.07188774 | -2.07033789 | Cu |
| 7.97268565  | 3.12047188 | -2.04782735 | Cu |
| 10.61746281 | 3.16905486 | -2.02531445 | Cu |
| 4.04749884  | 5.29068428 | -2.06399138 | Cu |
| 6.69227266  | 5.33926697 | -2.04148464 | Cu |
| 9.33704756  | 5.38785229 | -2.01897028 | Cu |
| 11.98182347 | 5.43643520 | -1.99645816 | Cu |



|             |            |             |    |
|-------------|------------|-------------|----|
| 5.41186101  | 7.55806262 | -2.03513432 | Cu |
| 8.05663609  | 7.60664714 | -2.01262401 | Cu |
| 10.70141036 | 7.65523230 | -1.99011204 | Cu |
| 13.34618403 | 7.70381549 | -1.96760130 | Cu |
| -0.00284697 | 1.46573632 | -4.25553147 | Cu |
| 2.64193415  | 1.51432463 | -4.23302568 | Cu |
| 5.28670310  | 1.56290380 | -4.21050821 | Cu |
| 7.93147541  | 1.61148610 | -4.18799823 | Cu |
| 1.36151870  | 3.73311968 | -4.22668011 | Cu |
| 4.00629089  | 3.78170180 | -4.20416141 | Cu |
| 6.65106212  | 3.83027978 | -4.18165731 | Cu |
| 9.29583845  | 3.87886419 | -4.15914181 | Cu |
| 2.72587389  | 6.00049721 | -4.19781776 | Cu |
| 5.37064243  | 6.04908410 | -4.17531014 | Cu |
| 8.01542017  | 6.09766267 | -4.15279984 | Cu |
| 10.66019900 | 6.14624889 | -4.13028570 | Cu |
| 4.09023424  | 8.26787670 | -4.16896105 | Cu |
| 6.73501194  | 8.31646466 | -4.14645680 | Cu |
| 9.37978597  | 8.36504582 | -4.12393920 | Cu |
| 12.02455868 | 8.41362728 | -4.10142700 | Cu |

outcell: Unit cell vectors (Ang):

|           |          |           |
|-----------|----------|-----------|
| 10.579098 | 0.194334 | 0.090043  |
| 5.457442  | 9.069519 | 0.115427  |
| 0.194215  | 0.182617 | 25.665578 |

#### Cu adatom

|             |            |             |    |
|-------------|------------|-------------|----|
| 5.61856439  | 3.31824459 | 1.93317308  | Cu |
| 0.00492041  | 0.06157105 | 0.03601453  | Cu |
| 2.62593702  | 0.09008823 | 0.07403394  | Cu |
| 5.24316038  | 0.10786880 | 0.10462634  | Cu |
| 7.86435211  | 0.12479621 | 0.10495403  | Cu |
| 1.34011645  | 2.31767962 | 0.05419077  | Cu |
| 3.96604753  | 2.35033066 | 0.17147660  | Cu |
| 6.61248261  | 2.32107565 | 0.00018009  | Cu |
| 9.19210243  | 2.39028091 | 0.13058573  | Cu |
| 2.66099919  | 4.57721756 | 0.06078101  | Cu |
| 5.26564830  | 4.65211807 | -0.01885730 | Cu |
| 7.84668811  | 4.59286450 | 0.20336276  | Cu |
| 10.50262929 | 4.64526107 | 0.15555213  | Cu |
| 3.98578237  | 6.83571768 | 0.03172223  | Cu |
| 6.61270558  | 6.85741264 | 0.07228421  | Cu |
| 9.21879603  | 6.87006476 | 0.11831666  | Cu |
| 11.84148285 | 6.90299102 | 0.14157526  | Cu |
| 1.33839883  | 0.80265933 | -2.09570719 | Cu |
| 3.95782358  | 0.83439517 | -2.04734997 | Cu |
| 6.57239586  | 0.84410847 | -2.09125458 | Cu |
| 9.18748999  | 0.87920302 | -2.03345300 | Cu |
| 2.67683841  | 3.05277080 | -2.06689861 | Cu |
| 5.27769579  | 3.07548004 | -2.12072011 | Cu |
| 7.90588408  | 3.11087798 | -2.07617431 | Cu |
| 10.52062526 | 3.13137285 | -1.99190152 | Cu |
| 3.98983078  | 5.31162347 | -2.13509264 | Cu |
| 6.62216254  | 5.33346925 | -2.09749677 | Cu |
| 9.22117365  | 5.35464545 | -1.99864197 | Cu |

|             |            |             |    |
|-------------|------------|-------------|----|
| 11.84401130 | 5.38314640 | -1.98710128 | Cu |
| 5.32554478  | 7.56372447 | -2.10778835 | Cu |
| 7.94316632  | 7.59248912 | -2.06278970 | Cu |
| 10.55479658 | 7.61448199 | -2.03168854 | Cu |
| 13.17180370 | 7.63718872 | -2.02311142 | Cu |
| 0.02695660  | 1.51881365 | -4.27782439 | Cu |
| 2.64155088  | 1.53466582 | -4.23784487 | Cu |
| 5.25463692  | 1.54965338 | -4.23740341 | Cu |
| 7.87906386  | 1.57934039 | -4.23040731 | Cu |
| 1.35267580  | 3.76097596 | -4.25260994 | Cu |
| 3.96501267  | 3.78248820 | -4.25977836 | Cu |
| 6.59012390  | 3.81473289 | -4.24544622 | Cu |
| 9.20976761  | 3.84600529 | -4.18241389 | Cu |
| 2.67805690  | 6.01570425 | -4.28063594 | Cu |
| 5.29907121  | 6.04952940 | -4.26482148 | Cu |
| 7.92176921  | 6.07729048 | -4.21207896 | Cu |
| 10.53077074 | 6.08683261 | -4.17082076 | Cu |
| 4.00977866  | 8.27120349 | -4.28195713 | Cu |
| 6.63016039  | 8.30642064 | -4.23941202 | Cu |
| 9.24346502  | 8.32162776 | -4.20364743 | Cu |
| 11.86260694 | 8.33738023 | -4.19531668 | Cu |

outcell: Unit cell vectors (Ang):

|           |           |           |
|-----------|-----------|-----------|
| 10.467475 | 0.099633  | 0.121237  |
| 5.315590  | 9.018389  | 0.014054  |
| 0.293693  | -0.146240 | 27.700169 |

### Cu step

|             |            |             |    |
|-------------|------------|-------------|----|
| 7.85416699  | 0.11797971 | 0.06398510  | Cu |
| 6.56566861  | 2.35399283 | 0.03835490  | Cu |
| 9.14062940  | 2.35264986 | 0.03901610  | Cu |
| 5.27526083  | 4.58677043 | 0.02576690  | Cu |
| 7.85461445  | 4.58700033 | 0.10472133  | Cu |
| 10.43214278 | 4.58851944 | 0.00916257  | Cu |
| 3.98068134  | 6.82004091 | 0.01868383  | Cu |
| 6.56301983  | 6.81791709 | 0.00746239  | Cu |
| 9.14774593  | 6.81694196 | -0.00751515 | Cu |
| 11.73302010 | 6.82125479 | -0.02239922 | Cu |
| 1.40620733  | 0.84821056 | -1.77778925 | Cu |
| 3.98958010  | 0.85248452 | -1.81631896 | Cu |
| 6.54699455  | 0.83399282 | -2.04508119 | Cu |
| 9.16064285  | 0.83360607 | -2.04239186 | Cu |
| 2.69834251  | 3.08071773 | -1.82423317 | Cu |
| 5.23869107  | 3.05314895 | -2.04326657 | Cu |
| 7.85348960  | 3.07321373 | -2.09771331 | Cu |
| 10.46796899 | 3.04838634 | -2.04067132 | Cu |
| 3.96518922  | 5.29110614 | -2.06988347 | Cu |
| 6.56070383  | 5.31065569 | -2.10974803 | Cu |
| 9.14211650  | 5.30773966 | -2.12269203 | Cu |
| 11.73579987 | 5.28882114 | -2.09287757 | Cu |
| 5.27394864  | 7.56386685 | -2.08844029 | Cu |
| 7.85219874  | 7.58413622 | -2.07600956 | Cu |
| 10.42745223 | 7.56418456 | -2.11224904 | Cu |
| 13.00592524 | 7.52797657 | -2.17616458 | Cu |

|             |            |             |    |
|-------------|------------|-------------|----|
| 0.10863012  | 1.56898988 | -4.12694967 | Cu |
| 2.67492356  | 1.57205095 | -3.99065193 | Cu |
| 5.24116135  | 1.56122907 | -4.19129144 | Cu |
| 7.83423070  | 1.56502587 | -4.24677541 | Cu |
| 1.39488796  | 3.79721963 | -4.14872527 | Cu |
| 3.94920003  | 3.79258819 | -4.20269829 | Cu |
| 6.53718349  | 3.79706620 | -4.25268917 | Cu |
| 9.12873339  | 3.79884407 | -4.26470032 | Cu |
| 2.67141322  | 6.03195907 | -4.25941317 | Cu |
| 5.24882622  | 6.03301036 | -4.27106427 | Cu |
| 7.83365118  | 6.03801198 | -4.27793459 | Cu |
| 10.41547302 | 6.03316366 | -4.29582610 | Cu |
| 3.95908368  | 8.26030720 | -4.29180453 | Cu |
| 6.54408455  | 8.27535740 | -4.24601796 | Cu |
| 9.12170883  | 8.27324457 | -4.26053163 | Cu |
| 11.69938735 | 8.25633507 | -4.34844392 | Cu |

outcell: Unit cell vectors (Ang):

|           |           |           |
|-----------|-----------|-----------|
| 10.315967 | -0.003840 | -0.070502 |
| 5.153125  | 8.921133  | -0.132160 |
| -0.185656 | -0.304756 | 28.057206 |

#### Nit8 H-bonded dimer gas phase

|   |          |           |           |
|---|----------|-----------|-----------|
| O | 6.581578 | 0.961059  | 1.146206  |
| H | 3.545832 | -0.408750 | 2.092794  |
| H | 6.015788 | -2.108759 | 1.404295  |
| H | 4.260544 | 1.102684  | 2.677405  |
| C | 3.623399 | 0.666823  | 1.903011  |
| H | 2.625137 | 1.106558  | 1.978669  |
| H | 4.002690 | -1.862902 | 0.126686  |
| C | 6.567361 | -1.867332 | 0.490309  |
| H | 2.006316 | -1.977240 | -0.589181 |
| H | 0.441193 | -1.183681 | -0.555014 |
| N | 1.468822 | -1.126172 | -0.559361 |
| H | 6.685212 | -2.783183 | -0.098590 |
| H | 7.557677 | -1.504200 | 0.776482  |
| C | 4.370442 | -1.187035 | -0.654876 |
| C | 2.064907 | 0.081743  | -0.572686 |
| C | 4.237713 | 0.964199  | 0.521373  |
| C | 5.830228 | -0.803808 | -0.332523 |
| N | 5.629486 | 0.423928  | 0.486342  |
| O | 1.411249 | 1.138837  | -0.557034 |
| C | 3.590117 | 0.143896  | -0.636741 |
| H | 4.291555 | -1.704751 | -1.615970 |
| C | 4.261377 | 2.473067  | 0.259414  |
| H | 4.828213 | 2.978395  | 1.045649  |
| H | 3.238587 | 2.855827  | 0.237523  |
| C | 6.641408 | -0.446146 | -1.593228 |
| H | 3.799324 | 0.685674  | -1.567680 |
| H | 6.845663 | -1.347015 | -2.181887 |
| H | 7.594589 | 0.004512  | -1.302795 |
| H | 4.737964 | 2.694512  | -0.701062 |
| H | 6.106656 | 0.266838  | -2.228805 |

|   |           |           |           |
|---|-----------|-----------|-----------|
| H | -6.107097 | -0.267498 | -2.228464 |
| H | -6.846020 | 1.346404  | -2.181956 |
| C | -6.641695 | 0.445728  | -1.593028 |
| H | -4.738266 | -2.694699 | -0.700212 |
| H | -3.799722 | -0.686190 | -1.567695 |
| H | -7.594841 | -0.004786 | -1.302258 |
| H | -4.291771 | 1.704266  | -1.616626 |
| C | -4.261450 | -2.472969 | 0.260084  |
| H | -3.238687 | -2.855794 | 0.238081  |
| C | -3.590262 | -0.144125 | -0.636982 |
| C | -2.065033 | -0.082070 | -0.573281 |
| C | -5.830255 | 0.803784  | -0.332602 |
| O | -1.411455 | -1.139219 | -0.557893 |
| C | -4.370516 | 1.186841  | -0.655366 |
| N | -1.468844 | 1.125793  | -0.560239 |
| H | -4.828134 | -2.978011 | 1.046612  |
| C | -4.237646 | -0.964018 | 0.521547  |
| H | -2.006289 | 1.976913  | -0.589425 |
| N | -5.629399 | -0.423683 | 0.486641  |
| H | -0.441198 | 1.183233  | -0.555548 |
| O | -6.581375 | -0.960548 | 1.146887  |
| H | -6.685107 | 2.783273  | -0.099173 |
| C | -6.567184 | 1.867616  | 0.490013  |
| H | -7.557461 | 1.504625  | 0.776501  |
| H | -4.002600 | 1.862929  | 0.125929  |
| C | -3.623017 | -0.666229 | 1.902954  |
| H | -2.624761 | -1.105993 | 1.978537  |
| H | -6.015424 | 2.109327  | 1.403811  |
| H | -4.260010 | -1.101810 | 2.677630  |
| H | -3.545350 | 0.409400  | 2.092380  |

**Nit9 H-bonded dimer gas phase**

|   |          |           |           |
|---|----------|-----------|-----------|
| H | 5.990616 | 2.067417  | -1.409992 |
| H | 4.257765 | -0.476209 | -2.516873 |
| C | 6.487841 | 1.970898  | -0.440573 |
| H | 7.524093 | 1.665095  | -0.610485 |
| C | 4.201663 | -1.369373 | -1.886922 |
| H | 4.971297 | -2.073160 | -2.215828 |
| H | 6.487290 | 2.947834  | 0.054074  |
| H | 3.218610 | -1.830532 | -2.011631 |
| H | 1.872533 | 2.103447  | -0.060061 |
| O | 6.862131 | -1.029366 | -0.504515 |
| N | 5.783874 | -0.399502 | -0.243598 |
| C | 5.782879 | 0.922310  | 0.440320  |
| C | 4.432509 | -1.019124 | -0.407170 |
| N | 1.392419 | 1.225749  | 0.057127  |
| C | 4.297955 | 1.152733  | 0.549611  |
| C | 3.562878 | 0.130799  | 0.084082  |
| H | 0.364815 | 1.212528  | 0.056282  |
| C | 2.070632 | 0.057337  | 0.062213  |
| H | 3.906638 | 2.063132  | 0.994252  |
| O | 1.492316 | -1.043968 | 0.055680  |
| C | 6.474681 | 0.817759  | 1.814302  |
| H | 7.511322 | 0.498101  | 1.675651  |
| C | 4.337689 | -2.281894 | 0.471464  |

|   |           |           |           |
|---|-----------|-----------|-----------|
| H | 5.121289  | -2.982744 | 0.169398  |
| H | 6.470254  | 1.790354  | 2.317290  |
| H | 3.357193  | -2.745108 | 0.351102  |
| H | 5.968427  | 0.091259  | 2.455906  |
| H | 4.479045  | -2.035468 | 1.528084  |
| H | -5.991403 | -2.067045 | -1.409837 |
| H | -4.257948 | 0.476104  | -2.517002 |
| C | -6.488472 | -1.970355 | -0.440354 |
| H | -7.524662 | -1.664272 | -0.610137 |
| C | -4.201513 | 1.369260  | -1.887072 |
| H | -4.970969 | 2.073275  | -2.215908 |
| H | -6.488126 | -2.947277 | 0.054322  |
| H | -3.218342 | 1.830140  | -2.011901 |
| H | -1.873068 | -2.104218 | -0.059831 |
| O | -6.861935 | 1.030013  | -0.504330 |
| N | -5.783821 | 0.399852  | -0.243550 |
| C | -5.783104 | -0.921935 | 0.440411  |
| C | -4.432299 | 1.019115  | -0.407291 |
| N | -1.392717 | -1.226530 | 0.056394  |
| C | -4.298223 | -1.152772 | 0.549499  |
| C | -3.562927 | -0.131043 | 0.083873  |
| H | -0.365130 | -1.213543 | 0.056080  |
| C | -2.070673 | -0.057968 | 0.061833  |
| H | -3.907135 | -2.063304 | 0.994073  |
| O | -1.492054 | 1.043180  | 0.055252  |
| C | -6.474682 | -0.817152 | 1.814487  |
| H | -7.511263 | -0.497236 | 1.675981  |
| C | -4.337042 | 2.281874  | 0.471305  |
| H | -5.120489 | 2.982923  | 0.169305  |
| H | -6.470430 | -1.789731 | 2.317507  |
| H | -3.356437 | 2.744824  | 0.350826  |
| H | -5.968150 | -0.090759 | 2.455992  |
| H | -4.478343 | 2.035513  | 1.527946  |

**Nit9 on Cu step via CO and NH<sub>2</sub>**

|             |            |             |    |
|-------------|------------|-------------|----|
| 7.75809742  | 0.03454314 | 0.09122556  | Cu |
| 6.32402118  | 2.16023486 | 0.08851125  | Cu |
| 9.01358133  | 2.26250237 | 0.09467925  | Cu |
| 4.98757489  | 4.43244697 | 0.07464963  | Cu |
| 7.69198245  | 4.49179423 | 0.27336841  | Cu |
| 10.32007998 | 4.50871846 | 0.18266464  | Cu |
| 3.85245461  | 6.73106448 | 0.06191681  | Cu |
| 6.40431025  | 6.73734239 | 0.07850984  | Cu |
| 9.00830688  | 6.75593711 | 0.17137013  | Cu |
| 11.58783982 | 6.75625995 | 0.19400122  | Cu |
| 1.33124873  | 0.79352480 | -1.73029929 | Cu |
| 3.93926463  | 0.80086717 | -1.64134864 | Cu |
| 6.46243152  | 0.78963492 | -2.02066843 | Cu |
| 9.07501964  | 0.79117092 | -1.98912389 | Cu |
| 2.64894153  | 3.04218721 | -1.64483111 | Cu |
| 5.14199411  | 2.99424505 | -2.05387037 | Cu |
| 7.73436634  | 3.02288883 | -1.96931596 | Cu |
| 10.39083956 | 3.01266303 | -1.89553044 | Cu |
| 3.89535489  | 5.23635270 | -2.04478516 | Cu |

|             |            |             |    |
|-------------|------------|-------------|----|
| 6.46339792  | 5.23054562 | -1.97271500 | Cu |
| 9.03447824  | 5.24602061 | -1.90872733 | Cu |
| 11.65318796 | 5.25208302 | -1.88839520 | Cu |
| 5.19193819  | 7.50137268 | -2.01801557 | Cu |
| 7.76774805  | 7.54298019 | -1.91915179 | Cu |
| 10.34223737 | 7.50353121 | -1.90929684 | Cu |
| 12.90622930 | 7.48161809 | -1.99798732 | Cu |
| 0.10300187  | 1.54522161 | -4.13019709 | Cu |
| 2.66645642  | 1.55794521 | -3.83009189 | Cu |
| 5.20405096  | 1.53888974 | -4.18390250 | Cu |
| 7.80022342  | 1.55359487 | -4.18544159 | Cu |
| 1.38574894  | 3.77062300 | -4.05557117 | Cu |
| 3.91923235  | 3.76685128 | -4.19608675 | Cu |
| 6.51097166  | 3.78091922 | -4.19761055 | Cu |
| 9.09033500  | 3.77834274 | -4.09163600 | Cu |
| 2.64756374  | 6.00556126 | -4.21805759 | Cu |
| 5.22810744  | 6.01037455 | -4.20519319 | Cu |
| 7.79766795  | 6.01510511 | -4.10097229 | Cu |
| 10.36797236 | 6.00760717 | -4.07624188 | Cu |
| 3.94277107  | 8.23680545 | -4.22192105 | Cu |
| 6.51900170  | 8.25546533 | -4.10652433 | Cu |
| 9.08507331  | 8.25501920 | -4.03400549 | Cu |
| 11.65322172 | 8.23432663 | -4.17121155 | Cu |
| 7.86117675  | 2.75300146 | 7.04919635  | H  |
| 7.12589759  | 3.41834605 | 7.55278376  | C  |
| 7.64359579  | 4.35879943 | 7.84646775  | H  |
| 6.75712626  | 2.91003650 | 8.47130921  | H  |
| 6.51764799  | 0.71495971 | 4.54775711  | H  |
| 8.15479246  | 3.84574614 | 2.83561086  | H  |
| 5.92784344  | 3.73122238 | 6.61533790  | C  |
| 6.98779279  | 5.05527355 | 5.07588116  | H  |
| 6.35585931  | 4.16183018 | 5.22684926  | C  |
| 5.20249456  | 2.45727536 | 6.27269098  | N  |
| 5.41715501  | 0.82104218 | 4.42117270  | C  |
| 4.63219317  | 1.73296100 | 7.16834221  | O  |
| 7.31608688  | 4.27545256 | 2.40184790  | N  |
| 5.83672428  | 3.36456586 | 4.21024146  | C  |
| 5.46038676  | 5.65617360 | 7.60981078  | H  |
| 4.94252328  | 4.71813856 | 7.30987973  | C  |
| 4.91908426  | 0.09594100 | 5.10389435  | H  |
| 4.94761393  | 2.25200428 | 4.79707761  | C  |
| 7.29312001  | 5.25557315 | 2.73685383  | H  |
| 4.52466214  | 4.23057429 | 8.21943806  | H  |
| 6.11481321  | 3.52804251 | 2.80403720  | C  |
| 5.15604736  | 0.57741905 | 3.36767490  | H  |
| 5.38175259  | 3.02573404 | 1.84523669  | O  |
| 4.09934013  | 4.98403462 | 6.63575372  | H  |
| 3.42920880  | 2.42598563 | 4.52296201  | C  |
| 2.87203135  | 1.72873523 | 5.18959446  | H  |
| 3.09636892  | 3.46292288 | 4.74889892  | H  |
| 3.19225710  | 2.20292006 | 3.46019169  | H  |

outcell: Unit cell vectors (Ang):

|           |           |           |
|-----------|-----------|-----------|
| 10.289565 | 0.005863  | 0.056542  |
| 5.148780  | 8.916275  | 0.016267  |
| 0.157928  | -0.042810 | 28.517149 |
